# Supplementary material for: Fossil eggshell cuticle elucidates dinosaur nesting ecology
Source: PeerJ. 2018 Jul 6;6:e5144. doi: 10.7717/peerj.5144 (PMC6037156; doi:10.7717/peerj.5144)
Supplement: Data S1 — Raw data from elemental analyses of Macroolithus yaotunensis eggshells from Jiangxi, Henan, and Guangdong Provinces of China, and Triprismatoolithus eggshell from Montana, USA. [file peerj-06-5144-s002.xlsx]

## Sheet: 工作表1
Thickness (µm)	Triprismatoolithus Ca	Triprismatoolithus P	Thickness (µm)	Macroolithus Jiangxi Ca	Macroolithus Jiangxi P	Thickness (µm)	Macroolithus Henan Ca	Macroolithus Henan P	Thickness (µm)	Macroolithus Guangdong Ca	Macroolithus Guangdong P
1	450	2	1	4931	6	0	12775	5	0	4576	2
2	488	7	2	11863	10	1.01	12692	6	1.02	10925	2
3	754	10	3	15206	6	2.02	12705	8	2.03	10427	1
4	684	13	4	16954	3	3.03	12987	3	3.05	12079	5
5	693	8	5	18932	10	4.04	12477	8	4.06	12922	5
6	1010	14	6	19758	15	5.05	12717	3	5.08	12520	5
7	1770	34	7	21157	23	6.06	12940	9	6.1	11543	1
8	5558	17	8	21665	13	7.07	13123	15	7.11	12991	2
9	8266	24	9	21631	18	8.09	13466	9	8.13	13039	6
10	16897	41	10	21257	15	9.1	13178	16	9.14	13326	3
11	18153	39	11	21678	15	10.11	12652	12	10.16	13125	6
12	18320	51	12	21387	18	11.12	12026	7	11.18	13017	7
13	23193	43	13	21333	19	12.13	12730	10	12.19	12684	12
14	23007	34	14	21920	16	13.14	12862	8	13.21	12945	3
15	22623	31	15	22086	16	14.15	13075	8	14.22	13403	9
16	22867	52	16	21915	17	15.16	13296	7	15.24	12989	8
17	22207	35	17	21749	19	16.17	13267	9	16.25	12833	9
18	22398	51	18	21414	20	17.18	13188	6	17.27	12844	17
19	22544	34	19	22257	25	18.19	13158	6	18.29	12528	9
20	22405	41	20	23068	13	19.2	13174	7	19.3	9869	11
21	20342	39	21	22601	23	20.21	13688	10	20.32	9277	7
22	23109	46	22	22720	16	21.22	13425	4	21.33	11921	6
23	23022	45	23	22547	21	22.23	13284	9	22.35	12838	8
24	23041	44	24	22389	14	23.24	12836	14	23.37	13122	4
25	23208	47	25	21563	12	24.26	12797	1	24.38	13117	9
26	23195	44	26	22148	17	25.27	12798	16	25.4	13347	7
27	23112	31	27	22613	21	26.28	12935	13	26.41	13299	9
28	22972	42	28	22242	23	27.29	13041	16	27.43	13032	4
29	23499	34	29	22616	18	28.3	12750	10	28.45	13061	7
30	23546	43	30	22860	15	29.31	12920	11	29.46	12810	7
31	22932	43	31	22155	20	30.32	13103	9	30.48	12860	9
32	23270	48	32	21772	15	31.33	13129	13	31.49	13148	9
33	23746	39	33	21863	25	32.34	13121	6	32.51	13179	15
34	23332	38	34	22375	36	33.35	13160	9	33.53	13381	5
35	23736	34	35	22279	23	34.36	13135	3	34.54	13426	10
36	23141	37	36	22484	24	35.37	13109	9	35.56	13010	8
37	22202	41	37	22255	31	36.38	13141	9	36.57	13007	6
38	23310	47	38	22161	30	37.39	13099	10	37.59	13148	9
39	22693	42	39	22636	29	38.4	12892	16	38.61	12990	13
40	22816	37	40	21857	16	39.41	13210	8	39.62	13358	5
41	22696	46	41	22550	33	40.43	13005	13	40.64	13237	14
42	22182	42	42	22784	16	41.44	12836	8	41.65	13194	9
43	22461	34	43	22129	22	42.45	12830	9	42.67	13572	8
44	21976	35	44	22368	27	43.46	13216	11	43.68	13320	5
45	22136	41	45	21523	27	44.47	13230	8	44.7	13510	3
46	21947	32	46	21571	27	45.48	13039	6	45.72	13051	10
47	22274	35	47	21708	29	46.49	13152	9	46.73	12533	7
48	22450	45	48	22755	25	47.5	13226	14	47.75	12624	9
49	22807	36	49	22459	31	48.51	13220	5	48.76	13064	8
50	23115	38	50	22772	39	49.52	13252	9	49.78	13040	12
51	23142	28	51	23081	38	50.53	13056	10	50.8	13083	23
52	22854	33	52	22729	39	51.54	12881	11	51.81	13184	8
53	22239	44	53	22815	36	52.55	12487	13	52.83	13137	18
54	21495	36	54	22504	40	53.56	12785	5	53.84	13256	9
55	21959	41	55	22160	20	54.57	13208	5	54.86	13143	7
56	22349	30	56	22524	25	55.58	13594	7	55.88	12584	10
57	22691	36	57	22505	24	56.6	13477	6	56.89	12092	5
58	22582	30	58	22555	43	57.61	13268	10	57.91	13166	7
59	23193	51	59	22834	34	58.62	12891	11	58.92	13286	10
60	23581	41	60	22806	27	59.63	12993	10	59.94	13071	12
61	22976	26	61	22850	20	60.64	12989	13	60.96	13010	10
62	22716	29	62	22457	30	61.65	13285	13	61.97	13137	8
63	23572	40	63	22329	37	62.66	13589	4	62.99	13265	8
64	24090	37	64	22342	29	63.67	13548	11	64	13166	9
65	23466	40	65	22317	29	64.68	13731	16	65.02	13217	13
66	23487	44	66	22276	25	65.69	13469	9	66.04	12847	8
67	23096	30	67	23007	33	66.7	13186	14	67.05	13045	31
68	23608	44	68	23302	26	67.71	12934	13	68.07	12750	46
69	23978	48	69	22589	34	68.72	12959	5	69.08	12776	24
70	24021	27	70	22989	37	69.73	12512	8	70.1	13171	20
71	23926	43	71	23021	29	70.74	12526	14	71.11	13147	13
72	23754	26	72	22704	37	71.75	12894	14	72.13	13078	10
73	23209	39	73	22298	32	72.77	13582	10	73.15	12768	12
74	24188	43	74	22320	31	73.78	13216	13	74.16	12889	9
75	24353	33	75	22640	38	74.79	12623	14	75.18	12860	7
76	24050	40	76	23105	33	75.8	12597	11	76.19	13020	9
77	23861	47	77	23163	43	76.81	12884	8	77.21	13008	6
78	23521	49	78	23378	28	77.82	12987	13	78.23	13035	14
79	23418	53	79	23096	28	78.83	12856	8	79.24	12977	20
80	23479	59	80	23002	30	79.84	12726	10	80.26	13120	11
81	22953	68	81	22801	44	80.85	13015	7	81.27	13116	19
82	23964	39	82	21383	38	81.86	13038	7	82.29	13115	12
83	23628	48	83	21777	33	82.87	13196	4	83.31	13422	8
84	23020	35	84	22337	46	83.88	13050	7	84.32	13510	9
85	22316	29	85	22149	52	84.89	13379	3	85.34	13462	14
86	23093	38	86	22393	44	85.9	12785	7	86.35	13158	13
87	23345	30	87	21949	39	86.91	12496	11	87.37	12692	14
88	23585	41	88	22834	33	87.93	12529	8	88.39	12823	8
89	23358	35	89	23406	27	88.94	12390	15	89.4	12137	9
90	23541	32	90	23249	38	89.95	12691	14	90.42	11872	8
91	23313	28	91	22730	50	90.96	12887	3	91.43	11864	12
92	23230	30	92	23005	45	91.97	13122	8	92.45	12214	17
93	23502	23	93	23250	46	92.98	13164	20	93.47	12642	8
94	23013	29	94	22572	51	93.99	13109	11	94.48	12985	11
95	23401	32	95	22082	41	95	12915	13	95.5	12866	18
96	23382	21	96	22631	44	96.01	12746	13	96.51	12912	13
97	23762	36	97	22717	41	97.02	12814	13	97.53	12808	9
98	24353	34	98	22247	36	98.03	12923	2	98.54	13147	4
99	24348	33	99	22688	32	99.04	13161	14	99.56	13033	3
100	24024	29	100	22556	47	100.05	13188	7	100.58	13394	3
101	23591	24	101	21135	45	101.06	13279	11	101.59	13181	3
102	23036	23	102	22333	35	102.07	13125	14	102.61	13203	7
103	22848	16	103	22321	45	103.08	13021	12	103.62	12887	8
104	21856	13	104	21718	38	104.1	13636	11	104.64	13009	4
105	22514	16	105	20115	40	105.11	13549	12	105.66	12963	7
106	22968	9	106	21648	36	106.12	13185	13	106.67	12870	6
107	22119	14	107	22328	33	107.13	13081	6	107.69	13049	5
108	13344	14	108	22584	52	108.14	13198	11	108.7	12777	9
109	19342	12	109	22651	43	109.15	13285	6	109.72	12774	10
110	22622	8	110	21811	51	110.16	13114	10	110.74	13385	16
111	21615	27	111	22053	50	111.17	13074	9	111.75	13226	5
112	21216	13	112	22673	55	112.18	13043	8	112.77	13501	6
113	21633	6	113	19193	34	113.19	13398	9	113.78	13435	8
114	22622	8	114	17600	42	114.2	12765	7	114.8	13750	6
115	23690	16	115	21775	52	115.21	12984	7	115.82	13451	3
116	23610	20	116	21802	21	116.22	12846	5	116.83	13197	14
117	22504	15	117	21510	31	117.23	12277	14	117.85	13138	9
118	21810	26	118	22857	48	118.24	12988	9	118.86	13296	7
119	22502	17	119	22601	49	119.25	12915	10	119.88	13138	6
120	22346	22	120	23029	56	120.27	12645	14	120.9	13129	13
121	22271	17	121	23349	50	121.28	13112	14	121.91	13142	7
122	22502	16	122	23330	51	122.29	13042	18	122.93	13250	7
123	22241	15	123	22665	61	123.3	13225	13	123.94	13355	7
124	23347	15	124	23263	56	124.31	13060	14	124.96	13149	4
125	23607	17	125	23126	66	125.32	13282	12	125.97	12938	6
126	22919	23	126	23745	44	126.33	12771	9	126.99	13334	6
127	23364	23	127	22803	50	127.34	12832	17	128.01	13274	5
128	22163	22	128	22257	38	128.35	12866	14	129.02	13393	8
129	22857	15	129	23000	47	129.36	12927	13	130.04	13252	7
130	22815	27	130	22706	45	130.37	13208	16	131.05	13363	6
131	22893	19	131	23167	56	131.38	13437	11	132.07	13405	4
132	23325	23	132	22815	42	132.39	13372	11	133.09	13212	5
133	23547	35	133	22627	44	133.4	13237	13	134.1	13085	11
134	23129	37	134	22780	36	134.41	13306	10	135.12	13208	8
135	23063	36	135	22555	32	135.42	13388	11	136.13	12964	3
136	21185	26	136	23235	49	136.44	13085	5	137.15	12670	9
137	21836	35	137	23184	40	137.45	13374	17	138.17	12762	7
138	22414	32	138	23077	50	138.46	13156	10	139.18	13230	3
139	22631	36	139	23115	34	139.47	12816	13	140.2	12880	5
140	23449	33	140	22460	31	140.48	12953	11	141.21	13149	9
141	23864	18	141	23019	39	141.49	12910	14	142.23	13073	8
142	22876	28	142	22720	36	142.5	13106	14	143.25	13251	6
143	23195	30	143	22555	26	143.51	12871	14	144.26	13098	11
144	23334	27	144	23416	30	144.52	13124	14	145.28	13118	15
145	23268	14	145	21984	25	145.53	13256	9	146.29	13024	4
146	21225	36	146	22729	18	146.54	13331	11	147.31	12983	6
147	20304	12	147	22920	22	147.55	13261	14	148.33	13018	4
148	21583	27	148	22803	46	148.56	13248	12	149.34	13167	7
149	21623	26	149	22669	49	149.57	13268	17	150.36	13327	6
150	21646	20	150	22464	42	150.58	13014	21	151.37	13230	7
151	22542	22	151	22930	54	151.59	12096	12	152.39	13423	4
152	22228	27	152	24169	49	152.61	11795	7	153.4	13478	6
153	21428	29	153	22809	56	153.62	12984	13	154.42	13336	5
154	22494	24	154	22555	43	154.63	12958	23	155.44	13256	10
155	22190	35	155	22393	40	155.64	13602	16	156.45	13067	12
156	20142	43	156	23008	45	156.65	13486	12	157.47	12933	15
157	21601	45	157	22368	40	157.66	13452	17	158.48	12906	10
158	20780	33	158	22529	38	158.67	13089	10	159.5	13306	13
159	20143	30	159	22583	48	159.68	13363	20	160.52	13329	5
160	20744	41	160	22296	35	160.69	13200	9	161.53	13405	5
161	20375	44	161	21718	26	161.7	13370	23	162.55	13285	8
162	19984	47	162	21159	10	162.71	13250	10	163.56	13402	8
163	19736	48	163	21070	26	163.72	13022	10	164.58	13656	7
164	20936	39	164	21587	24	164.73	13154	8	165.6	13325	4
165	22750	52	165	21907	27	165.74	13570	12	166.61	13279	8
166	22749	62	166	21326	13	166.75	13322	12	167.63	13166	5
167	22492	45	167	21821	3	167.77	12990	12	168.64	13439	9
168	22784	42	168	20085	8	168.78	12808	12	169.66	13460	3
169	21685	33	169	17430	6	169.79	13128	11	170.68	13169	6
170	15585	28	170	19223	20	170.8	13432	20	171.69	13087	7
171	17402	18	171	21481	31	171.81	13449	16	172.71	12835	6
172	22888	38	172	19183	44	172.82	13150	8	173.72	12823	1
173	21028	36	173	14086	35	173.83	13006	8	174.74	13044	4
174	19975	21	174	10825	15	174.84	13015	10	175.76	13000	3
175	19862	12	175	17225	12	175.85	12904	15	176.77	13135	2
176	20304	26	176	22833	42	176.86	12774	18	177.79	13295	2
177	20987	36	177	23548	53	177.87	12744	16	178.8	13459	7
178	17846	31	178	23968	43	178.88	12606	8	179.82	13375	2
179	21390	37	179	23668	40	179.89	12835	8	180.83	12907	6
180	20491	33	180	23400	31	180.9	12857	9	181.85	13074	9
181	22366	26	181	22194	45	181.91	12614	16	182.87	12450	8
182	22210	26	182	23089	40	182.92	13120	17	183.88	12356	7
183	20085	27	183	22011	39	183.94	13331	16	184.9	12623	10
184	15439	27	184	21881	23	184.95	13429	9	185.91	12676	11
185	15163	29	185	22391	51	185.96	13575	16	186.93	12942	16
186	17098	27	186	23084	51	186.97	13654	12	187.95	13134	5
187	21807	31	187	23164	53	187.98	13270	11	188.96	12659	10
188	22762	26	188	22904	49	188.99	13402	17	189.98	13223	18
189	22457	22	189	21983	51	190	13507	20	190.99	13090	8
190	22588	31	190	19728	39	191.01	13653	14	192.01	13317	5
191	22520	32	191	20463	31	192.02	13946	6	193.03	13176	5
192	22641	39	192	22467	26	193.03	13281	19	194.04	12951	9
193	23036	33	193	22925	44	194.04	13113	13	195.06	12887	2
194	22869	32	194	22346	37	195.05	13368	20	196.07	12847	6
195	23100	30	195	22557	44	196.06	13445	16	197.09	13072	3
196	23108	30	196	23118	39	197.07	13240	11	198.11	13006	8
197	22992	32	197	22406	39	198.08	13048	10	199.12	13426	1
198	22990	42	198	22188	46	199.09	13502	6	200.14	13600	3
199	23106	35	199	22508	31	200.11	13287	16	201.15	13563	5
200	23423	49	200	22537	35	201.12	13252	16	202.17	13536	9
201	23539	45	201	22792	39	202.13	13007	12	203.19	13608	10
202	23772	40	202	22595	38	203.14	13043	5	204.2	13404	10
203	23359	37	203	17199	31	204.15	13084	10	205.22	13287	2
204	23159	33	204	5275	9	205.16	13722	14	206.23	13295	4
205	23130	41	205	10187	12	206.17	13336	6	207.25	13420	4
206	23024	37	206	20168	14	207.18	13422	10	208.26	13395	11
207	23474	34	207	21985	30	208.19	13369	11	209.28	12817	9
208	23237	42	208	23264	40	209.2	12913	10	210.3	12912	6
209	23350	45	209	22998	37	210.21	12820	14	211.31	13099	6
210	23281	40	210	22567	38	211.22	12825	10	212.33	13234	11
211	23601	34	211	22503	38	212.23	13199	13	213.34	12924	7
212	23976	47	212	22349	38	213.24	13165	12	214.36	13256	9
213	23814	53	213	22903	31	214.25	13171	12	215.38	13195	5
214	23620	46	214	22856	33	215.26	13424	23	216.39	13391	7
215	22683	40	215	22726	37	216.28	13633	13	217.41	13259	6
216	23192	47	216	22723	40	217.29	13317	16	218.42	13291	9
217	22904	33	217	22908	41	218.3	13212	4	219.44	13495	8
218	22997	36	218	22048	46	219.31	13229	13	220.46	13089	6
219	22549	39	219	21694	38	220.32	13788	5	221.47	12952	7
220	22768	32	220	22211	52	221.33	13871	13	222.49	13238	7
221	23023	31	221	22351	39	222.34	13519	9	223.5	13229	9
222	23097	25	222	22606	39	223.35	13191	12	224.52	13372	6
223	23492	33	223	22018	42	224.36	13181	13	225.54	13101	15
224	23360	37	224	22069	34	225.37	13272	15	226.55	12872	15
225	23799	28	225	22406	33	226.38	13337	9	227.57	13282	11
226	21596	38	226	22466	35	227.39	13262	5	228.58	13273	6
227	20920	31	227	23414	42	228.4	12855	10	229.6	13150	6
228	21315	30	228	22936	43	229.41	12943	10	230.62	13110	8
229	22730	25	229	22803	49	230.42	13089	12	231.63	12832	7
230	23377	28	230	23110	40	231.43	13538	13	232.65	12832	9
231	22935	36	231	22765	41	232.45	13302	5	233.66	12950	10
232	23320	36	232	22406	49	233.46	13199	6	234.68	13149	11
233	22580	25	233	23345	41	234.47	13191	15	235.69	13438	11
234	17904	24	234	22928	49	235.48	13393	12	236.71	13091	8
235	21886	19	235	23203	43	236.49	13127	16	237.73	13245	9
236	22584	26	236	22588	40	237.5	13260	17	238.74	13425	12
237	22128	32	237	22286	55	238.51	13509	6	239.76	13313	5
238	23183	27	238	22469	43	239.52	13369	7	240.77	12645	10
239	22954	25	239	22487	53	240.53	13396	8	241.79	12915	11
240	22925	31	240	22804	53	241.54	13553	9	242.81	12931	7
241	23240	19	241	23167	44	242.55	13413	7	243.82	13133	11
242	23495	47	242	22951	45	243.56	13282	6	244.84	13334	6
243	23573	43	243	22936	44	244.57	13433	8	245.85	13270	9
244	23681	31	244	23287	53	245.58	12899	16	246.87	13307	14
245	23490	36	245	23187	37	246.59	13252	16	247.89	13073	9
246	23655	45	246	21236	52	247.61	13271	11	248.9	13216	10
247	23956	27	247	6361	19	248.62	13255	10	249.92	13237	5
248	24004	40	248	15449	19	249.63	13388	11	250.93	13052	12
249	23525	37	249	22562	48	250.64	13487	8	251.95	13117	5
250	23598	42	250	23090	39	251.65	13545	7	252.97	12954	8
251	23758	26	251	22142	50	252.66	13408	10	253.98	13036	7
252	23616	44	252	23487	51	253.67	13009	10	255	13294	12
253	23484	37	253	23105	55	254.68	13161	4	256.01	13420	9
254	23793	42	254	22047	46	255.69	13165	18	257.03	13470	5
255	23765	32	255	22201	41	256.7	13257	17	258.05	13424	5
256	23302	34	256	22882	36	257.71	13266	5	259.06	13398	4
257	23035	30	257	23155	68	258.72	13207	16	260.08	13340	2
258	22904	27	258	23527	49	259.73	13484	5	261.09	13146	2
259	22782	33	259	22799	35	260.74	13283	12	262.11	13494	9
260	23042	35	260	22263	36	261.75	12177	20	263.12	13473	7
261	23630	30	261	22924	43	262.76	11654	8	264.14	13152	4
262	23597	39	262	23873	46	263.78	11541	16	265.16	13196	2
263	23362	28	263	22623	31	264.79	12846	12	266.17	13293	7
264	22962	29	264	22318	48	265.8	13267	11	267.19	13373	5
265	22526	37	265	22204	51	266.81	13415	11	268.2	13272	10
266	22929	48	266	22645	52	267.82	13241	17	269.22	13357	5
267	23040	27	267	22624	56	268.83	13266	10	270.24	13225	6
268	23137	41	268	22450	49	269.84	13058	5	271.25	13376	14
269	23525	36	269	22427	66	270.85	12951	11	272.27	13297	12
270	23347	28	270	22564	43	271.86	13242	11	273.28	13072	5
271	23016	37	271	22410	46	272.87	13395	12	274.3	13165	8
272	22753	32	272	22632	47	273.88	13338	9	275.32	13132	5
273	23213	37	273	22747	47	274.89	13300	10	276.33	13393	8
274	23273	38	274	22674	41	275.9	13370	19	277.35	13181	6
275	22606	35	275	22859	45	276.91	13116	10	278.36	13231	6
276	21009	34	276	23293	42	277.92	13093	15	279.38	12792	3
277	10515	18	277	22639	33	278.93	12459	7	280.4	13054	6
278	17252	30	278	23235	40	279.95	13062	8	281.41	12936	6
279	21478	42	279	23661	50	280.96	13006	10	282.43	13274	8
280	21970	31	280	23437	39	281.97	13255	10	283.44	13174	4
281	22447	39	281	24014	32	282.98	13125	20	284.46	13357	5
282	22732	34	282	22706	51	283.99	13332	14	285.48	12815	7
283	22725	33	283	22443	62	285	13384	9	286.49	13128	11
284	22026	45	284	22702	29	286.01	13478	10	287.51	13240	6
285	23090	45	285	22960	44	287.02	13246	9	288.52	13164	6
286	23603	45	286	22130	31	288.03	13171	5	289.54	13375	7
287	23206	39	287	22568	44	289.04	13211	13	290.55	13200	7
288	23600	38	288	20259	42	290.05	13292	13	291.57	13549	8
289	23885	47	289	22530	44	291.06	13293	15	292.59	13203	6
290	23475	41	290	22731	41	292.07	13435	16	293.6	12985	14
291	23183	45	291	22229	39	293.08	12992	14	294.62	13247	13
292	23181	28	292	22364	43	294.09	13379	19	295.63	13154	9
293	23333	35	293	22950	45	295.1	13095	18	296.65	12932	7
294	23113	30	294	23663	34	296.12	12827	15	297.67	12803	9
295	23585	44	295	23668	30	297.13	13054	11	298.68	12739	7
296	23270	40	296	22304	33	298.14	13479	8	299.7	13095	7
297	23393	42	297	22932	43	299.15	13586	10	300.71	13373	7
298	22848	43	298	22786	31	300.16	13353	14	301.73	13541	6
299	21643	41	299	22782	32	301.17	13372	16	302.75	13651	8
300	23052	43	300	22835	35	302.18	13511	9	303.76	13757	14
301	23105	40	301	22962	34	303.19	13063	17	304.78	13714	6
302	22998	34	302	23076	47	304.2	13007	14	305.79	13379	3
303	23440	35	303	22716	33	305.21	13498	11	306.81	13403	11
304	22912	39	304	22373	38	306.22	13336	16	307.83	13371	8
305	23557	37	305	23001	48	307.23	13744	4	308.84	13318	7
306	23461	37	306	22707	44	308.24	13721	2	309.86	13675	7
307	23122	34	307	22778	48	309.25	13421	8	310.87	13391	5
308	22867	44	308	22598	38	310.26	13674	14	311.89	13731	9
309	23091	34	309	22368	23	311.27	13676	16	312.91	13220	12
310	23760	35	310	22681	33	312.29	13668	11	313.92	13224	11
311	23886	44	311	23407	31	313.3	13901	10	314.94	13225	7
312	23776	44	312	23589	37	314.31	13878	11	315.95	12756	9
313	23773	39	313	23491	25	315.32	13240	13	316.97	13101	9
314	23750	38	314	22942	18	316.33	12041	14	317.98	13005	20
315	24277	21	315	22837	19	317.34	9564	13	319	12812	14
316	23655	24	316	22597	33	318.35	11076	3	320.02	13030	16
317	23308	39	317	21975	23	319.36	12979	10	321.03	13325	9
318	23666	34	318	21132	17	320.37	13277	4	322.05	13258	8
319	23928	45	319	22016	9	321.38	13400	7	323.06	13318	7
320	23570	34	320	22205	12	322.39	13846	16	324.08	13566	4
321	22545	39	321	23403	5	323.4	13691	16	325.1	13167	10
322	22680	23	322	22297	30	324.41	13169	10	326.11	12946	8
323	22617	38	323	22869	36	325.42	12719	12	327.13	12872	6
324	22257	29	324	23012	44	326.43	12935	7	328.14	12782	7
325	22580	27	325	22793	39	327.45	13219	12	329.16	12745	9
326	22920	34	326	22309	47	328.46	12971	9	330.18	12914	10
327	22965	55	327	22423	34	329.47	13161	17	331.19	12892	6
328	22558	29	328	23160	37	330.48	13192	12	332.21	13103	6
329	23817	32	329	23172	26	331.49	13338	12	333.22	13291	11
330	23513	34	330	22595	27	332.5	13308	14	334.24	13194	4
331	23407	24	331	22872	61	333.51	13321	20	335.26	13496	5
332	23244	28	332	22980	41	334.52	13153	21	336.27	13525	2
333	22993	38	333	22925	56	335.53	13235	18	337.29	13289	7
334	22646	34	334	23542	67	336.54	13423	10	338.3	13138	3
335	22665	50	335	23615	46	337.55	13525	17	339.32	13207	0
336	22261	32	336	21628	56	338.56	13314	9	340.34	13050	11
337	22778	35	337	22488	47	339.57	13334	9	341.35	13102	8
338	18117	43	338	22834	36	340.58	13433	14	342.37	13407	7
339	22479	31	339	22969	36	341.59	13406	9	343.38	13273	4
340	22842	47	340	22238	29	342.6	13530	15	344.4	12981	7
341	22581	37	341	22729	47	343.62	13537	15	345.41	13191	3
342	23121	32	342	22530	30	344.63	13268	19	346.43	13329	5
343	22883	35	343	22398	31	345.64	12979	15	347.45	13493	4
344	22881	27	344	22353	41	346.65	13043	12	348.46	13548	5
345	23145	41	345	22860	42	347.66	13377	8	349.48	13331	4
346	22949	33	346	23101	35	348.67	13337	7	350.49	13536	5
347	22570	38	347	22665	33	349.68	12575	4	351.51	13238	5
348	22545	36	348	22843	23	350.69	12415	6	352.53	13803	7
349	22702	30	349	22707	25	351.7	13291	16	353.54	13111	14
350	22556	27	350	22485	23	352.71	13306	9	354.56	13125	9
351	22613	33	351	22836	24	353.72	13435	6	355.57	13378	9
352	22923	44	352	22794	37	354.73	13245	5	356.59	13231	11
353	22618	38	353	22004	46	355.74	13064	6	357.61	12952	4
354	22850	42	354	22255	40	356.75	13053	12	358.62	13219	6
355	22622	31	355	22595	40	357.76	13318	18	359.64	12980	8
356	22920	33	356	22284	24	358.77	13463	13	360.65	13415	9
357	23061	41	357	22172	39	359.79	13247	9	361.67	13653	8
358	23609	51	358	22391	46	360.8	13110	17	362.69	13606	7
359	23430	41	359	21872	47	361.81	12998	17	363.7	13515	6
360	23061	26	360	22682	27	362.82	12670	10	364.72	13287	7
361	23344	34	361	22284	21	363.83	13227	9	365.73	13072	10
362	23172	21	362	22418	22	364.84	13126	13	366.75	13097	5
363	23941	35	363	18926	25	365.85	13229	15	367.77	13097	5
364	22573	20	364	12445	21	366.86	13184	8	368.78	13396	2
365	23131	36	365	14356	15	367.87	12875	19	369.8	13644	8
366	22998	37	366	20564	21	368.88	13268	14	370.81	13225	8
367	22499	60	367	22022	29	369.89	13217	12	371.83	13166	9
368	22535	51	368	22478	31	370.9	13537	12	372.84	13187	10
369	22674	38	369	22878	32	371.91	13202	14	373.86	12763	11
370	22521	40	370	22593	31	372.92	13285	19	374.88	12992	12
371	21845	49	371	22137	26	373.93	13146	9	375.89	13143	9
372	22657	66	372	22317	29	374.94	13092	11	376.91	13402	9
373	23076	48	373	22158	25	375.96	12895	15	377.92	13320	10
374	22956	51	374	21444	23	376.97	13140	8	378.94	13302	10
375	23271	54	375	22144	27	377.98	13035	13	379.96	13199	8
376	22763	61	376	22260	25	378.99	12804	14	380.97	12942	5
377	23082	61	377	21668	24	380	12963	20	381.99	12884	10
378	23294	54	378	22439	27	381.01	12595	11	383	13247	10
379	23619	43	379	22663	27	382.02	12722	11	384.02	13294	7
380	24069	30	380	21527	20	383.03	13000	8	385.04	13063	5
381	22812	40	381	22444	29	384.04	12956	20	386.05	13724	7
382	23083	41	382	22358	43	385.05	13065	16	387.07	13494	6
383	23484	34	383	22070	25	386.06	13159	9	388.08	13448	11
384	23910	56	384	23056	37	387.07	13340	17	389.1	13226	11
385	23220	48	385	22655	17	388.08	12919	11	390.12	12995	8
386	23702	54	386	21744	25	389.09	13057	11	391.13	13483	8
387	23108	38	387	22170	29	390.1	13191	13	392.15	13189	9
388	22649	48	388	21203	123	391.11	13318	10	393.16	13304	12
389	22902	48	389	22130	115	392.13	13323	6	394.18	13740	7
390	22714	68	390	21976	22	393.14	12788	7	395.2	13322	2
391	22958	52	391	21349	20	394.15	13063	5	396.21	13383	6
392	23444	32	392	19737	31	395.16	12978	15	397.23	13774	6
393	23141	46	393	12856	19	396.17	12962	11	398.24	13570	6
394	23023	44	394	15312	13	397.18	12777	9	399.26	13304	6
395	22896	47	395	18840	25	398.19	12946	13	400.27	13324	5
396	23408	39	396	20633	30	399.2	13093	7	401.29	13558	8
397	23185	46	397	20674	18	400.21	13263	16	402.31	13629	5
398	22884	42	398	19343	29	401.22	13030	16	403.32	13291	3
399	23476	38	399	17287	11	402.23	12942	14	404.34	12880	3
400	23165	49	400	17116	9	403.24	12673	16	405.35	13466	1
401	23563	61	401	19151	19	404.25	12948	14	406.37	13539	5
402	23272	46	402	18156	24	405.26	13036	17	407.39	13367	4
403	22927	47	403	10280	17	406.27	13056	18	408.4	13411	12
404	22777	58	404	2536	4	407.29	13002	16	409.42	13381	10
405	23100	76	405	6119	6	408.3	12775	11	410.43	13260	9
406	23431	55	406	7312	5	409.31	12552	17	411.45	13170	4
407	23840	56	407	5762	3	410.32	13207	14	412.47	13309	2
408	23818	42	408	6131	20	411.33	13386	18	413.48	13538	6
409	23150	57	409	10247	5	412.34	13170	12	414.5	13320	6
410	22977	68	410	13973	21	413.35	13494	12	415.51	13355	6
411	22916	54	411	15889	22	414.36	13473	18	416.53	13404	10
412	23309	41	412	13021	17	415.37	13624	12	417.55	13220	11
413	23575	52	413	3053	18	416.38	13729	8	418.56	13379	4
414	22900	48	414	931	6	417.39	13505	7	419.58	13272	3
415	23441	57	415	288	4	418.4	13536	5	420.59	13358	5
416	23079	67	416	149	2	419.41	13557	15	421.61	13292	7
417	22411	55	417	124	3	420.42	13628	13	422.63	13127	4
418	22286	55	418	243	5	421.43	13747	11	423.64	13581	7
419	22285	59	419	123	5	422.44	13691	11	424.66	13630	3
420	22950	46	420	653	6	423.46	13717	16	425.67	13556	3
421	22402	51	421	3733	4	424.47	13507	11	426.69	13530	4
422	22691	47	422	2646	6	425.48	13670	7	427.7	13344	14
423	22822	56	423	1006	5	426.49	13719	6	428.72	13406	5
424	22700	44	424	469	4	427.5	13792	11	429.74	13333	8
425	22827	53	425	471	3	428.51	13746	15	430.75	13649	5
426	22684	55	426	1215	2	429.52	13500	13	431.77	13681	4
427	23388	41	427	641	1	430.53	13407	14	432.78	13690	4
428	23532	45	428	651	6	431.54	13738	11	433.8	13377	3
429	23850	54	429	438	5	432.55	13670	9	434.82	13568	6
430	23494	42	430	209	4	433.56	13731	12	435.83	13521	3
431	23243	40	431	227	1	434.57	13423	5	436.85	13184	8
432	23295	43	432	222	3	435.58	13445	9	437.86	13197	3
433	23449	44	433	422	3	436.59	13306	5	438.88	13311	7
434	23876	46	434	112	2	437.6	13459	14	439.9	12984	8
435	23361	46	435	214	3	438.61	13349	4	440.91	13082	4
436	22559	41	436	336	3	439.63	13122	13	441.93	13092	12
437	16637	34	437	206	7	440.64	12918	17	442.94	13093	8
438	21485	36	438	159	6	441.65	13061	5	443.96	13092	3
439	21197	28	439	74	5	442.66	13047	19	444.98	13250	6
440	20414	26	440	62	3	443.67	12567	15	445.99	13587	7
441	21092	45	441	56	3	444.68	12876	12	447.01	13628	6
442	20197	39	442	110	0	445.69	13076	14	448.02	13606	13
443	22278	33	443	163	4	446.7	12954	5	449.04	13431	8
444	22474	43	444	87	3	447.71	12695	23	450.06	13147	8
445	22740	45	445	80	4	448.72	13033	12	451.07	13252	12
446	23290	52	446	118	8	449.73	13135	22	452.09	13649	5
447	23193	34	447	170	1	450.74	13157	23	453.1	13375	2
448	22589	51	448	709	2	451.75	13297	14	454.12	13206	6
449	22286	45	449	282	5	452.76	13132	11	455.13	13255	4
450	21380	45	450	123	7	453.77	13456	20	456.15	13393	5
451	22016	31	451	68	5	454.78	13154	10	457.17	13242	7
452	23164	41	452	35	1	455.8	12978	12	458.18	13487	5
453	22989	41	453	50	3	456.81	13040	8	459.2	13437	9
454	22335	38	454	68	1	457.82	13450	13	460.21	13536	5
455	23377	40	455	72	2	458.83	13118	14	461.23	13233	7
456	22825	37	456	64	1	459.84	12989	11	462.25	13402	4
457	21069	26	457	32	5	460.85	13046	17	463.26	13273	4
458	14822	26	458	39	3	461.86	13185	16	464.28	13090	8
459	12780	22	459	49	3	462.87	12974	12	465.29	13151	5
460	20656	38	460	42	4	463.88	13083	7	466.31	13172	4
461	21366	30	461	57	2	464.89	13045	11	467.33	13317	5
462	21701	40	462	35	4	465.9	13066	13	468.34	13461	7
463	21240	40	463	42	4	466.91	12995	25	469.36	13354	5
464	21790	40	464	35	3	467.92	13248	20	470.37	13166	5
465	22072	29	465	54	2	468.93	13476	14	471.39	13177	6
466	22984	39	466	74	4	469.94	13095	13	472.41	13280	5
467	22515	42	467	60	6	470.95	13528	13	473.42	13415	9
468	23014	42	468	30	3	471.97	13517	6	474.44	13248	7
469	23212	30	469	38	2	472.98	13464	14	475.45	13460	4
470	22799	39	470	38	5	473.99	13055	20	476.47	13323	6
471	19014	39	471	34	3	475	13102	10	477.49	13305	6
472	22347	28	472	52	4	476.01	13213	13	478.5	13551	5
473	22427	47	473	42	1	477.02	12949	9	479.52	13829	4
474	23062	43	474	52	3	478.03	13229	11	480.53	13707	9
475	23347	49	475	55	4	479.04	13450	14	481.55	13578	9
476	22536	41	476	54	3	480.05	13250	10	482.56	13224	5
477	22784	31	477	46	4	481.06	13414	16	483.58	13145	12
478	22609	49	478	41	1	482.07	13106	20	484.6	13274	8
479	23410	48	479	42	5	483.08	13034	16	485.61	13412	2
480	22811	44	480	37	1	484.09	13283	7	486.63	13071	6
481	23485	52	481	55	1	485.1	13156	14	487.64	12887	10
482	23774	47	482	47	4	486.11	13285	17	488.66	13069	5
483	23142	33	483	49	1	487.13	13301	21	489.68	12951	5
484	23454	45	484	45	2	488.14	13236	11	490.69	13287	4
485	23458	53	485	40	7	489.15	13332	15	491.71	13586	7
486	23724	49	486	51	4	490.16	12786	10	492.72	13675	5
487	23460	52	487	67	6	491.17	13226	12	493.74	13499	5
488	23501	54	488	24	4	492.18	13236	10	494.76	13465	12
489	23647	59	489	82	1	493.19	12942	9	495.77	13485	8
490	23497	47	490	54	2	494.2	13046	10	496.79	12984	14
491	22987	36	491	55	4	495.21	13291	13	497.8	13143	7
492	22566	22	492	42	3	496.22	13390	14	498.82	13520	3
493	22336	31				497.23	13281	15	499.84	13528	10
494	22534	32				498.24	13339	8	500.85	13380	7
495	22899	32				499.25	13335	10	501.87	13221	6
496	22969	40				500.26	13301	13	502.88	13283	10
497	23179	39				501.27	13097	10	503.9	12275	13
498	23274	42				502.28	12668	7	504.92	12508	9
499	23350	52				503.3	12918	11	505.93	13353	7
500	23828	49				504.31	13447	10	506.95	12587	16
501	24143	54				505.32	13461	13	507.96	13002	10
502	23502	46				506.33	13444	10	508.98	13150	3
503	23424	45				507.34	13730	13	509.99	13293	7
504	22817	52				508.35	13441	15	511.01	13159	6
505	23033	47				509.36	13544	6	512.03	13323	10
506	23579	58				510.37	13194	11	513.04	13437	11
507	23194	31				511.38	13226	15	514.06	13439	9
508	22842	46				512.39	13235	13	515.07	13637	6
509	23002	42				513.4	13535	8	516.09	13326	7
510	23190	54				514.41	13408	9	517.11	13337	4
511	23093	38				515.42	13279	8	518.12	13087	6
512	22808	36				516.43	13507	12	519.14	11890	12
513	22472	41				517.44	13327	8	520.15	13024	17
514	22808	37				518.45	12966	12	521.17	13442	8
515	23128	36				519.47	12044	8	522.19	13307	7
516	22530	32				520.48	13151	8	523.2	13509	4
517	22606	38				521.49	13091	10	524.22	13516	11
518	23017	49				522.5	13361	15	525.23	13047	8
519	22938	31				523.51	13302	12	526.25	12687	10
520	21984	27				524.52	12840	13	527.27	13058	6
521	22552	50				525.53	12984	11	528.28	13076	4
522	23013	28				526.54	12975	19	529.3	13412	11
523	23035	37				527.55	12680	14	530.31	13453	7
524	23188	17				528.56	12385	19	531.33	13515	7
525	22307	24				529.57	12314	9	532.35	13123	4
526	19397	18				530.58	13237	18	533.36	13299	12
527	17724	16				531.59	13041	10	534.38	13515	12
528	18883	41				532.6	13014	13	535.39	13459	6
529	21050	32				533.61	13000	18	536.41	13426	8
530	21378	38				534.62	13198	9	537.42	13320	4
531	20616	60				535.64	13304	10	538.44	13392	8
532	20253	41				536.65	13018	9	539.46	13427	7
533	20334	31				537.66	13048	9	540.47	13504	8
534	19806	16				538.67	12875	10	541.49	13428	8
535	18879	22				539.68	12866	19	542.5	13129	7
536	18609	48				540.69	13067	16	543.52	13016	8
537	19399	48				541.7	12952	12	544.54	12920	10
538	18851	38				542.71	13095	6	545.55	13157	5
539	18444	38				543.72	13150	14	546.57	13165	7
540	20534	49				544.73	13329	17	547.58	13111	8
541	20667	43				545.74	13403	19	548.6	13007	10
542	20071	49				546.75	13247	19	549.62	12764	3
543	20462	46				547.76	12855	18	550.63	12889	7
544	19082	21				548.77	13190	13	551.65	12836	7
545	19107	24				549.78	13239	12	552.66	13263	10
546	15862	34				550.79	13106	9	553.68	13278	6
547	19516	26				551.81	13006	13	554.7	13552	2
548	22802	19				552.82	13267	14	555.71	13423	2
549	22795	29				553.83	13377	14	556.73	13517	4
550	21827	19				554.84	12933	14	557.74	13304	6
551	23000	16				555.85	13046	13	558.76	13260	7
552	21873	17				556.86	13113	14	559.78	13340	6
553	22803	14				557.87	13250	15	560.79	13510	11
554	21833	14				558.88	13178	9	561.81	13293	12
555	22143	31				559.89	12879	15	562.82	12802	3
556	22446	22				560.9	13247	9	563.84	13043	9
557	23139	48				561.91	13366	12	564.85	13012	5
558	22831	34				562.92	13469	13	565.87	13359	5
559	22902	45				563.93	13263	8	566.89	13295	4
560	23231	46				564.94	13042	10	567.9	13236	6
561	22469	47				565.95	13041	11	568.92	13456	4
562	21740	42				566.97	13288	13	569.93	13401	3
563	22135	44				567.98	13066	15	570.95	13188	3
564	23029	51				568.99	13350	17	571.97	13446	4
565	23047	31				570	13282	17	572.98	13289	5
566	23028	36				571.01	13454	11	574	13252	7
567	22921	30				572.02	13337	12	575.01	13228	4
568	23566	34				573.03	13255	10	576.03	13470	10
569	23487	41				574.04	13126	10	577.05	13296	9
570	23609	52				575.05	13501	13	578.06	13470	7
571	23188	58				576.06	13238	13	579.08	13253	6
572	23004	58				577.07	13305	9	580.09	13546	7
573	23508	54				578.08	13255	9	581.11	13613	4
574	23884	53				579.09	12418	9	582.13	13466	9
575	23734	28				580.1	11512	8	583.14	13480	4
576	23668	45				581.11	13155	18	584.16	13440	6
577	22920	46				582.12	13221	10	585.17	12703	6
578	23526	52				583.14	13211	11	586.19	9456	6
579	22946	66				584.15	13275	15	587.21	8934	6
580	20584	40				585.16	13457	12	588.22	8870	8
581	22958	48				586.17	13335	12	589.24	11926	5
582	23540	45				587.18	12967	14	590.25	13222	10
583	23310	36				588.19	13266	11	591.27	13468	10
584	23343	32				589.2	13100	13	592.28	13299	8
585	24108	33				590.21	12909	14	593.3	13178	3
586	23108	57				591.22	13256	9	594.32	13325	9
587	23535	50				592.23	13298	12	595.33	13197	13
588	23546	37				593.24	12991	13	596.35	13201	4
589	23674	47				594.25	13150	16	597.36	13188	10
590	23815	44				595.26	13120	13	598.38	12915	13
591	24081	55				596.27	12963	18	599.4	13129	10
592	23506	55				597.28	13001	8	600.41	13133	6
593	23644	58				598.29	12953	21	601.43	13334	11
594	23403	38				599.31	12985	10	602.44	13552	8
595	22851	34				600.32	12869	17	603.46	13445	5
596	23002	37				601.33	12996	10	604.48	12767	15
597	22931	47				602.34	12737	20	605.49	12927	12
598	22410	40				603.35	13262	18	606.51	13069	11
599	23680	46				604.36	13258	18	607.52	13226	3
600	23242	30				605.37	13257	12	608.54	13163	11
601	23945	25				606.38	13226	18	609.56	13169	9
602	23727	17				607.39	13288	14	610.57	13340	9
603	23685	19				608.4	13306	10	611.59	13167	6
604	23539	33				609.41	13060	8	612.6	13401	8
605	23448	35				610.42	13005	7	613.62	13506	3
606	23565	45				611.43	13125	10	614.64	13592	2
607	23368	55				612.44	12787	4	615.65	13542	5
608	23368	52				613.45	12902	11	616.67	13139	11
609	23502	41				614.46	12691	9	617.68	13311	6
610	23689	30				615.48	12950	10	618.7	13583	1
611	24280	41				616.49	13465	7	619.71	13500	7
612	23461	40				617.5	13028	9	620.73	12935	4
613	24061	40				618.51	13039	15	621.75	12783	8
614	24240	41				619.52	13088	12	622.76	12831	9
615	23946	29				620.53	13497	12	623.78	12861	8
616	23699	30				621.54	13472	20	624.79	12885	8
617	22706	43				622.55	13264	16	625.81	13450	6
618	22726	54				623.56	13131	13	626.83	13404	5
619	22127	67				624.57	13194	16	627.84	13730	2
620	23329	75				625.58	13179	6	628.86	13708	5
621	23815	53				626.59	13305	15	629.87	13699	3
622	23628	59				627.6	13468	9	630.89	13287	4
623	23589	48				628.61	13329	13	631.91	13269	4
624	23203	41				629.62	13408	6	632.92	13090	7
625	23004	26				630.63	13289	11	633.94	13454	11
626	23408	34				631.65	12869	9	634.95	13608	7
627	23359	30				632.66	13001	9	635.97	13713	3
628	23702	33				633.67	12808	8	636.99	13156	6
629	23189	39				634.68	13341	6	638	13446	5
630	22909	48				635.69	13118	10	639.02	13447	7
631	22508	40				636.7	13125	12	640.03	13348	10
632	22655	61				637.71	12802	15	641.05	13738	4
633	22752	62				638.72	12903	13	642.07	13474	7
634	22645	58				639.73	13003	13	643.08	13466	9
635	22862	52				640.74	13358	7	644.1	13447	5
636	22153	53				641.75	12714	11	645.11	13511	8
637	19490	55				642.76	13262	15	646.13	13641	5
638	22135	40				643.77	13619	6	647.14	13205	7
639	23088	51				644.78	13459	5	648.16	13196	8
640	23302	48				645.79	13099	12	649.18	13297	15
641	22842	58				646.81	13061	9	650.19	13193	7
642	22980	39				647.82	12997	10	651.21	13401	4
643	23592	59				648.83	13124	13	652.22	13505	16
644	23510	44				649.84	12925	11	653.24	13145	6
645	23394	40				650.85	13313	18	654.26	13277	4
646	22926	46				651.86	13404	19	655.27	13118	6
647	22020	39				652.87	13120	11	656.29	13573	5
648	21941	51				653.88	12808	5	657.3	13596	6
649	21708	51				654.89	13080	14	658.32	13224	6
650	22193	58				655.9	12792	7	659.34	13070	8
651	22601	35				656.91	12989	12	660.35	13206	10
652	22805	49				657.92	12753	10	661.37	13331	3
653	23322	43				658.93	13396	11	662.38	13040	4
654	23415	39				659.94	13159	13	663.4	12776	7
655	23380	38				660.95	13071	15	664.42	12883	7
656	23022	34				661.96	12988	16	665.43	13358	7
657	23364	41				662.98	13008	8	666.45	13497	6
658	23030	53				663.99	13052	11	667.46	13444	9
659	23235	58				665	13404	9	668.48	13318	4
660	23634	47				666.01	13289	9	669.5	13428	6
661	23426	64				667.02	13435	9	670.51	13517	9
662	23841	51				668.03	13116	16	671.53	13395	6
663	24020	62				669.04	13468	6	672.54	13174	4
664	24033	36				670.05	13199	9	673.56	13470	9
665	23822	40				671.06	12885	13	674.57	13260	5
666	23465	30				672.07	13243	12	675.59	13416	8
667	22794	53				673.08	12924	18	676.61	13238	14
668	23024	65				674.09	12867	12	677.62	13453	5
669	23809	48				675.1	13129	15	678.64	13775	1
670	23681	59				676.11	13619	8	679.65	13782	11
671	23840	53				677.12	13486	10	680.67	13228	15
672	23702	45				678.13	13581	14	681.69	13236	8
673	23331	70				679.15	12998	10	682.7	13456	8
674	23465	61				680.16	13032	9	683.72	13641	6
675	23934	60				681.17	13231	8	684.73	13599	6
676	23873	58				682.18	13207	8	685.75	13581	1
677	23428	68				683.19	13163	7	686.77	13483	2
678	23604	45				684.2	13421	11	687.78	13523	7
679	23389	50				685.21	13245	8	688.8	12809	6
680	23643	40				686.22	13266	12	689.81	12851	11
681	23565	40				687.23	13372	11	690.83	13429	11
682	24294	39				688.24	13043	13	691.85	13130	13
683	23465	38				689.25	13216	8	692.86	13323	9
684	23482	55				690.26	13064	9	693.88	13444	8
685	23508	49				691.27	13249	12	694.89	13635	6
686	23486	56				692.28	13363	8	695.91	13612	15
687	24054	39				693.29	13499	8	696.93	13658	10
688	24163	38				694.3	13731	7	697.94	13858	4
689	23509	53				695.32	13457	5	698.96	13634	2
690	23132	36				696.33	12986	7	699.97	13661	8
691	19909	53				697.34	12722	11	700.99	13529	7
692	22748	69				698.35	13156	9	702	13481	7
693	23085	52				699.36	13223	9	703.02	13342	6
694	23661	72				700.37	13111	7	704.04	13674	6
695	23714	51				701.38	13326	8	705.05	13461	5
696	24076	48				702.39	13345	11	706.07	13369	4
697	23659	37				703.4	13115	19	707.08	13605	6
698	23185	41				704.41	12987	16	708.1	13840	12
699	23584	32				705.42	13078	7	709.12	13612	4
700	23460	39				706.43	12991	9	710.13	13363	5
701	23748	41				707.44	13195	10	711.15	13735	4
702	23656	61				708.45	13271	12	712.16	13777	6
703	24570	39				709.46	13317	9	713.18	12889	5
704	24404	63				710.48	13182	7	714.2	12421	2
705	24128	50				711.49	13089	9	715.21	13230	12
706	23375	49				712.5	13233	7	716.23	13330	6
707	23562	45				713.51	12945	14	717.24	13384	4
708	22050	39				714.52	12704	8	718.26	13675	8
709	21043	39				715.53	12882	16	719.28	13608	7
710	22892	45				716.54	13049	9	720.29	13332	9
711	23113	54				717.55	12980	13	721.31	13234	4
712	23292	56				718.56	13055	14	722.32	13485	6
713	23200	36				719.57	12949	19	723.34	13304	5
714	23336	49				720.58	13035	16	724.36	13454	8
715	23885	61				721.59	13346	10	725.37	13422	4
716	24167	56				722.6	13393	13	726.39	13312	3
717	23798	58				723.61	13316	13	727.4	13416	12
718	23958	48				724.62	13216	11	728.42	13184	8
719	23193	55				725.63	13244	15	729.43	13041	7
720	22805	71				726.65	13556	9	730.45	13126	10
721	22611	44				727.66	13111	10	731.47	13241	7
722	23477	47				728.67	13127	15	732.48	13247	11
723	23793	37				729.68	13375	15	733.5	13429	4
724	24261	29				730.69	13258	13	734.51	12811	6
725	24467	20				731.7	13188	11	735.53	13173	11
726	23805	24				732.71	13256	9	736.55	13108	10
727	23272	32				733.72	13138	13	737.56	13115	3
728	23267	25				734.73	13264	11	738.58	13073	7
729	23849	19				735.74	13288	13	739.59	12944	5
730	24026	24				736.75	13320	10	740.61	12864	4
731	23796	26				737.76	13527	14	741.63	13033	2
732	23619	29				738.77	13292	10	742.64	13070	4
733	23272	42				739.78	13270	12	743.66	13372	2
734	22787	50				740.79	13186	10	744.67	13046	3
735	23016	36				741.8	13230	11	745.69	13096	5
736	23692	32				742.82	13476	9	746.71	12871	8
737	23610	26				743.83	13678	11	747.72	12889	8
738	22709	34				744.84	13280	10	748.74	12990	9
739	23198	31				745.85	13373	13	749.75	13314	6
740	22582	26				746.86	13493	12	750.77	13427	13
741	23373	32				747.87	13597	16	751.79	13608	4
742	22972	46				748.88	13523	19	752.8	13468	6
743	22709	48				749.89	13530	15	753.82	13191	7
744	21731	37				750.9	13396	14	754.83	13232	4
745	22344	53				751.91	13250	16	755.85	13479	8
746	22769	33				752.92	13449	19	756.86	13375	6
747	22797	51				753.93	13192	15	757.88	13227	4
748	23879	35				754.94	12981	13	758.9	13179	14
749	23871	38				755.95	13245	15	759.91	13018	10
750	23684	31				756.96	13256	12	760.93	13171	4
751	22123	38				757.97	13241	7	761.94	13221	6
752	16229	30				758.99	13361	14	762.96	13524	16
753	7062	20				760	12814	6	763.98	13390	12
754	11825	31				761.01	12863	8	764.99	13392	8
755	13415	34				762.02	13016	5	766.01	13523	9
756	21129	37				763.03	12721	3	767.02	13406	6
757	22883	47				764.04	11714	3	768.04	13293	9
758	23441	35				765.05	10751	1	769.06	13143	9
759	22744	37				766.06	9761	2	770.07	13262	11
760	23112	26				767.07	3633	0	771.09	13224	8
761	23294	43				768.08	509	3	772.1	13376	3
762	23142	42				769.09	375	3	773.12	13217	8
763	22807	44				770.1	646	0	774.14	13172	5
764	23280	41				771.11	672	2	775.15	13433	4
765	22411	30				772.12	376	1	776.17	13242	2
766	18495	34				773.13	338	1	777.18	13166	6
767	23434	27				774.14	423	1	778.2	13179	3
768	23633	24				775.16	206	2	779.22	13157	6
769	23721	32				776.17	260	1	780.23	13340	4
770	23991	26				777.18	161	2	781.25	13248	0
771	23413	29				778.19	175	1	782.26	13296	1
772	23347	22				779.2	182	0	783.28	13673	2
773	23485	32				780.21	238	0	784.29	13589	1
774	23108	43				781.22	264	2	785.31	13324	3
775	23556	24				782.23	242	0	786.33	13603	4
776	23583	17				783.24	352	1	787.34	13074	11
777	23788	44				784.25	425	4	788.36	13163	5
778	23952	32				785.26	778	2	789.37	13528	6
779	23963	46				786.27	2680	4	790.39	13410	7
780	23638	41				787.28	5872	2	791.41	13436	8
781	22957	28				788.29	10271	0	792.42	13536	7
782	22583	41				789.3	11539	2	793.44	13377	5
783	23276	37				790.32	11799	4	794.45	13170	4
784	23547	43				791.33	12324	1	795.47	13118	6
785	23686	42				792.34	12387	6	796.49	13318	7
786	23582	54				793.35	12748	7	797.5	12804	6
787	23556	29				794.36	11492	5	798.52	13195	6
788	23618	38				795.37	6805	1	799.53	13331	6
789	23698	54				796.38	1909	1	800.55	13330	5
790	23721	63				797.39	551	1	801.57	13372	4
791	23697	45				798.4	221	0	802.58	13250	6
792	24246	48				799.41	146	0	803.6	13059	5
793	24072	31				800.42	218	1	804.61	13108	3
794	24114	31				801.43	285	2	805.63	13127	5
795	24343	30				802.44	657	2	806.65	12991	10
796	25016	33				803.45	1985	3	807.66	12914	3
797	24180	22				804.46	8964	3	808.68	12998	11
798	23920	25				805.47	13040	3	809.69	12968	5
799	24010	24				806.49	12863	2	810.71	13251	3
800	23510	13				807.5	13103	4	811.72	12884	6
801	23173	14				808.51	13212	3	812.74	12785	7
802	23425	22				809.52	13228	4	813.76	13420	7
803	23045	26				810.53	13701	4	814.77	13599	5
804	22488	59				811.54	13643	1	815.79	13721	6
805	22588	26				812.55	13616	3	816.8	13596	5
806	22984	66				813.56	12995	0	817.82	13551	5
807	23356	57				814.57	13131	2	818.84	13682	7
808	23692	53				815.58	13164	1	819.85	13493	6
809	23795	43				816.59	13119	3	820.87	13653	2
810	23130	46				817.6	13245	3	821.88	13511	5
811	23262	38				818.61	13170	1	822.9	13425	7
812	22834	39				819.62	13429	2	823.92	13466	10
813	23014	28				820.63	13476	2	824.93	13100	13
814	23338	24				821.64	13194	5	825.95	13469	9
815	22976	22				822.66	12934	0	826.96	13331	3
816	22617	28				823.67	13070	1	827.98	13337	9
817	23073	64				824.68	13134	4	829	13186	9
818	23251	62				825.69	13170	2	830.01	13330	5
819	23275	62				826.7	12894	3	831.03	13591	7
820	22804	51				827.71	13028	1	832.04	13545	3
821	23594	37				828.72	13227	3	833.06	13558	6
822	23836	31				829.73	12183	3	834.08	13289	8
823	23457	23				830.74	10527	4	835.09	13103	4
824	23961	25				831.75	8559	1	836.11	13139	8
825	24279	21				832.76	2361	2	837.12	13077	6
826	23839	15				833.77	1065	0	838.14	12873	6
827	24340	33				834.78	1164	0	839.15	12977	9
828	24415	30							840.17	13043	5
829	23589	30							841.19	13291	3
830	23899	40							842.2	13224	6
831	22817	78							843.22	12725	5
832	23164	65							844.23	13109	9
833	23015	62							845.25	13184	11
834	22601	67							846.27	13129	7
835	22936	62							847.28	13417	1
836	23085	59							848.3	13509	7
837	22487	53							849.31	13185	6
838	20653	41							850.33	13291	11
839	22841	36							851.35	13142	14
840	23242	37							852.36	13308	13
841	23511	48							853.38	13243	10
842	21411	36							854.39	13157	7
843	23166	51							855.41	12915	6
844	22411	62							856.43	13195	7
845	22676	46							857.44	12935	5
846	23141	54							858.46	12953	18
847	23355	57							859.47	13118	4
848	23374	52							860.49	12914	11
849	23893	50							861.51	12748	7
850	23172	47							862.52	12611	9
851	23472	72							863.54	11252	26
852	24071	52							864.55	5245	61
853	23433	27							865.57	945	5
854	23226	53							866.58	328	1
855	23638	61							867.6	437	1
856	23559	58							868.62	310	3
857	22955	44							869.63	241	2
858	23715	59							870.65	337	0
859	22704	56							871.66	336	0
860	22521	55							872.68	167	0
861	23289	32							873.7	125	3
862	23258	51							874.71	134	1
863	23280	53							875.73	194	0
864	22890	51							876.74	159	1
865	23517	65							877.76	172	1
866	23493	44							878.78	155	0
867	22848	46							879.79	113	0
868	22585	56							880.81	117	1
869	22959	45							881.82	165	0
870	22986	55							882.84	135	2
871	22840	38							883.86	137	4
872	22810	40							884.87	234	3
873	22201	50							885.89	1717	1
874	22746	41							886.9	4059	0
875	23733	82							887.92	1194	2
876	24367	45							888.94	482	2
877	24060	51							889.95	242	2
878	24197	43							890.97	224	6
879	24040	45							891.98	725	39
880	23743	48							893	4737	318
881	24049	51							894.01	10355	855
882	23491	48							895.03	11484	1085
883	23905	42							896.05	7402	733
884	24020	36							897.06	2620	246
885	23893	37							898.08	392	36
886	23879	36							899.09	189	5
887	23543	29							900.11	159	0
888	23422	34							901.13	147	2
889	23321	32							902.14	155	2
890	23325	24							903.16	136	2
891	23323	21							904.17	104	3
892	22568	27							905.19	131	0
893	22966	33							906.21	154	2
894	22754	49							907.22	306	1
895	22890	66							908.24	524	4
896	23282	68							909.25	474	2
897	22963	101							910.27	376	3
898	22035	626							911.29	300	1
899	22911	289							912.3	566	1
900	22502	83							913.32	1643	3
901	22817	63							914.33	5016	0
902	23162	48							915.35	10470	1
903	23139	124							916.37	12477	6
904	23263	65							917.38	12287	3
905	23517	63							918.4	12045	4
906	24031	66							919.41	12408	4
907	23547	68							920.43	11617	2
908	23422	77							921.44	12300	5
909	23434	69							922.46	13393	0
910	23795	89							923.48	13289	4
911	23938	89							924.49	13208	3
912	23341	90							925.51	13141	1
913	22542	69							926.52	12211	2
914	22874	44							927.54	7501	3
915	23220	77							928.56	7217	3
916	22853	83							929.57	10986	6
917	22688	67							930.59	12668	1
918	22335	38							931.6	12428	3
919	23686	57							932.62	11007	3
920	21938	25							933.64	11977	5
921	22150	8							934.65	12823	5
922	22271	14							935.67	12379	1
923	22935	7							936.68	11310	2
924	22474	8							937.7	10639	3
925	22392	12							938.72	7918	1
926	22397	12							939.73	5930	0
927	21782	12							940.75	4908	3
928	19639	9
929	21780	12
930	22710	15
931	23419	25
932	23259	14
933	23454	9
934	24134	14
935	24616	10
936	24926	11
937	24041	13
938	23050	11
939	23121	9
940	23295	10
941	23213	6
942	22749	13
943	22878	11
944	23029	5
945	22736	23
946	22662	15
947	22497	12
948	24174	7
949	24470	9
950	23921	9
951	23932	11
952	22923	10
953	23458	8
954	24228	18
955	24215	14
956	23748	14
957	23610	9
958	22848	4
959	22414	10
960	22085	7
961	21862	7
962	22067	4
963	22450	11
964	23062	13
965	23717	8
966	23149	12
967	22918	12
968	23200	11
969	23735	16
970	23848	17
971	24085	7
972	23921	11
973	24035	13
974	23586	12
975	24194	5
976	23895	11
977	23781	12
978	23172	16
979	23411	11
980	24081	20
981	23254	14
982	23103	14
983	22495	11
984	21768	19
985	18835	19
986	20403	29
987	20040	32
988	11889	90
989	5915	169
990	3979	117
991	4641	217
992	8631	501
993	13114	164
994	17719	37
995	19153	21
996	21381	13
997	18745	14
998	11223	26
999	12273	23
1000	10820	31
1001	4704	35
1002	1432	27
1003	1043	23
1004	1298	29
1005	1692	27
1006	3084	38
1007	3826	26
1008	3252	27
1009	1755	23
1010	1693	11
1011	2866	13
1012	9631	16
1013	19505	13
1014	20459	14
1015	22091	16
1016	20775	15
1017	9010	22
1018	2512	48
1019	1252	53
1020	1260	34
1021	631	35
1022	597	34
1023	681	54
1024	495	19
1025	369	18
1026	444	19
1027	477	10
1028	628	15
1029	422	38
1030	368	22
1031	823	7
1032	9002	14
1033	20667	19
1034	21337	14
1035	22538	8
1036	23085	8
1037	22052	21
1038	21910	18
1039	20233	16
1040	16770	68
1041	2914	51
1042	1244	14
1043	677	15
1044	350	13
1045	450	8
1046	1652	18
1047	494	30
1048	1144	15
1049	894	16
1050	493	14
1051	403	12
1052	488	19
1053	498	12
1054	344	28
1055	321	7
1056	398	17
1057	427	13
1058	339	13
1059	1122	23
1060	1315	24
1061	932	17
1062	399	12
1063	356	7
1064	414	22
1065	672	14
1066	1336	29
1067	968	13
1068	292	6
1069	256	12
1070	491	10
1071	569	7
1072	281	7
1073	372	6
1074	476	13
1075	996	17
1076	813	14
1077	631	22
1078	518	24
1079	326	10
1080	374	17
1081	308	10
1082	252	5
1083	323	20
1084	482	18
1085	467	12
1086	477	17
1087	651	27
1088	363	16
1089	335	18
1090	615	44
1091	380	21
1092	376	12
1093	307	25
1094	550	96
1095	656	290
1096	462	23
1097	564	14
1098	536	16
1099	417	16
1100	434	23
1101	504	18
1102	412	20
1103	530	30
1104	540	16
1105	325	7
1106	123	11
1107	204	7
1108	211	4
1109	174	7
1110	181	9
1111	266	10
1112	140	9
1113	394	17
1114	414	15
1115	397	12
1116	549	25
1117	686	41
1118	1653	45
1119	1481	38
1120	1399	24
1121	1938	30
1122	1102	16
1123	794	12
1124	441	9
1125	190	10
1126	170	6
1127	299	6
1128	375	13
1129	301	10
1130	408	11
1131	511	23
1132	489	22
1133	419	18
1134	366	22
1135	363	13
1136	619	18
1137	331	14
