# Supplementary material for: Fossil eggshell cuticle elucidates dinosaur nesting ecology
Source: PeerJ. 2018 Jul 6;6:e5144. doi: 10.7717/peerj.5144 (PMC6037156; doi:10.7717/peerj.5144)
Supplement: Data S2 — Raw data from Raman analyses of Macroolithus yaotunensis eggshells from Jiangxi, Henan, and Guangdong Provinces of China, Triprismatoolithus eggshell from Montana, USA, and the associated sediments to each eggshell samples. Two crocodilian eggshells from Crocodylia porosus and Tomistoma schlegelii are also included in this study. [file peerj-06-5144-s003.xlsx]

## Sheet: 工作表1
RI wavenumbers	Gallus gallus domesticus		RII Wavenumbers	Gallus gallus dometicus	Macroolithus yaotunensis from Hongcheng Basin, Jiangxi, China	Macroolithus yaotunensis from Liguanqiao Basin, Henan, China	Macroolithus yaotunensis from Nanxiong Basin, Guangdong, China	Triprismatoolithus stepheni from Sevenhills, Montana, USA	Sediment from Hongcheng Basin, Jiangxi, China	Sediment from Liguanqiao Basin, Henan, China	Sediment from Nanxiong Basin, Guangdong, China	Sediment from Sevenmile Hill outcrops, Montana, USA	Crocodylia porosus	Tomistoma schlegelii
95.9547	9278		296.731	17416	7271.58	7632.63	3242.95	14595.7	13691	1230.29	2709.61	223.526	12601.6	19309.1
98.9038	8930		299.195	16849	7198.95	7519	3183.16	14379	13690.2	1210.49	2703.39	196.895	12202.2	19218.8
101.852	9096		301.658	16912	7196.26	7516.95	3212.26	14349	13602.4	1189.44	2673.56	181.684	11884	19027.7
104.799	9430		304.122	16912	7196.26	7516.95	3212.26	14349	13654.2	1187.39	2702.72	181.684	11827.6	19120.6
107.745	9864		306.585	17116	7281.79	7562.9	3242.84	14524.5	13671.4	1175.36	2732.84	175.579	11644.6	19172.9
110.691	9903		309.049	17052	7289.95	7535.05	3214.53	14434	13625.3	1161.5	2737.97	168.316	11501.7	19111.4
113.635	9587		311.512	16980	7296.58	7595.32	3235.79	14483.2	13723.9	1160.1	2776.42	167.263	11561.1	19261.5
116.578	9192		313.976	17190	7335.21	7609.42	3254.37	14505.6	13889.2	1158.76	2799.15	165.211	11600.9	19451.2
119.521	8983		316.44	16981	7372.63	7613.47	3271.68	14489.9	13953.2	1158.39	2789.25	162	11548.2	19451.5
122.462	8788		318.903	16981	7372.63	7613.47	3271.68	14489.9	13925.3	1162.44	2811.11	162	11549.2	19497
125.402	8499		321.367	17054	7456.63	7700.26	3280.95	14669.8	13934.7	1162.44	2814.85	159.947	11558.2	19535.2
128.342	8324		323.83	17124	7428.84	7725.63	3287.26	14650.6	13966.6	1166.03	2836.91	159	11577.2	19647.7
131.28	8110		326.294	17283	7466.89	7752.1	3289.68	14724.3	14013.8	1177.24	2868.7	163.421	11581.4	19684.6
134.218	7788		328.757	17554	7516.11	7828.42	3345.79	14908.2	14154.1	1178.8	2853.51	161.105	11703.1	19857.1
137.154	7538		331.221	17649	7543.21	7855.79	3342.37	14898.7	14254.7	1201.87	2902.39	161.105	11771.9	20113.4
140.09	7739		333.684	17649	7543.21	7855.79	3342.37	14898.7	14324.1	1196.56	2938.44	161.105	11787.2	20229.7
143.025	7559		336.148	17552	7530.74	7899.05	3331.89	14967.4	14311.3	1197.14	2934.81	163.263	11769.8	20207.5
145.958	7284		338.612	17507	7437.26	7795.84	3294.26	14808.5	14181.2	1202.89	2900.46	164.211	11593.8	19986.8
148.891	6968		341.075	17910	7622	7945.84	3379.05	15162	14161.7	1201.4	2935.58	171.421	11597.4	20038.9
151.823	7004		343.539	17555	7415.84	7754.74	3277.74	14819.4	14334.7	1203.1	2988.48	177	11775.1	20270.7
154.753	7032		346.002	17555	7415.84	7754.74	3277.74	14819.4	14366.9	1202.24	3035.8	177	11753	20249.9
157.683	6738		348.466	18054	7533.79	7877.47	3337.68	15037.6	14263.5	1198.62	3014.14	196.737	11602.1	20159.6
160.612	6501		350.929	17589	7471.68	7812.84	3306.53	14961.5	14111.1	1199.68	2980.24	219.737	11543	20001.4
163.54	5988		353.393	17568	7364.26	7713.37	3271.74	14774.3	14099	1199.78	2977.56	242.842	11538.8	19988.8
166.467	5797		355.856	17519	7433.95	7796.32	3288.79	14915.2	14185.6	1192.73	3010.87	269.526	11632.1	20145.4
169.393	5728		358.32	17646	7441.58	7813.32	3312	14968.7	14040.7	1181.76	2971.02	281.263	11479.9	19865
172.318	5409		360.784	17646	7441.58	7813.32	3312	14968.7	14044.4	1179.71	2973.86	281.263	11506.9	19933
175.242	5274		363.247	17483	7391.9	7742.95	3254.26	14807.3	14093.2	1190.41	2954.78	267.947	11425.2	19943.7
178.165	5230		365.711	17368	7418.58	7710.47	3288	14806	13988.2	1208.42	2948.97	254.789	11413.1	19875.7
181.087	5136		368.174	17574	7445.21	7775.58	3291.37	14897	13892	1215.98	2955.09	248.632	11401.1	19801.5
184.008	5086		370.638	17616	7451.68	7777.37	3289.95	14869.6	13870.2	1217	2957.33	236.158	11395	19781.6
186.929	4924		373.101	17549	7355.21	7725.9	3257.74	14691.7	14078.2	1240.12	2971.59	216.211	11469.9	20040.7
189.848	4964		375.565	17549	7355.21	7725.9	3257.74	14691.7	14152.8	1239.27	2980.68	216.211	11489.8	20095.4
192.766	4836		378.028	17486	7343.16	7645.42	3254.16	14592	14199.5	1244.49	2999.45	195.947	11510	20149.2
195.683	4635		380.492	17508	7319.05	7638.74	3250.11	14601.3	14261.5	1265.69	3017.4	174.053	11569.2	20266.1
198.6	4527		382.956	17333	7115.26	7485.42	3183	14357.4	14317.9	1271.94	3023.97	162.316	11621.5	20358.4
201.515	4613		385.419	17312	7056.32	7584.05	3182.79	14459.7	14389.1	1289.62	3061.74	152.158	11712.4	20535.7
204.43	4661		387.883	17356	7032.1	7569.37	3161.95	14426	14424.4	1307.11	3093.22	146.632	11775	20655.1
207.343	4465		390.346	17356	7032.1	7569.37	3161.95	14426	14419.4	1317.34	3088.99	146.632	11710.1	20571.6
210.256	4320		392.81	17205	6925.79	7533.74	3138.79	14409.5	14432.5	1337.92	3103.72	139.421	11721.6	20552.3
213.167	4421		395.273	17184	7022.21	7590.63	3142.95	14549.2	14480.6	1366.97	3137.41	140.842	11810.9	20652.4
216.078	4391		397.737	16793	6906.84	7427.63	3062.53	14309.6	14534	1399.29	3144.77	136.842	11790.9	20695.1
218.988	4299		400.2	17058	6961.47	7448.74	3065.89	14361.5	14651.2	1429.8	3161.31	135.737	11844.9	20875.4
221.897	4074		402.664	16916	7022.79	7461.42	3079.42	14396.3	14802.6	1459.22	3206.67	134.737	11958	21123.9
224.804	4006		405.128	16916	7022.79	7461.42	3079.42	14396.3	14745.1	1447.18	3196.73	134.737	11943.2	21069.4
227.711	4120		407.591	16926	7076.05	7420.52	3092.32	14396.7	14625.7	1417.43	3172.92	134.053	11882.4	20949.7
230.617	4028		410.055	16699	7059.11	7378.95	3083.95	14346.8	14635	1403.01	3169.05	129.579	11831	20967.6
233.522	3980		412.518	17031	7227.26	7456.9	3134.47	14472.6	14621.9	1376.2	3172.18	135.368	11881.7	21007
236.426	3889		414.982	16994	7186.47	7444.42	3133.42	14390.4	14589	1339.49	3163	132.579	11876	20932.5
239.329	3920		417.445	16875	7219.11	7447.9	3158.42	14361.9	14536.7	1338.62	3152.9	137.474	11879.3	20929.4
242.231	4066		419.909	16875	7219.11	7447.9	3158.42	14361.9	14559.3	1301.89	3149.89	137.474	11759.8	20918.5
245.133	3915		422.372	17038	7261.68	7461.79	3147.16	14414.3	14549.3	1300.95	3151.5	132.632	11771.8	20923.7
248.033	3787		424.836	17043	7346	7527.26	3210.26	14563.3	14476.6	1294.07	3162.47	133.842	11853.6	20954.2
250.932	3798		427.3	17239	7341.84	7514.63	3203.53	14569.6	14477.4	1292.26	3157.75	133.947	11807	20896.2
253.83	3856		429.763	17417	7439.95	7621.21	3228.84	14723.5	14512.3	1286.92	3179.42	135.368	11816.4	21031
256.728	3919		432.227	17776	7506.58	7748.26	3286.79	15006.7	14635.1	1295.4	3227.42	138.632	11885.7	21195.5
259.624	3968		434.69	17776	7506.58	7748.26	3286.79	15006.7	14325.5	1264.3	3170.5	138.632	11602.3	20721.7
262.52	4008		437.154	18164	7565.47	7894.79	3305.32	15176.4	14781.5	1320.09	3285.57	140.368	12034	21404.6
265.414	4100		439.617	18693	7701.79	8082.9	3393.26	15493.5	14802.7	1322.67	3290.89	138.105	12054	21436.3
268.308	4169		442.081	18857	7781.74	8207.21	3422.79	15717.5	14425.2	1281.12	3216.91	142.105	11750	20941.3
271.201	4343		444.544	19046	7759.84	8214.79	3412.53	15700.6	14699.3	1304.59	3324.68	143.632	12043.4	21368.1
274.092	4574		447.008	19063	7849.95	8283.32	3468.74	15837.1	14722.9	1302.18	3380.55	146.737	11982.4	21331.9
276.983	4867		449.472	19063	7849.95	8283.32	3468.74	15837.1	14643.5	1306.45	3481.38	146.737	11916.1	21255.4
279.873	5083		451.935	18791	7819.63	8218.63	3417.32	15818.3	14859.1	1335.85	3778.48	143.263	12101.7	21555.2
282.762	5110		454.399	19109	7831.9	8216.84	3435.32	15753.6	14769.8	1338.93	4118.76	144.526	12042.6	21543.3
285.65	4693		456.862	19353	7959.63	8344.79	3466.16	15989.6	14836.2	1353.72	4369.15	148.053	12105.7	21631.5
288.537	4416		459.326	19040	7847.16	8284.74	3450.32	15844.4	14877.1	1359.56	4429.56	146.579	12141	21674
291.423	4123		461.789	19533	7905.9	8313.53	3476.68	15949.7	14957.8	1351.78	4443.9	148.053	12173.4	21806.5
294.308	3883		464.253	19533	7905.9	8313.53	3476.68	15949.7	14907.5	1349.7	4336.72	148.053	12168.2	21787.9
297.192	3516		466.716	19739	8003.74	8448.16	3498	16144.8	14907.5	1359.36	4171.45	148.632	12166.8	21794.8
300.075	3329		469.18	19409	7831.68	8273.63	3420.74	15843.3	15018	1351.27	3968.8	141.053	12270.6	21943.9
302.958	3204		471.644	19563	7986.53	8402.16	3490.42	16104.9	15066.9	1336.28	3784.23	147.526	12316	22047.6
305.839	3169		474.107	19377	7858.37	8326.68	3429.63	15965.3	14999.1	1329.55	3647.26	142.947	12253.2	22013.7
308.719	3094		476.571	19500	7904.58	8392.84	3459.79	16080.4	14945.9	1327.67	3589	143.211	12213.5	21970
311.599	3042		479.034	19500	7904.58	8392.84	3459.79	16080.4	15025.1	1334.41	3576.05	143.211	12276.6	22079.9
314.477	2980		481.498	19647	7924.1	8366.74	3484.84	16091.4	15070.5	1342.37	3538.86	146.316	12329.6	22139.2
317.355	2950		483.961	19599	7858.74	8334.58	3433.16	16026.7	15006.8	1343.67	3471.17	146.105	12268.5	22026.5
320.232	2855		486.425	19756	7843.47	8332.21	3421.68	15965.5	14980.4	1346.93	3415.38	142.632	12209.4	21988
323.107	2866		488.888	19733	7900.32	8364.21	3441.11	16103	14923.4	1346.61	3392.87	144.263	12174.7	21967.3
325.982	2835		491.352	19702	7864.21	8296.1	3432.05	15975.2	14900.1	1340.58	3375.96	144.211	12164.4	21973.4
328.856	2816		493.815	19669	7862.79	8347.84	3428.26	16077.4	15023.9	1343.33	3400.89	145.263	12254	22147.7
331.729	2770		496.279	19669	7862.79	8347.84	3428.26	16077.4	14957.7	1342.26	3389.2	145.263	12203.4	22053.1
334.601	2810		498.743	19545	7870.53	8298.79	3429.68	16027.8	14841.9	1339.2	3367.89	144.368	12116.6	21887.4
337.472	2786		501.206	19662	7901.58	8337.21	3434.47	16077.5	14974	1343.52	3395.3	145	12224.8	22085.1
340.342	2792		503.67	19669	7811.32	8272.63	3412.79	15946.3	14984.7	1360.04	3414.86	147.053	12244.7	22138.2
343.211	2800		506.133	19700	7883.16	8358.21	3436.21	16056.7	14926.3	1354.13	3397.9	146.579	12200.8	22073.2
346.08	2751		508.597	19751	7850.79	8329.42	3427.26	16042.8	14921.9	1353.53	3419.6	148.842	12130.7	22039
348.947	2801		511.06	19751	7850.79	8329.42	3427.26	16042.8	14873	1344.76	3384.32	148.842	12130.9	22038.8
351.813	2900		513.524	19475	7798.47	8209.58	3412.53	15796	15036	1348.44	3383.44	150.105	12183.8	22272.5
354.679	2934		515.987	19686	7855.95	8343.63	3417.32	16059.8	15022.1	1348.61	3382.45	152.526	12182	22257.4
357.543	2914		518.451	19868	7982.42	8429.58	3488	16228.3	14840.3	1350.9	3368.32	160.684	12156.8	22059.6
360.407	2866		520.915	19442	7790.95	8256.21	3382.21	15865.2	14869.5	1353.45	3347.21	174.526	12111.6	22108.1
363.269	2914		523.378	20082	7975.05	8445.53	3467.74	16200	15180.5	1347.08	3414.6	196.368	12274.9	22473.5
366.131	2931		525.842	20082	7975.05	8445.53	3467.74	16200	15008.3	1352.87	3379.37	196.368	12227.1	22306.5
368.992	2854		528.305	19944	7903.37	8376.74	3436.32	16070.5	15181.2	1353.84	3402.76	217.421	12225.2	22369.8
371.852	2813		530.769	19792	7845.26	8348.1	3435.05	15997.9	14939.6	1339.11	3374.49	226.789	12177.1	22278.9
374.711	2654		533.232	20252	8017.9	8494.63	3510.53	16312.9	14912.9	1337.56	3371.33	232.684	12172	22268.8
377.569	2613		535.696	20176	7932.53	8421.16	3457.9	16102.2	15121.4	1354.17	3410.13	225.526	12281.6	22517.7
380.426	2717		538.159	20152	7983.47	8473.37	3488.32	16296.7	15174.9	1370.81	3368.71	218.842	12346	22589.9
383.282	2699		540.623	20133	7982	8443.16	3471.16	16167.4	15233.2	1370.6	3402.17	205.105	12437.3	22673.4
386.137	2706		543.087	20133	7982	8443.16	3471.16	16167.4	15340.5	1368.76	3428.64	205.105	12475.6	22812
388.992	2738		545.55	20290	7970.79	8444.74	3444.47	16198.8	15344.8	1375.18	3435.85	199.421	12491.3	22901.5
391.845	2756		548.014	20538	8062.11	8578.9	3509.32	16444.9	15248.4	1372.26	3411.96	186.316	12355.4	22730.5
394.697	2748		550.477	20438	8031.84	8543.84	3506.53	16344.3	15301.3	1377.48	3411	170.737	12399.7	22807.3
397.549	2944		552.941	20620	8021.21	8507.95	3475.47	16333.5	15342.3	1380.89	3415.22	164.789	12446.5	22878.6
400.4	2936		555.404	20697	8019.79	8561.68	3499.47	16380.2	15316.2	1384.87	3397.98	155.211	12444.6	22889.2
403.249	2890		557.868	20697	8019.79	8561.68	3499.47	16380.2	15277.8	1379.75	3413.27	155.211	12409	22878.9
406.098	3050		560.331	20508	7977	8495.48	3470.16	16341	15317.5	1382.86	3454.66	155.526	12436.1	22927.6
408.946	3059		562.795	20471	7991.63	8475.21	3474	16377.7	15277.9	1375.8	3424.9	153.895	12479.2	22908.6
411.793	3009		565.259	20680	8049.47	8523.9	3505.58	16442.3	15377.1	1384.45	3435.8	156.105	12567.8	23104.6
414.639	3051		567.722	20682	8075.31	8568.47	3520.58	16486.2	15307.8	1396.68	3422.47	157.789	12494.3	23063.2
417.484	3083		570.186	20422	7954.63	8447.21	3444.26	16240.8	15209.5	1403.09	3399.97	161.105	12443.2	22947.2
420.328	3114		572.649	20569	7936.26	8448.74	3442.1	16280.6	15366.7	1417.78	3447.33	174.684	12567.8	23144
423.171	3090		575.113	20569	7936.26	8448.74	3442.1	16280.6	15324.3	1404.75	3435.8	174.684	12437.5	23044.8
426.014	3103		577.576	20822	7970.32	8559.63	3470.32	16424.7	15219.6	1390.5	3402.82	176.053	12318.9	22911.5
428.855	3187		580.04	20765	8001.79	8503.9	3480.05	16346.4	15192.7	1401.19	3388.09	178.684	12454.5	22975.3
431.695	3119		582.503	20784	8001.95	8471.84	3467.16	16319.1	15237.7	1408.68	3397.22	179.947	12452.4	22995.2
434.535	3068		584.967	20511	7879.74	8376.63	3435.05	16212	15161.8	1414.07	3367.81	175.737	12344.5	22870
437.374	2974		587.431	21001	7971.16	8520.74	3459.16	16373	15138.6	1416.71	3359.6	172.842	12258.5	22863.3
440.211	2941		589.894	20608	7916.84	8398.32	3429.42	16216	15104.7	1416.36	3363.67	166.053	12240	22802.2
443.048	2981		592.358	20608	7916.84	8398.32	3429.42	16216	15140.8	1416.78	3381.89	166.053	12265.2	22812.1
445.884	2865		594.821	20710	7904.32	8439.26	3445.16	16262.5	15139.9	1423.6	3377.83	157.684	12282.1	22831.4
448.719	2868		597.285	20728	7871.58	8463.53	3432.63	16269	15120.5	1455.7	3360.33	152.105	12338.2	22898.2
451.553	2808		599.748	20778	7856.42	8360.79	3404.21	16115	15058.2	1467.85	3360.07	141.579	12248.2	22813.8
454.386	2816		602.212	20669	7845.05	8325.63	3393.74	16059	15193	1473.44	3346.91	143.895	12289.2	22902.6
457.218	2809		604.675	20924	7948.05	8486.69	3458.68	16295.8	15152.2	1478.37	3349.8	144.158	12339.9	22943.3
460.049	2706		607.139	20924	7948.05	8486.69	3458.68	16295.8	15150.5	1467.4	3335.47	144.158	12274	22895.8
462.88	2698		609.603	20854	7864.26	8402	3406.16	16179.9	15160.2	1460.17	3347.46	138.789	12278.8	22948.2
465.709	2678		612.066	21073	7909.47	8449.47	3424.95	16219.3	15224.1	1474.11	3359.02	142.526	12279.7	23030.3
468.538	2648		614.53	20969	7928	8457.47	3429.37	16309.5	15224.7	1474.22	3359.11	139.263	12279.8	23031
471.365	2604		616.993	21030	7955.79	8464.48	3426.68	16261.3	15215.9	1465.48	3340.49	140.474	12312.3	23048.1
474.192	2586		619.457	21197	7991.53	8537.42	3498.37	16355.6	15218	1468.12	3355.69	139.737	12382	23124
477.018	2637		621.92	21230	7924.42	8492.74	3438.89	16238.7	15058	1448.96	3316.7	141.263	12302.6	22930
479.843	2744		624.384	21230	7924.42	8492.74	3438.89	16238.7	15358.2	1512.53	3377.99	141.263	12506.3	23389.1
482.667	3097		626.847	21493	7995.53	8517.26	3453.53	16361.5	15387.8	1507.1	3375.95	141.105	12478.9	23406.4
485.49	3968		629.311	21378	7955.84	8538.68	3446	16319.5	15502.8	1495.48	3395.2	142.053	12570.6	23534.3
488.312	4609		631.775	21363	8035.63	8545.84	3477.58	16396.3	15455	1518.62	3372.43	141.632	12632.7	23548.5
491.133	4281		634.238	22011	8172.95	8694.9	3537.32	16643.9	15431.8	1526.11	3364	141.105	12643.2	23542.1
493.953	3413		636.702	21781	8057.79	8663.47	3497.53	16536.3	15423.4	1511.72	3388.09	137.737	12554	23526.9
496.773	2735		639.165	21712	8073.84	8658.79	3501.26	16562.9	15484.6	1540.98	3402.63	143.263	12617	23703.4
499.591	2583		641.629	21712	8073.84	8658.79	3501.26	16562.9	15579.5	1547.06	3390.95	143.263	12639.5	23726.2
502.409	2573		644.092	22172	8186.47	8714.37	3557.84	16637.2	15704.3	1550.64	3404.78	139.684	12695.8	23887.5
505.226	2573		646.556	22104	8112.26	8699.42	3517.16	16643.4	15677.1	1556.94	3411.63	146.789	12712.3	23952.3
508.041	2530		649.019	22086	8135.1	8713.05	3511.63	16693.2	15653.6	1556.11	3413.62	138.474	12740.5	23936.4
510.856	2504		651.483	22187	8127.89	8733.05	3526.42	16686.3	15654.7	1554.34	3413.09	140.421	12707.6	23950.9
513.67	2485		653.947	22348	8143.79	8702.63	3497.16	16762.7	15610.5	1535.69	3414.09	138.737	12667.7	23959
516.483	2470		656.41	22346	8110.53	8671.95	3531.26	16697.6	15585.1	1519	3418.44	139.579	12679.8	23963.8
519.295	2526		658.874	22346	8110.53	8671.95	3531.26	16697.6	15603	1518.64	3399.01	139.579	12659.2	23947.3
522.107	2456		661.337	22368	8156.63	8702.52	3522.21	16766.7	15602.4	1513.64	3379.9	141.895	12665.9	23899.6
524.917	2427		663.801	22675	8194.42	8762.32	3538.26	16880.6	15546.3	1501.61	3381.24	144.368	12690.2	23856.6
527.726	2432		666.264	22096	7964.63	8548.63	3447.11	16486.3	15571.7	1493.25	3388.26	141	12718.1	23960.1
530.535	2406		668.728	22936	8204	8786.68	3557	16922.9	15498.7	1463.69	3365.43	143.368	12635.9	23871.8
533.342	2426		671.191	22295	7969.11	8581.37	3436.58	16509	15346.5	1433.23	3322.18	140.211	12502.1	23671.1
536.149	2482		673.655	22990	8143.84	8720.16	3538.21	16822.8	15637.2	1469.62	3376.25	138.421	12753	24137.2
538.955	2485		676.118	22620	8049.79	8657.32	3499.74	16642.4	15472	1437.67	3360.78	143.684	12588.5	23855.6
541.76	2521		678.582	22620	8049.79	8657.32	3499.74	16642.4	15427.6	1433.91	3343.79	143.684	12561.3	23795.9
544.564	2503		681.046	22546	7997.32	8578.95	3444.42	16498.7	15308.7	1420.21	3296.66	138.632	12507.2	23660.2
547.367	2457		683.509	22891	8064	8655	3492.89	16726.7	15377.1	1408.72	3313.78	141.842	12594.2	23800.6
550.169	2451		685.973	22606	7994.79	8572.16	3456.58	16531.8	15408.7	1396.8	3312.11	138.895	12515.6	23692.2
552.97	2443		688.436	22741	8005.84	8606.37	3460	16542	15443.8	1414.81	3332.63	138.632	12566.6	23831.6
555.771	2471		690.9	23070	8056.68	8638.68	3474.74	16650.9	15193.8	1385.7	3283.61	138.211	12538.3	23612.5
558.57	2460		693.363	22819	7993.1	8567.21	3461.89	16514.3	15467.5	1416.75	3284.65	139.316	12719.1	23935.8
561.369	2539		695.827	22819	7993.1	8567.21	3461.89	16514.3	15375.8	1416.44	3302.01	139.316	12801.2	23882.7
564.166	2530		698.29	23182	7999.74	8589.84	3447.63	16477	15435.4	1393.67	3292	138.526	13009	24023.4
566.963	2532		700.754	23252	8074.26	8687.16	3504.32	16653.6	15435.4	1393.67	3292	138.263	13009	24023.4
569.759	2553		703.218	23689	8050.84	8687.53	3501.58	16619.7	15438.5	1400.23	3251.22	137.842	13566.7	24088.7
572.554	2597		705.681	23587	8059.11	8625.1	3485	16599.3	15540.4	1393.55	3293.36	134.263	14615.4	24408.6
575.348	2540		708.145	23986	8140.68	8733.26	3533.89	16739.4	15389.5	1376.37	3227.63	139.789	15433	24278
578.141	2593		710.608	23833	8066.37	8717.37	3491.63	16733.9	15628.6	1406.15	3272.16	140.053	15774	24764.7
580.933	2570		713.072	23833	8066.37	8717.37	3491.63	16733.9	15538.2	1378.77	3277.06	140.053	15037	24519.6
583.725	2568		715.535	23932	8087.95	8706.58	3488.42	16634.1	15578.3	1400.3	3271.06	139.316	14386.7	24536.8
586.515	2552		717.999	23877	8112.32	8713.1	3535.58	16714.3	15635.6	1381.17	3287.81	142.158	13844.7	24505.9
589.305	2543		720.462	23910	8103.11	8654.37	3489.21	16677.3	15649.8	1377	3273.2	142.105	13411.3	24444.2
592.094	2517		722.926	24426	8186.95	8808.31	3498.26	16894.2	15650.7	1377.56	3267.67	140.737	13316.2	24429.4
594.881	2536		725.39	24287	8067.89	8701	3485.74	16673.6	15754.7	1395.54	3286.61	140.579	13210.9	24659.9
597.668	2496		727.853	24358	8201	8801.58	3516.11	16838.8	15601.4	1390.34	3239.82	140.737	12961.6	24466
600.454	2485		730.317	24611	8209	8826.95	3541.05	16939.1	15723.3	1388.28	3237.07	141.158	12923.9	24576.6
603.239	2515		732.78	24611	8209	8826.95	3541.05	16939.1	15818.1	1388.73	3257.64	141.158	12949.4	24709.8
606.024	2492		735.244	24652	8121.21	8804.74	3522.05	16866.6	15704.8	1367.17	3239.14	139.579	12894.1	24638.9
608.807	2524		737.707	24546	8121.47	8807.84	3502.26	16916.1	15681.5	1357.78	3227.93	141.684	12781.7	24556.3
611.589	2446		740.171	24548	8080.53	8733.79	3487	16763	15824.7	1368.72	3255.1	143.421	12858.8	24753.6
614.371	2449		742.634	24671	8161.79	8796.05	3526.21	16997.7	15779.2	1363.49	3245.25	140.842	12845.9	24714.6
617.151	2530		745.098	24681	8092.16	8746.9	3476.58	16789.6	15613.1	1356.87	3217.62	138.526	12734.4	24479.7
619.931	2565		747.562	24781	8061.89	8734.58	3463.21	16800.2	15568.1	1360.89	3216.44	141.368	12731.8	24440.9
622.71	2610		750.025	24781	8061.89	8734.58	3463.21	16800.2	15621	1365.95	3209.07	141.368	12719.3	24497.9
625.488	2431		752.489	25011	8153.63	8808.84	3514.26	16975.3	15606.6	1369.24	3187.05	142.947	12696.7	24500.8
628.265	2344		754.952	24677	8073.32	8699.26	3488.42	16791.3	15524.2	1363.73	3172.51	135.737	12682.3	24411.5
631.041	2375		757.416	24642	8009.42	8699.53	3467.11	16747.2	15653.6	1362.69	3184.08	138.737	12741.7	24543.3
633.816	2372		759.879	24809	7991.21	8607.95	3434.37	16599.6	15663.4	1351.98	3170.66	138.368	12734.7	24553.5
636.591	2368		762.343	25108	8019.9	8684.16	3462.74	16751.3	15397	1331.72	3116.57	143.789	12534.8	24213.5
639.364	2396		764.806	24914	8039.47	8642.68	3447.53	16696.5	15356	1339.19	3105.94	139	12612.7	24287.6
642.137	2512		767.27	25110	7961.68	8643.1	3441.26	16632.2	15282.9	1334.64	3092.67	136.895	12473.1	24087.3
644.909	2606		769.734	25110	7961.68	8643.1	3441.26	16632.2	15349.3	1336.89	3048.78	136.895	12422.2	24113.1
647.68	2572		772.197	25312	8027.63	8700.32	3440.58	16705	15370.5	1342.49	3056.92	141.474	12447	24156.8
650.449	2443		774.661	25237	8002.53	8642.26	3452.79	16693.6	15429.1	1360.3	3077.32	145.211	12514.2	24274.2
653.219	2347		777.124	24994	7890.95	8536.32	3399.53	16484.6	15282.1	1333.47	3014.69	137.526	12343.9	23965.1
655.987	2343		779.588	25459	7939.16	8628	3432.26	16580.8	15307.3	1339.43	3043.21	140.737	12425.6	24103.7
658.754	2425		782.051	25301	7956.53	8603.05	3432.21	16584.3	15409.6	1350.72	3023.69	145	12526.5	24288.1
661.52	2420		784.515	25310	7944.95	8621.79	3434.95	16532.4	15269.8	1329.66	2997.34	147.421	12335.1	23996.6
664.286	2408		786.978	25545	8002.84	8642.69	3445.47	16561.4	15424.4	1336.95	3024.47	143.579	12524.6	24294.6
667.051	2425		789.442	25545	8002.84	8642.69	3445.47	16561.4	15176.1	1331.11	2970.44	143.579	12334	24006.9
669.814	2420		791.906	25543	7939.95	8594	3397.89	16493.8	15438.3	1329.17	2994.75	150.579	12485	24289.6
672.577	2498		794.369	26285	8141.68	8811.68	3496.89	16867.3	15404.7	1347.17	3028.4	149.526	12469.4	24352.9
675.339	2526		796.833	25445	7931	8623.48	3408.32	16542.9	15402.3	1348.22	3030.33	151.316	12468.2	24356.1
678.1	2402		799.296	26198	8084.26	8752.16	3497.16	16823.7	15525.4	1355.33	3024.01	151.053	12513.8	24408.4
680.86	2418		801.76	26228	8009.1	8736.21	3452.53	16672.6	15691.3	1369.92	3059.04	163.158	12707.1	24668.9
683.62	2509		804.223	26290	8067.26	8724.58	3478.11	16723.7	15419.5	1348.21	2974.44	159.842	12475.3	24316.7
686.378	2549		806.687	26648	8149.79	8840.32	3512	16922.5	15475.1	1343.18	3004.12	167.737	12532.8	24478.6
689.136	2508		809.15	26648	8149.79	8840.32	3512	16922.5	15694.3	1341.9	3013.48	167.737	12618.4	24748.8
691.892	2505		811.614	26757	8126.37	8790.1	3485.68	16854.8	15751.5	1371.68	3016.06	170.421	12731.9	24899.1
694.648	2535		814.078	26911	8176.89	8857.1	3518.84	16940.3	15660	1357.87	2989.53	179	12724.6	24747.6
697.403	2554		816.541	27038	8139.74	8869.52	3507.79	16920.2	15680.6	1339.81	2967.25	185.789	12754.4	24827.4
700.157	2571		819.005	27142	8151.84	8880.84	3490.53	17002	15719.8	1347.17	2969.09	201.211	12775	24852.2
702.91	2624		821.468	27488	8237.63	8956.63	3524.47	17128	15727.2	1352.78	2972.56	217.789	12775.5	24832.1
705.662	2730		823.932	27651	8251.74	8913.47	3538.05	17059.9	15739.7	1362.52	2969.15	238.053	12768.8	24873.6
708.414	2924		826.395	27658	8246.16	8979.95	3544.16	17181.6	15799.2	1368.86	2957.9	279.579	12810.4	24957.3
711.164	2986		828.859	27658	8246.16	8979.95	3544.16	17181.6	15889.6	1364.54	2965.26	279.579	12882	25096
713.914	3109		831.322	27883	8248.05	8960.1	3546.84	17177.9	15965.9	1369.83	2963.51	332	12930.5	25227.4
716.663	3053		833.786	27793	8241.16	8944.05	3542.95	17139.8	15880.1	1369.3	2928.07	426.368	12877.5	25166.2
719.41	2848		836.25	27932	8203.58	8941.79	3511.84	17162.2	15821	1359.73	2921.04	523.632	12829.4	25119.1
722.157	2702		838.713	28017	8216.11	8926.63	3546.32	17152	15877.8	1354.51	2935.96	589	12835.4	25163
724.904	2578		841.177	28188	8205.05	8970.9	3524	17165	15764.8	1346.47	2904.17	596.211	12747.9	24967.9
727.649	2512		843.64	28188	8224.95	8924.1	3538.63	17119.3	15715	1351.45	2879.84	563.579	12728.6	24881
730.393	2416		846.104	27932	8073.16	8812.31	3499.89	16954.4	15819.6	1359.66	2889.54	529.737	12828.7	25043.1
733.137	2450		848.567	28623	8270.63	8981	3546.42	17310.8	15733.6	1348	2870.67	529.526	12801.5	24938.3
735.879	2484		851.031	28623	8270.63	8981	3546.42	17310.8	15792.9	1346.15	2873.58	529.526	12812.9	25006.7
738.621	2531		853.494	28318	8161	8960.9	3500.84	17136.5	15863.9	1341.28	2868.89	507.211	12792.5	25071.1
741.362	2541		855.958	28480	8151.21	8928.11	3498.58	17176	15690	1335	2832.13	488.421	12655.8	24816.5
744.102	2558		858.421	28301	8147.1	8866.68	3497.68	17036.7	15670.7	1322.74	2812.31	429.79	12603.3	24784.9
746.841	2586		860.885	28251	8085.58	8869.1	3494.58	17035.1	15728.9	1327.78	2817.4	375.316	12600	24897.5
749.579	2601		863.349	28723	8152.05	8861.58	3498.1	17057.7	15664.9	1337.11	2792.61	326.579	12591.4	24780.7
752.316	2652		865.812	28456	8093.16	8846	3489.95	16992.6	15754.7	1339.77	2818.88	281.632	12741.2	25004.5
755.053	2733		868.276	28693	8180.53	8940.58	3503.37	17114.3	15739.8	1330.72	2771.06	245.947	12666.3	24869.1
757.789	2811		870.739	28693	8180.53	8940.58	3503.37	17114.3	15476.3	1313.57	2752.77	245.947	12593.1	24679.3
760.523	2777		873.203	28843	8124.95	8881.79	3495.42	17021.1	15696.9	1318.44	2744.56	213.263	12615.5	24869.2
763.257	2742		875.666	28622	8106.32	8840.05	3471.11	16992.6	15700.3	1318.98	2745.35	192.474	12618	24870.6
765.99	2661		878.13	28618	8147.26	8897.32	3476.21	17011.7	15805.2	1335.32	2769.54	174.684	12695.1	24912.3
768.722	2555		880.593	28903	8140.95	8887.16	3489.89	16991.6	15590.2	1332.19	2738.1	166.737	12585	24721.5
771.454	2486		883.057	29140	8139.32	8901.58	3496.26	17065.8	15824.3	1329.58	2737.76	162.789	12727.1	25040.5
774.184	2400		885.521	28982	8173.95	8906.68	3504.26	17057.3	15729.9	1330.37	2753.85	162.632	12743.1	25014.3
776.913	2344		887.984	29147	8147.11	8904.21	3501.37	17045.1	15628.5	1336.9	2702.61	160.895	12665.8	24873.5
779.642	2338		890.448	29478	8233.32	9018.79	3535.11	17250.4	15644.7	1345.94	2714.61	160.105	12672.7	24856.9
782.37	2344		892.911	29478	8233.32	9018.79	3535.11	17250.4	15748	1324.88	2721.17	160.105	12768.7	25050
785.097	2353		895.375	28775	8017.53	8767.26	3423.42	16778.4	15656.8	1324.07	2679.74	155.211	12675.9	24950.7
787.823	2351		897.838	29880	8322.37	9083.69	3554.58	17365.8	15786.2	1331.93	2691.1	156.105	12757.8	25076.7
790.548	2281		900.302	29527	8171.53	9000.95	3509.05	17152.8	15726.7	1328.69	2674.94	153	12730.6	25024.7
793.272	2315		902.765	29232	8146.21	8874.26	3490.47	17065.1	15693.3	1327	2667.78	154.158	12712	24993.6
795.996	2321		905.229	29691	8208.42	8998.37	3515.68	17169.3	15859.8	1342.55	2684.8	150.842	12845.1	25212.3
798.718	2340		907.693	29705	8201.21	9007.58	3522.53	17179.6	15763.6	1331.89	2670.75	146.053	12760.5	25103.3
801.44	2341		910.156	29940	8283.58	9068.58	3545.89	17342.1	15732.4	1335.9	2671.22	157	12707.5	25058.7
804.161	2385		912.62	29786	8184.84	8983.42	3511	17155.5	15780	1335.31	2670.85	149	12770.8	25137.1
806.881	2422		915.083	29786	8184.84	8983.42	3511	17155.5	15773.1	1333.48	2643.39	149	12799.8	25159.5
809.6	2467		917.547	30223	8324.11	9102.32	3585.84	17427.4	15862.1	1348.73	2633.99	157.421	12811.1	25247.7
812.318	2476		920.01	30161	8284.74	9057.37	3580.58	17373.9	15983.4	1350.1	2641.22	159.684	12827.3	25419.2
815.035	2529		922.474	30179	8280.63	9071.32	3565.68	17441.6	15765.4	1309.21	2620.4	167.789	12701.7	25136
817.752	2535		924.937	30216	8260.58	9060.1	3541.37	17340.5	15730.4	1310.16	2606.63	174.789	12706.6	25086.7
820.467	2611		927.401	30342	8289.21	9110.63	3569.21	17368	15984.2	1341.38	2619.55	174.842	12846	25415.2
823.182	2770		929.865	30114	8167.9	9023.1	3520.84	17238.4	15949.3	1327.67	2606.5	174.263	12840.1	25367.2
825.896	2797		932.328	30560	8359.16	9179.26	3611.89	17560.8	15866.2	1317.22	2581.89	179.368	12839.2	25321.1
828.609	2806		934.792	30455	8230.95	9058.79	3548.16	17364.2	15881.6	1319.27	2587.16	173.263	12841.7	25325.5
831.321	2961		937.255	30455	8230.95	9058.79	3548.16	17364.2	15912.8	1324.63	2590.25	173.263	12848.8	25342.9
834.033	2929		939.719	30552	8267	9083.21	3578.95	17394	15865.2	1326.59	2571.79	172.947	12792.4	25277.8
836.743	2891		942.182	30616	8232.9	9083.79	3569.37	17349.5	15821	1325.4	2556.16	173.474	12723	25194.8
839.453	2785		944.646	30743	8255.58	9112.26	3548.42	17359.7	16005.3	1333.84	2557.15	169.316	12883.2	25457
842.162	2882		947.109	30827	8336.47	9177.16	3590.58	17514.5	15905	1337.52	2559.44	165.579	12820.6	25414.5
844.869	2974		949.573	30524	8244.74	9011.79	3553.37	17250.8	15766.3	1323.66	2538.01	157.316	12685.9	25203
847.576	2972		952.037	30822	8313.68	9126.16	3581.05	17481.3	15825.3	1313.29	2506.58	155.842	12704.7	25204.6
850.283	3153		954.5	31057	8318.79	9174.9	3597.95	17499.4	15861.9	1315.63	2496.73	154.579	12771.6	25236.3
852.988	3231		956.964	30762	8255.58	9102.05	3547.68	17446.3	15801.6	1301.75	2516.75	137.947	12711.3	25149.8
855.692	3260		959.427	30762	8255.58	9102.05	3547.68	17446.3	15817	1316.01	2504.65	137.947	12719.8	25075.2
858.396	3128		961.891	30705	8247.69	9068.11	3573.26	17327.8	15988.2	1320.56	2508.89	145.474	12860.5	25390.6
861.099	3119		964.354	31216	8395.42	9239.16	3607.42	17564.1	15982.3	1320.24	2507.34	145.421	12856.3	25385.5
863.801	2970		966.818	30857	8284.63	9056.48	3584.68	17354	15820.4	1311.62	2465.21	131.474	12742.3	25246.9
866.502	2934		969.281	30547	8268.1	9102.84	3568.74	17370.9	15810.4	1306.11	2450.3	141.842	12745.9	25207.2
869.202	2940		971.745	30614	8327.37	9172.84	3594	17478.7	15755.6	1280.49	2459.42	141.421	12656.5	25065.3
871.901	2901		974.209	30865	8279.63	9120	3594.42	17358.3	15788.5	1290.12	2477.47	139.684	12772.5	25221
874.599	3032		976.672	30719	8302.11	9172.9	3597.42	17440.3	15913.8	1313.93	2444.89	140.211	12843.7	25292.6
877.297	3073		979.136	31422	8450.21	9312.68	3651.16	17714.3	15817.8	1306.31	2434.14	138.526	12672.9	25055.6
879.994	3139		981.599	31422	8450.21	9312.68	3651.16	17714.3	15864.3	1326.77	2409.72	138.526	12785.4	25302.5
882.69	3145		984.063	30560	8236.37	9108.63	3574.16	17405.5	15833.5	1305.73	2404.88	138.263	12736	25163.2
885.385	3103		986.526	30742	8366.32	9191.53	3645.32	17517.7	15933.9	1318.96	2432.13	137.737	12817.4	25311.1
888.079	3031		988.99	30616	8265.53	9162.21	3600.89	17426.9	15760	1325.29	2411.97	137.421	12762.3	25185.3
890.772	3096		991.453	30740	8341.9	9204.16	3636.79	17507.2	15825.3	1310.07	2394.12	136.105	12728.9	25107.1
893.465	3165		993.917	31320	8407.63	9305.26	3661.95	17663.8	15819.2	1309.1	2382.8	143.105	12762.3	25171.1
896.156	3226		996.381	30696	8301.53	9137.53	3622.11	17402.7	15796.4	1311.11	2379.44	137.684	12777.5	25201.4
898.847	3174		998.844	30581	8342	9253.37	3635.79	17518.2	15809.8	1304.56	2380.31	139.842	12782	25186.1
901.537	3181		1001.31	30882	8395	9272.1	3674.89	17666.6	15924.7	1301.83	2390.5	143.474	12804.1	25259.6
904.226	3168		1003.77	30480	8286.89	9160.53	3626.47	17429.3	15803.9	1289.35	2368.57	139.211	12720.1	25108.2
906.914	3204		1006.24	30480	8286.89	9160.53	3626.47	17429.3	15791.6	1290.25	2351.71	139.211	12679.3	25076.3
909.601	3156		1008.7	30783	8359.16	9276.26	3671	17619.4	15761.8	1297.96	2345.56	141.947	12658.5	24994.5
912.288	3155		1011.16	30432	8234.32	9135	3602.74	17407	15755.3	1301.91	2342.24	139	12752.1	25024.9
914.974	3086		1013.62	30552	8345.11	9231.53	3658.37	17497	15771	1300.2	2327.34	142.211	12823.2	25093
917.658	3196		1016.09	30602	8284.21	9242.95	3627.89	17528.3	15717.6	1300.15	2313.19	143.842	12715.7	24990.9
920.342	3250		1018.55	30762	8340.47	9247.32	3645.95	17575.8	15752	1299.03	2311.13	143.895	12651.1	24998.2
923.025	3391		1021.02	30665	8400.1	9293.68	3682.21	17693.5	15774.2	1294.46	2303.08	144.158	12700.9	25038
925.708	3559		1023.48	30014	8221.47	9093	3604.47	17308.9	15702.7	1298.71	2298.8	144.684	12673.1	24938.1
928.389	3651		1025.94	30159	8303.37	9216.47	3642.79	17463.4	15604.5	1293.51	2282.05	147.368	12567.6	24794.5
931.07	3826		1028.41	30347	8346.69	9269.47	3666.95	17589.5	15752.3	1299.56	2280.44	151.474	12715.2	25001.3
933.749	3902		1030.87	30347	8346.69	9269.47	3666.95	17589.5	15720.9	1294.91	2277.75	151.474	12669.5	24938.8
936.428	4222		1033.33	30493	8371.47	9266.1	3681.95	17626.2	15685.6	1282.66	2265.74	149.368	12584.6	24842.8
939.106	4382		1035.8	29971	8271.21	9165	3644.95	17440.2	15740.7	1281.64	2249.26	156.895	12651.1	24963.2
941.783	4652		1038.26	30076	8354.42	9233.05	3647.16	17496	15542.6	1286.56	2245.75	157	12583.5	24774.2
944.46	4979		1040.72	30141	8291.74	9236.21	3658.89	17546.3	15614.6	1294	2249.5	159.316	12508.5	24673.5
947.135	5128		1043.19	29881	8282.95	9229.16	3676.68	17488.2	15727.6	1307.15	2249.79	161.684	12587	24906.8
949.81	5201		1045.65	29931	8287.58	9250.26	3657.58	17508.2	15616.6	1291.37	2228.02	166.158	12553.7	24707.2
952.483	5405		1048.12	30137	8355.42	9295.58	3677.58	17646.6	15637	1309.59	2215.76	181.842	12609.4	24833.5
955.156	5606		1050.58	30217	8407.1	9348.68	3717.37	17727.4	15747.9	1291.59	2218.17	208.105	12602.3	24895
957.828	5627		1053.04	30155	8331.16	9288.74	3693.32	17546.1	15694.1	1285.93	2209.94	237.789	12644.7	24816.4
960.5	5764		1055.51	30102	8415.58	9343.37	3710.16	17724.7	15578.1	1287.06	2213.63	277.316	12639	24747.5
963.17	5683		1057.97	30102	8415.58	9343.37	3710.16	17724.7	15689.7	1291.92	2202.19	277.316	12759	24877
965.84	5280		1060.43	29941	8390.16	9347.95	3728.47	17715	15745	1306.57	2210.51	293.684	13028.4	24990.1
968.508	4964		1062.9	29901	8359.79	9239.26	3690.74	17532.1	15905.4	1324.25	2216.05	294.474	13255.7	25158.5
971.176	4980		1065.36	30082	8461.53	9404.84	3740.84	17758.2	15548	1278.09	2182.49	298.158	13204.7	24721.5
973.843	4699		1067.82	30075	8450.84	9424.42	3729.21	17761.7	15507.6	1272.89	2178.78	286.316	13197.2	24672.2
976.509	4368		1070.29	30590	8554.16	9495.74	3802.26	17916.4	15912.4	1319.24	2223.43	266.105	13886	25325.5
979.175	4079		1072.75	30546	8541.53	9437.1	3825.63	17793.2	15798	1314.84	2199.64	238.579	14615.5	25231.3
981.839	4020		1075.21	31142	8633.84	9455.79	3947.53	17832.3	15648.7	1290.91	2192.99	219.053	16147.9	25253.4
984.503	3918		1077.68	31713	8739.84	9671.74	4101.79	18011.4	16029.2	1330.11	2203.46	202.105	21738.6	26562.9
987.166	3736		1080.14	31713	8663.58	9648.05	4048.42	17931	15854.7	1317.86	2187.96	186.263	29503.2	28107.3
989.828	3672		1082.61	31713	8663.58	9648.05	4048.42	17931	15820.5	1286.66	2184.76	186.263	31716.8	29100.3
992.489	3655		1085.07	31713	8705.9	9779.9	3997.74	18179.4	15886.2	1301.69	2184.94	181.053	31716.8	28684.6
995.149	3801		1087.53	31713	8647	9740	3900.05	18187.5	15865.5	1309.38	2182.52	171	28296.5	27632.2
997.809	4048		1090	31606	8564.42	9546.74	3891.79	17996.8	15882.3	1301.54	2166.83	163.526	23203.5	26770.5
1000.47	4210		1092.46	31092	8615.68	9621.16	3859.58	18149.3	15813.8	1289.04	2170.47	166.737	18936.8	25998.1
1003.12	4600		1094.92	30734	8660.58	9632.37	3882.74	18174.2	15782.7	1286.1	2155.16	174.053	15799.7	25396.6
1005.78	4800		1097.39	29896	8557.84	9584.84	3836.05	18023.5	15986.6	1304.87	2163.22	168.053	14045.5	25374.7
1008.44	4461		1099.85	30124	8651	9671.42	3879.9	18177	15991	1308.38	2151.23	176	13246.5	25233.8
1011.09	4186		1102.31	29699	8652.84	9709.16	3871.32	18181.5	15936	1307.26	2135.65	179.789	12911.9	25109.7
1013.75	4235		1104.78	29544	8586.42	9585.42	3885.16	18041.3	16026.7	1316.44	2153.11	183.474	12884.5	25272.8
1016.4	3979		1107.24	29348	8599.05	9602.1	3873.37	18053.8	15996	1315.25	2143.1	195	12826	25167.5
1019.05	3742		1109.7	29568	8666	9684.42	3889.95	18200.9	15940.3	1309.05	2132.62	212.789	12710	25047.4
1021.71	3702		1112.17	29568	8666	9684.42	3889.95	18200.9	15880.3	1294.2	2128.06	212.789	12624.8	24982.3
1024.36	3759		1114.63	28975	8552.58	9566.21	3860.32	18069.9	15782.3	1286.23	2113.39	236.105	12546.5	24789.5
1027.01	3793		1117.1	29351	8642.74	9616.47	3901.05	18252.2	15748.1	1296.08	2107.82	272.421	12492.1	24775
1029.66	3799		1119.56	29047	8569.42	9599.37	3900.58	18071.8	15844.6	1301.31	2096.38	305.947	12516.5	24911
1032.31	3883		1122.02	29344	8685.89	9754.47	3928.47	18291.1	15880	1310.01	2104.4	328.526	12527.2	24920
1034.95	3835		1124.48	28824	8633.68	9591.26	3906.58	18095.2	15836.4	1295.45	2129.3	319.368	12486.6	24854.7
1037.6	3780		1126.95	28676	8630	9633.9	3910.89	18106.2	15919.6	1287.99	2106.15	330.316	12512.3	24891.2
1040.25	3628		1129.41	28945	8655.1	9663	3957.95	18152.8	15760.3	1279.92	2079.1	332.053	12435.9	24730
1042.89	3683		1131.88	28656	8658.79	9682.89	3901.95	18106.9	15764.2	1280.74	2072.8	354.895	12399.4	24797.4
1045.54	3735		1134.34	28751	8714.16	9737.37	3967.9	18254.7	15847.5	1290.03	2089.29	389.105	12403.2	24786.9
1048.18	3694		1136.8	28939	8772.37	9816.63	4008	18369.7	15897.5	1308.53	2078.33	414.421	12454.5	24866.2
1050.82	3735		1139.27	28939	8772.37	9816.63	4008	18369.7	15633.6	1301.38	2058.4	414.421	12322.4	24553.7
1053.46	3784		1141.73	28006	8557.37	9559.26	3918.63	17914.6	15888.1	1301.56	2061.85	417.263	12453.7	24900.6
1056.11	3881		1144.19	28435	8758.37	9791.05	4014.84	18310.2	15684.5	1261.12	2056.51	418.421	12172.5	24511.9
1058.75	3961		1146.66	28544	8814.89	9795.26	4026.63	18330.4	15863.7	1308.2	2080.49	383.632	12462.7	24764.8
1061.38	4315		1149.12	28613	8746	9811.58	4032.05	18264.2	15865.9	1308.78	2080.78	343.684	12466.2	24767.9
1064.02	4742		1151.58	28400	8797.74	9854.47	4048.53	18299.7	15863.4	1276.96	2074.66	291.368	12353.2	24734.1
1066.66	5017		1154.05	28396	8855.05	9907.21	4081.53	18368.1	15902.3	1299.92	2079.66	247.947	12479.9	24864.3
1069.3	5250		1156.51	28236	8741.74	9802.63	4039.79	18244.7	15803.4	1304.41	2073	211.263	12341.7	24629.8
1071.93	5781		1158.97	28538	8887.47	9996.21	4125.89	18537.4	15834.8	1295.03	2063.78	189.158	12406.3	24745.1
1074.57	6177		1161.44	28454	8943.42	9994.84	4151.16	18468.7	15834.7	1288.21	2046.7	173.632	12448.6	24792.9
1077.2	6933		1163.9	28098	8848.53	9877	4151.21	18405.6	15968.6	1291.08	2055.87	161.263	12407.2	24874.2
1079.84	8022		1166.37	27918	8840	9978.58	4135.32	18416.3	15746.8	1287.34	2047.69	159.158	12324	24599.7
1082.47	9558		1168.83	27918	8840	9978.58	4135.32	18416.3	15859.2	1289.5	2042.66	159.158	12366.1	24808
1085.1	11001		1171.29	28140	8965.21	9977.74	4196.74	18520.8	15860.3	1300.98	2042.27	153.579	12409.7	24896.3
1087.73	11596		1173.76	27955	8928.32	9988.95	4157.16	18510.6	15897.8	1297.36	2041.8	150.789	12463.9	24922.3
1090.36	10712		1176.22	28022	8953.37	10004.2	4216.11	18476.5	15859.3	1287.58	2043.16	148.632	12436.3	24807.5
1092.99	8852		1178.68	28442	9105.48	10136	4264.05	18739.3	15875.1	1297.89	2026.04	149.053	12336.2	24750.2
1095.62	6899		1181.15	28165	9020.26	10047.1	4265	18608	15773.6	1288.26	2021.19	145.789	12267.5	24575.4
1098.25	5482		1183.61	28139	9025.31	10144.8	4273.95	18631.8	15708	1286.24	2028.19	145.421	12268.3	24526.8
1100.88	4784		1186.07	27695	9010.05	10046.7	4271.53	18570.3	15812.8	1299.63	2015.58	142.105	12352.3	24690.1
1103.5	4426		1188.54	28126	9055.42	10143.8	4277.26	18647	15881	1304.66	2017.62	143.789	12331.8	24732.3
1106.13	4150		1191	28048	9114.16	10179.4	4338.63	18707.2	15803.5	1294.97	2025.55	147.263	12267.9	24623.4
1108.75	3836		1193.46	27669	9037	10138.8	4343.47	18636	15728.1	1285	2019.78	147.158	12278.5	24557.9
1111.38	3736		1195.93	27908	9197.84	10230.8	4406.68	18775.7	15777.8	1292.01	2013.35	145.842	12309.9	24608
1114	3682		1198.39	27519	9107.21	10211.1	4355.58	18692.8	15827	1301.56	2008.8	151	12329.1	24644.6
1116.62	3731		1200.86	27519	9107.21	10211.1	4355.58	18692.8	15851	1312.64	2013.87	151	12357.8	24661.4
1119.24	3686		1203.32	27938	9220.42	10316.2	4438.16	18870.7	15877.8	1311.59	2005.83	147.053	12371	24657.3
1121.86	3529		1205.78	27635	9182.26	10246.2	4436.26	18765.7	15819.5	1289.84	1998.58	141.632	12269.9	24544.6
1124.48	3513		1208.25	27594	9209.79	10285.6	4467.9	18758.8	15887.4	1317.27	2008.2	145.368	12373.5	24689.1
1127.1	3496		1210.71	27478	9227.68	10314.6	4496.79	18794.9	15880.6	1320.02	2002.39	154.263	12348.7	24672.3
1129.72	3567		1213.17	27533	9287.32	10356.9	4497.95	18865.9	15833	1302.64	2000.66	159.421	12328.6	24608.2
1132.34	3497		1215.64	27622	9397.32	10441.7	4590.1	18975	15799.2	1300.38	1985.27	166	12209	24503.3
1134.95	3296		1218.1	27200	9275.21	10343.2	4539.68	18738.2	15865.7	1319.97	1998.61	173	12267.1	24543.5
1137.57	3226		1220.56	27716	9412.58	10486.1	4601.68	18953	15862.8	1320.31	1997.15	207.737	12355	24593.8
1140.18	3078		1223.03	27014	9301.58	10362.8	4588.26	18798.5	15914.4	1306.26	2004.49	250.684	12302.1	24658.8
1142.8	3167		1225.49	27449	9458.1	10544.2	4684.37	19033	15888.8	1301.01	1992.05	307.842	12253.2	24507.4
1145.41	3147		1227.95	27182	9409.79	10497.2	4659.53	18962	15804.2	1311.08	1985.43	344.421	12202.1	24415
1148.02	3064		1230.42	27128	9454.26	10554.1	4700.63	18962.7	15719.2	1315.5	2005.99	364.684	12252.9	24435.7
1150.63	3146		1232.88	27128	9454.26	10554.1	4700.63	18962.7	15977.1	1329.74	2014.38	364.684	12434.4	24674.4
1153.24	3198		1235.35	27232	9472.74	10603.6	4722.74	19016.5	15805.3	1316.99	2000.33	365.579	12306.8	24473.7
1155.85	3143		1237.81	27010	9569.53	10655.6	4810.9	19090.2	15976.9	1337.26	2011.91	347.053	12387	24686.9
1158.46	3113		1240.27	26719	9407.32	10520.2	4739.37	18900.6	15865.7	1314.89	1987.56	300.789	12248.1	24552.7
1161.07	3194		1242.74	27107	9611.89	10680.5	4866.16	19119.6	15939.3	1333.95	2001.55	265.316	12412.4	24534.5
1163.68	3240		1245.2	26734	9553.05	10617.5	4823.9	18986	15947.4	1336	2003.11	229	12429.8	24533.6
1166.29	3195		1247.66	26914	9611.32	10741.3	4849.68	19202.8	15939.4	1327.27	1976.45	202.737	12375.7	24574.5
1168.89	3145		1250.13	26779	9626.79	10652.4	4896.63	19004.6	15783.6	1323.02	1967.3	186.053	12191.7	24316.2
1171.5	3303		1252.59	26605	9597.26	10685.2	4879.47	18988.8	15810.5	1329.1	1954.44	181.053	12239.3	24347.6
1174.1	3319		1255.05	26890	9744.79	10792.4	4988.31	19232	15877.3	1343.12	1971.24	186.105	12245.3	24485.5
1176.7	3202		1257.52	26592	9618.21	10728.2	4935	19023.5	15821.6	1332.82	1967.78	185.474	12215.7	24295.3
1179.31	3163		1259.98	26610	9703.74	10765.9	4991.42	19069.4	15875.1	1329.83	1979.67	196.474	12248.2	24377.2
1181.91	3265		1262.44	26504	9713.9	10829.2	4999.58	19191.2	15853.9	1328.26	1971.37	223.421	12234.4	24323.2
1184.51	3217		1264.91	26436	9719.21	10824.8	5029.95	19140.4	15837.3	1332.51	1963.13	264.579	12213.3	24240.3
1187.11	3243		1267.37	26343	9622.84	10828.6	4989.16	19047	15823.3	1337.4	1947.32	343.211	12248.6	24239.8
1189.71	3212		1269.84	26343	9622.84	10828.6	4989.16	19047	15786	1345.32	1944.32	343.211	12213.2	24241.3
1192.31	3177		1272.3	26512	9704.84	10873.3	5047.05	19085.8	15832.5	1349.86	1952.56	443.263	12178.6	24234.4
1194.9	3290		1274.76	26280	9753.89	10885.9	5057.53	19182	15826.8	1348.66	1962.67	539.053	12170.1	24249.5
1197.5	3387		1277.23	26298	9856.53	10986.2	5144.47	19297.6	15792.4	1364.21	1960.27	613.842	12206.3	24247.3
1200.1	3542		1279.69	25661	9633.58	10732	5026.16	18869.8	15713.1	1367.47	1947.12	621.211	12184.5	24100.7
1202.69	3561		1282.15	26408	9937.42	11038.1	5212.16	19371	15743.7	1357.14	1944.95	624.579	12150.1	24094.8
1205.29	3751		1284.62	25917	9858.74	10884.9	5185.63	19158.4	15789.4	1369.28	1945.09	554.895	12162.6	24181.8
1207.88	3829		1287.08	25738	9803.42	10860.1	5135	19047.6	15707.6	1380.72	1940.58	473.632	12085.8	24099.2
1210.47	3752		1289.54	26178	10091.9	11185.1	5287.58	19576	15759.2	1374.84	1939.63	415.421	12068.8	24107.9
1213.06	3831		1292.01	25866	9931.1	10971.6	5239.89	19220.4	15786.9	1371.89	1932.4	329.895	12126.6	24122.3
1215.66	3840		1294.47	25721	9920.05	10975.6	5231.26	19164.3	15850.2	1387.46	1934.22	282.632	12099.9	24106.7
1218.25	3903		1296.93	25905	10049.8	11131.4	5351.37	19382.6	15807.6	1397.15	1948.08	231.263	12092.8	24025.8
1220.84	3826		1299.4	25687	10047.1	11101.2	5347.79	19314.2	15684.2	1381.95	1940.35	205.105	11998.4	23913.7
1223.42	3866		1301.86	25861	10139.5	11194.7	5398.1	19412.8	15855	1398.17	1934.94	192.211	12082.3	24147.7
1226.01	3912		1304.33	25596	10074.6	11113.9	5403.84	19335.6	15770.8	1400.61	1922.43	175.895	12085.4	24056.8
1228.6	3993		1306.79	25596	10074.6	11113.9	5403.84	19335.6	15630.4	1395.22	1924.78	175.895	12010.5	23868.8
1231.19	4220		1309.25	25742	10091.4	11185.1	5445.68	19389.5	15684.5	1397.53	1927.47	167.105	12034.3	23924.7
1233.77	4346		1311.71	25982	10332.2	11446.9	5584.95	19721.3	15955.4	1408.65	1941.92	160.526	12162.3	24212.9
1236.36	4335		1314.18	25698	10164	11301.5	5514.58	19493.4	15900.5	1403.68	1944.47	151.474	12186.7	24191.5
1238.94	4451		1316.64	25851	10354.2	11451.6	5610.89	19672.6	15840.6	1403.61	1936.69	157.474	12091.5	24036
1241.52	4436		1319.11	25747	10326.5	11370.7	5624.05	19577.5	15840.6	1390.97	1960.02	149.316	12085.1	23984.7
1244.1	4444		1321.57	25860	10351.8	11440.2	5643.95	19646.8	15724	1383.15	1936.77	150.158	12088.6	23959.3
1246.69	4477		1324.03	25699	10304.3	11458.5	5671.53	19573.4	16022.1	1419.98	1967.55	144.211	12324.8	24371.7
1249.27	4534		1326.5	25561	10326.5	11380.2	5653.42	19456.2	15739.4	1382.87	1933.97	142.737	12041.2	23940
1251.85	4544		1328.96	25717	10402.4	11517.5	5732.53	19710.2	15649.9	1369.22	1931.01	145.684	11979.8	23772.7
1254.43	4501		1331.42	25794	10537.4	11613	5798.74	19799.9	15961.4	1398.19	1932.51	140.316	12191.2	24255.5
1257	4414		1333.89	25781	10509.4	11588.4	5787.79	19690.2	15816.5	1381.81	1911.12	142.053	12044.1	23972.4
1259.58	4384		1336.35	25689	10602.6	11723.7	5842.21	19888.4	15812.8	1377.43	1904.14	137.737	12069.5	23925
1262.16	4383		1338.82	25512	10529.9	11616.9	5808.74	19728.9	15925.9	1372.68	1931.04	139.263	12065.6	24107.4
1264.73	4379		1341.28	25528	10566.6	11676.9	5880.53	19844	15730.2	1344.22	1911.16	138.789	11866.8	23739.4
1267.31	4385		1343.74	25589	10555	11671.6	5861.1	19854	15834.9	1360.62	1919.88	142.158	12048.3	23932.9
1269.88	4285		1346.2	25589	10555	11671.6	5861.1	19854	15852	1363.85	1914.92	142.158	12049.4	23937.3
1272.46	4235		1348.67	25401	10668.7	11774.5	5930.37	19984.9	15807.3	1354.51	1926.9	145.21	12052.8	23935.3
1275.03	4216		1351.13	25288	10535	11672.6	5847.16	19776.5	15806.4	1359.56	1932.7	141.895	12047.5	23933.2
1277.6	4148		1353.6	25554	10668	11826.6	5927.68	20042.8	15886.7	1349.71	1946.7	154.158	12092.1	23999.6
1280.17	4280		1356.06	25140	10460.5	11650.8	5826.32	19712.3	15898.1	1357.68	1930	159.316	12049.3	23940
1282.74	4195		1358.52	25390	10622.2	11782.8	5921.26	19980.3	15769.7	1345.33	1910.49	162.684	11996.8	23832.4
1285.31	4061		1360.99	25019	10510.3	11730.5	5860.37	19945.4	15760.8	1329.8	1927.09	164.421	12008.9	23834.4
1287.88	3997		1363.45	25573	10610.5	11809.2	5903.79	20063.2	15758.5	1321.82	1929.16	161.684	11994.4	23773.5
1290.45	3976		1365.91	25097	10427.2	11669.1	5751.05	19829.2	15780.5	1327.49	1935.44	156.947	11984.4	23773.2
1293.01	4046		1368.38	25075	10483	11689.6	5804.37	19868.6	15778.7	1330.19	1922.31	156.632	11979.3	23759.6
1295.58	4210		1370.84	25076	10432.8	11662.1	5773.89	19873.6	15669.5	1317.41	1904.37	154.842	11906.7	23627.8
1298.15	4251		1373.3	25166	10427.7	11713.4	5759.37	20068.6	15655.7	1308.29	1915.58	149.211	11867.3	23613.9
1300.71	4226		1375.77	24693	10271	11473.4	5659.89	19743	15702.1	1303.18	1902.45	141.737	11871.4	23630.4
1303.27	4267		1378.23	24756	10328.5	11666.7	5660.74	20001.9	15596.3	1296.99	1874.68	146.947	11815.4	23466.3
1305.84	4239		1380.69	24683	10284.3	11578.5	5663.1	19903.4	15497.9	1297.13	1875.78	148.737	11796.6	23354.8
1308.4	4297		1383.16	24676	10268.6	11578.7	5590.74	19968	15592.2	1306.93	1910.09	154.263	11843.4	23503.9
1310.96	4411		1385.62	24606	10159.7	11471.1	5522.47	19826.4	15617.7	1304.78	1920.78	163.632	11881	23622
1313.52	4412		1388.09	24574	10123.7	11464.4	5470.95	19911.7	15535.8	1293.8	1910.36	184.158	11792.3	23459.7
1316.08	4344		1390.55	24574	10123.7	11464.4	5470.95	19911.7	15416.8	1276.83	1887.07	184.158	11653.7	23173.3
1318.64	4387		1393.01	24190	9977.89	11274.7	5359.05	19640	15614.2	1305.79	1888.88	196.316	11864.6	23467.1
1321.2	4439		1395.48	24423	9938	11339.7	5370.16	19704	15341.7	1282.34	1858.78	204.158	11629.4	23088.9
1323.76	4425		1397.94	24411	9997.47	11328.6	5363.11	19758.3	15489.6	1278.48	1876.85	195.053	11656.7	23250.4
1326.31	4529		1400.4	24148	9865.74	11293.1	5279.42	19717.2	15561	1304.82	1878.24	187.895	11724.3	23284.5
1328.87	4474		1402.87	23925	9805.47	11158.5	5219	19541.9	15471.3	1274.96	1868.22	171.158	11773.1	23178.7
1331.42	4417		1405.33	23958	9816.32	11174.9	5201.05	19645.5	15440	1280.85	1850.67	159.421	11589.3	23130.8
1333.98	4439		1407.79	23913	9745.32	11141	5148	19534.5	15381.2	1270.66	1880.83	153.474	11608.1	23036.4
1336.53	4549		1410.26	23960	9793.53	11191.1	5188.1	19686.3	15300.7	1271.12	1853.76	147.368	11589.3	22901.7
1339.08	4583		1412.72	23675	9645.68	11000.3	5083.32	19483.5	15563.5	1290.43	1856.99	148.368	11729.6	23166
1341.64	4604		1415.18	23621	9747.84	11152.5	5107.68	19670.3	15081.6	1250.33	1826.29	149.474	11327.7	22526.7
1344.19	4504		1417.65	23643	9767.37	11114.6	5121.42	19630.9	15348.6	1267.6	1870.18	144.579	11649.4	23019.2
1346.74	4397		1420.11	23603	9669.16	11141.3	5083.68	19670.2	15329.8	1272.74	1871.66	148.842	11578.2	22974.4
1349.29	4300		1422.58	23467	9623.32	11037.6	5040.74	19486.5	15411.5	1287.64	1851.98	150.158	11650.7	22974.7
1351.84	4136		1425.04	23347	9657.74	11088.6	5072.37	19632.5	15336.1	1270.95	1835.57	157.368	11681.9	22881.1
1354.38	4135		1427.5	23674	9711.37	11144.2	5063.05	19730.2	15275.5	1263.74	1846.03	159.053	11702.6	22825.1
1356.93	4015		1429.97	23746	9719	11190.7	5060.21	19814.4	15461	1289.61	1851.16	164.526	11882.9	23097.2
1359.48	3948		1432.43	23736	9706	11162.3	5065.47	19808	15311.8	1264.3	1831.51	179.632	11993	22909.3
1362.02	3868		1434.89	23522	9665.89	11131.2	5033.74	19766.6	15327.7	1259.17	1834.29	194.368	12021.1	22870.3
1364.57	3866		1437.36	23574	9680.53	11159.8	5046.16	19846	15445.2	1278.79	1853.04	217.053	12062	23081.9
1367.11	3801		1439.82	23574	9680.53	11159.8	5046.16	19846	15400.6	1264.2	1849.52	217.053	11828.9	22923.5
1369.65	3709		1442.28	23834	9757.79	11299.7	5069.58	20089	15389.9	1272.31	1848.38	228.789	11777.6	22895.1
1372.2	3612		1444.75	23625	9665.9	11184.1	5028.74	19935.1	15517.4	1289.47	1866.62	234	11691.4	23001
1374.74	3594		1447.21	24070	9814.53	11332.9	5095	20179	15499.8	1280.87	1855.42	240.263	11632.2	22961.4
1377.28	3512		1449.67	23925	9713.11	11273.7	5021.1	20055.7	15467.3	1273.48	1830.41	231.421	11585.7	22896.6
1379.82	3538		1452.14	23791	9742.42	11320.4	5042.37	20169	15423.2	1278.19	1837.08	228.053	11553.6	22873.2
1382.36	3579		1454.6	23829	9791.63	11313.4	5035.68	20158	15472.6	1283.04	1857.83	221	11641	22939
1384.9	3550		1457.07	23729	9666.47	11245.5	5003.11	20077.4	15554.3	1290.2	1870.47	222.421	11653.3	23002.3
1387.44	3632		1459.53	23759	9752.42	11284.1	5024.58	20158.5	15555.1	1290.45	1868.1	240.105	11599	23000.2
1389.97	3788		1461.99	23719	9767.21	11355.3	5034.42	20284.1	15452.5	1274.37	1847.49	275.895	11540.1	22893.6
1392.51	3809		1464.46	23514	9625.68	11243	4954.53	20134.6	15454.7	1276.7	1851.8	323.053	11538.2	22933.7
1395.04	3882		1466.92	23731	9713.53	11354.1	5008.95	20284.6	15549.9	1288.84	1868.4	386.789	11588.4	23029.3
1397.58	3823		1469.38	23411	9575.26	11230.7	4971.58	20054	15513.8	1280.16	1861.68	443.737	11549.1	22940.7
1400.11	3776		1471.85	23379	9556.47	11241	4952.32	20132.7	15582.5	1282.88	1860.27	493.526	11533.2	23002.4
1402.64	3954		1474.31	23298	9570.89	11265.7	4930.21	20205.7	15382	1277.17	1824.59	558.316	11362.2	22722.7
1405.18	3999		1476.77	23094	9550	11219.5	4933	20125.8	15408.5	1287.72	1831.33	604.789	11479.5	22861.2
1407.71	3952		1479.24	23065	9601.26	11282.7	4902.26	20197.7	15424.7	1286.68	1837.37	629.421	11439.8	22846.6
1410.24	4014		1481.7	23302	9577.58	11243.2	4907	20165	15541.5	1273.95	1834.16	641.053	11444.4	22928.4
1412.77	4161		1484.16	23028	9617.48	11196.1	4923.37	20105	15388.2	1261.75	1806.8	584.316	11344.7	22654.8
1415.3	4191		1486.63	22770	9492.79	11120.8	4872.95	20009.9	15457.6	1274.99	1838.42	486.842	11388.6	22776.5
1417.83	4333		1489.09	22866	9620.95	11224.9	4923.58	20181.3	15437	1287.11	1844.87	411.526	11442.4	22774
1420.35	4387		1491.56	22832	9573.58	11189.4	4913.26	20110.9	15231.1	1261.19	1837.67	329.579	11284	22474.4
1422.88	4591		1494.02	22692	9555.16	11186.5	4927.79	20106.3	15352.1	1273.72	1804.88	256.474	11320.9	22633.6
1425.41	4544		1496.48	22692	9555.16	11186.5	4927.79	20106.3	15419.9	1289.43	1816.89	256.474	11336.2	22701.7
1427.93	4553		1498.95	22891	9545.74	11239.1	4892.63	20152.3	15172.8	1255.11	1787.87	206.526	11189.2	22268.6
1430.46	4686		1501.41	22591	9605.16	11252.4	4934.58	20202.2	15321.5	1274.86	1807.08	176.105	11278.2	22549.8
1432.98	4787		1503.87	22782	9603.05	11258.9	4923.53	20220.1	15135.2	1269.79	1800.49	160.684	11222.1	22387.5
1435.5	4869		1506.34	22506	9467.68	11071.9	4841.32	19918.4	15114.1	1253.22	1819.84	141.579	11159.8	22249
1438.02	5058		1508.8	22655	9646.68	11268.8	4979.95	20278.8	15161.6	1256.74	1787.4	140.895	11222.2	22393.9
1440.55	5195		1511.26	22852	9614.42	11223.3	4962.1	20197.3	15043.7	1248.27	1797.07	137.316	11064	22147
1443.07	5272		1513.73	22508	9485.16	11125.3	4912.95	20071.8	15176.8	1260.6	1786.62	133.368	11127.2	22294.2
1445.59	5550		1516.19	22604	9665.58	11347.7	4949.26	20320.6	15206	1263.78	1795.4	136	11175	22365.5
1448.11	5415		1518.65	22608	9657.37	11313.8	4967.26	20260	15117.7	1253.01	1778.16	133.263	11126.2	22148
1450.62	5333		1521.12	22485	9600.21	11262.6	4938.1	20174.2	15090.4	1248.88	1785.42	128.105	11118.3	22102
1453.14	5334		1523.58	22311	9561.21	11205	4950.95	20099	14906.5	1234.26	1766.17	126.053	11003.8	21920.8
1455.66	5163		1526.05	22092	9570.68	11194.3	4905.84	20100.8	14953.8	1240.75	1767.79	125.579	10985	21945.1
1458.17	5009		1528.51	22548	9712.05	11402.7	5034.9	20399.6	14999.7	1251.58	1771.19	125.579	10957	22002.4
1460.69	4962		1530.97	21939	9562	11217.3	4939.47	20111.5	15029.6	1248.39	1785.65	125.368	11004.9	21995.9
1463.2	4805		1533.43	22074	9489.89	11123.2	4899.74	19964.4	14922.2	1246.02	1772.61	119	10935.1	21883.5
1465.72	4715		1535.9	22410	9700.26	11386	5050.74	20305.2	14904.9	1240.23	1776.71	122.895	10955.8	21923.1
1468.23	4551		1538.36	22094	9606.84	11290.1	5009.95	20101.9	14922.1	1229.04	1768.43	119.526	10937.7	21829.6
1470.74	4270		1540.83	22153	9653.47	11313.8	5025.9	20166.6	14877.1	1227.39	1739.56	120.684	10816.5	21691.3
1473.25	4060		1543.29	22201	9767.11	11406.4	5110.79	20415.2	14918.3	1233.26	1752.98	123.895	10882.3	21812.8
1475.76	3768		1545.75	22124	9596.32	11268.9	4972.05	20083.4	14927.2	1240.17	1760.91	120.526	10949	21845.2
1478.27	3457		1548.22	22074	9748.37	11414.1	5118.42	20323	14905.6	1242.47	1753.52	119.632	10907.9	21737.7
1480.78	3283		1550.68	21829	9741.63	11411.7	5116.16	20272.1	14993.9	1246.97	1774.32	118.684	10945.6	21820.4
1483.29	3158		1553.14	21895	9759.21	11447.1	5126.89	20312	15064.1	1254.78	1790.11	120.053	10991.8	21940.8
1485.8	3028		1555.61	21995	9803.68	11496.5	5177.16	20320.1	15041.4	1253.77	1781.93	120.105	10964.1	21910.2
1488.3	2991		1558.07	22170	9899	11582.3	5231.47	20520.3	14969.8	1247.43	1760.19	116.474	10907.7	21818.4
1490.81	2986		1560.53	22009	9917.42	11522.7	5288.79	20423.7	14950.6	1248.27	1755.69	118.842	10914.8	21794.5
1493.31	2958		1563	21871	9868.26	11537.3	5265.53	20358.7	15031.4	1267.34	1774.43	118.684	10955.8	21866
1495.82	2920		1565.46	21869	9959.53	11646.7	5315.11	20467.3	14977.9	1264.22	1770.34	115.263	10906.9	21761.7
1498.32	2935		1567.92	21794	9955.16	11599.7	5335.95	20363.2	14888.4	1253.82	1770.56	116.421	10877.9	21674.6
1500.82	2902		1570.39	21794	9955.16	11599.7	5335.95	20363.2	14947.6	1269.05	1752.69	116.421	10856.9	21698.1
1503.33	2869		1572.85	21890	10056.6	11756.7	5395.79	20581.8	14967.3	1255.31	1763.13	114.526	10919.9	21768.6
1505.83	2824		1575.32	21738	10048.9	11645.6	5455.05	20455	14941	1233.95	1762.65	116.421	10897.5	21710.1
1508.33	2867		1577.78	21633	10060.4	11680.8	5446.37	20416.9	15095.8	1253.8	1769.2	117.105	11009.9	21906.8
1510.83	2911		1580.24	21649	10170.5	11750.9	5503.63	20549.8	15045.7	1253.63	1775.53	112.053	10963.8	21852
1513.33	2934		1582.71	21746	10162.3	11788.5	5544.58	20572.6	15104.9	1246.68	1784.96	115.895	10965.3	21870.4
1515.82	2906		1585.17	21310	10082.4	11732.3	5529.58	20423.3	15109	1246.54	1782.06	117.053	10922.4	21853.8
1518.32	2897		1587.63	21852	10185.7	11859.2	5609.37	20602.1	15112.9	1259.26	1777.84	115	10985.6	21884.1
1520.82	2864		1590.1	21801	10289.3	11989.5	5686.9	20725.7	15109.1	1257.46	1773.58	116	11055.1	22010.9
1523.31	2880		1592.56	21321	10069.7	11769.1	5545.95	20400.9	15016.6	1271.18	1763.42	114.526	11003.5	21796.6
1525.81	2893		1595.02	21692	10312.2	12029.5	5705.9	20808.5	15102.5	1251.53	1784.2	117.053	11007.7	21864.3
1528.3	3026		1597.49	21362	10110.8	11736.2	5560.79	20386.2	15038.1	1258.27	1763.31	117.053	10939	21782.2
1530.8	3134		1599.95	21379	10177.6	11851.6	5619.63	20553.8	15042	1258.79	1758.46	114.632	10872	21786.6
1533.29	3270		1602.41	21499	10193.4	11906	5593.89	20649.8	15063.2	1268.45	1791.38	114.105	10940.9	21810
1535.78	3256		1604.88	21186	10158.8	11865.5	5566.05	20662.6	15018.3	1241.71	1762.54	118.263	10898.1	21696.7
1538.27	3189		1607.34	21448	10085.6	11840.2	5526.84	20659.7	15023	1244.96	1769.53	116.737	10941.6	21749.6
1540.76	3185		1609.81	21378	10024	11807.8	5462.11	20596.8	14882.5	1230.53	1754.71	112.053	10818.8	21551.2
1543.25	3225		1612.27	21037	9924.9	11684.3	5401.63	20459.9	14924.1	1238.43	1748.37	114.474	10817	21566.5
1545.74	3270		1614.73	21318	10029.4	11855.6	5429.47	20783.4	14954.1	1240.38	1745.77	117.316	10880.9	21633.6
1548.23	3407		1617.2	20689	9696.95	11485.3	5207.26	20244.5	14933.2	1242.64	1760.81	111.895	10885.8	21547.5
1550.72	3560		1619.66	21123	9849.47	11736.9	5268.05	20680.2	14943	1234.26	1744.73	112.737	10824.8	21530.4
1553.2	3663		1622.12	21103	9785.79	11650.2	5197.58	20602.5	14977.3	1245.81	1734.39	109.421	10779.8	21489.9
1555.69	3575		1624.59	21017	9716.63	11568.3	5135.79	20571.4	14915.8	1242.13	1744.4	114.789	10811.2	21459.8
1558.17	3454		1627.05	20811	9602.95	11500.7	5013.21	20511.6	14970.4	1242.07	1756.73	117.105	10811.6	21542.3
1560.66	3411		1629.51	20697	9515.37	11423.7	4954.74	20480.3	14938.7	1243.95	1746.65	109.105	10808.8	21524.8
1563.14	3422		1631.98	20944	9597.68	11537.5	4963.53	20726	14871	1238.63	1735.79	107.947	10793.7	21425.8
1565.63	3431		1634.44	20528	9402.05	11307.8	4798	20406.4	14801.7	1234.92	1732.77	115.947	10694.4	21317.7
1568.11	3419		1636.9	20560	9379.16	11273.5	4766.16	20462.6	14816.9	1243.97	1742.33	111.316	10689.2	21371.3
1570.59	3457		1639.37	20910	9395.05	11354.7	4781.89	20621.2	14866	1253.28	1747.29	113.842	10738.5	21421.3
1573.07	3524		1641.83	20559	9243.79	11234.9	4680.47	20404	14793.3	1244.33	1733.1	116.211	10680.4	21281.5
1575.55	3455		1644.3	20469	9253.32	11174.9	4644.95	20412.8	14777.2	1236.62	1728.16	111.947	10655	21204.5
1578.03	3317		1646.76	20438	9259.68	11239.4	4637.47	20559.1	14793.8	1233.38	1728.47	114.421	10671.3	21199
1580.51	3399		1649.22	20360	9198	11196.6	4577.79	20488.7	14807	1227.06	1726.38	113.316	10707.8	21245.8
1582.98	3471		1651.69	20233	9132.05	11132.8	4540.74	20392.8	14793.3	1234.96	1722.56	112.632	10783.4	21236.4
1585.46	3410		1654.15	20194	9119.68	11038.3	4493.95	20369.4	14730	1231.6	1720.4	117.211	10729.9	21143.4
1587.94	3319		1656.61	20253	9126.84	11127.3	4496.32	20447.6	14677.4	1216.05	1715.93	114.947	10670.4	21048.3
1590.41	3407		1659.08	20243	9117.05	11125.5	4493.74	20505.4	14696.6	1230.16	1713.6	112.789	10717.8	21151.4
1592.89	3350		1661.54	20091	9077.21	11117.4	4434.84	20455.7	14660.4	1230.84	1702.32	115.421	10659.2	21074.6
1595.36	3336		1664	19800	9017.42	10974.7	4384.63	20274.6	14654	1228.83	1700.36	113.579	10638.4	21091.2
1597.83	3478		1666.47	20031	9121.53	11170.5	4447.21	20560.5	14599.6	1230.88	1711.26	116.579	10609	21023.9
1600.3	3522		1668.93	19823	8957.84	10947.8	4355.42	20258.1	14566.6	1203.47	1700.36	111.947	10515.5	20892.2
1602.78	3651		1671.39	20054	9101.32	11154.2	4422.74	20627.4	14683.1	1222.06	1700.56	115.105	10588.4	20994.7
1605.25	3768		1673.86	19520	8854.53	10888.7	4321.47	20141	14549.7	1218.58	1695.63	111.789	10480.5	20800.7
1607.72	3793		1676.32	19723	8974	10991.4	4347.84	20377.5	14684.6	1234.74	1727.54	111.895	10631.2	21019.5
1610.19	3776		1678.79	19487	8948.79	10960.8	4331.37	20286.5	14594.5	1212.75	1700.71	108.105	10462	20896
1612.65	3831		1681.25	19804	9037.84	11119.7	4356	20537.2	14721.2	1227.88	1703.84	114.316	10561.5	21086.6
1615.12	3839		1683.71	19439	8919.16	10935.3	4306.1	20288	14545.6	1220.77	1707.93	111.053	10477.3	20842.7
1617.59	3832		1686.18	19439	8919.16	10935.3	4306.1	20288	14580	1226.44	1697.78	111.053	10465.1	20791.1
1620.05	3758		1688.64	19767	8935.63	11027.4	4315.42	20376.3	14479.9	1217.57	1694.8	113.368	10430.7	20696.6
1622.52	3805		1691.1	19576	8992.16	11021.6	4319.05	20460.3	14513.5	1220.25	1685.03	111.737	10469.4	20746.6
1624.98	3822		1693.57	19434	8834.89	10911.5	4261.42	20224.8	14481	1214.57	1674.36	111.632	10371.2	20674.4
1627.45	3792		1696.03	19214	8888.05	10970.9	4300.79	20306.4	14619.8	1223.55	1696.15	109.632	10490.6	20879.7
1629.91	3781		1698.49	19465	8989.79	11031.6	4332.63	20478.4	14492.3	1225.87	1679.88	112.368	10402.6	20663.2
1632.37	3871		1700.96	19200	8801.68	10879.6	4250.32	20186.4	14445.5	1226.23	1674.82	110.684	10393.6	20596.5
1634.84	3849		1703.42	19251	8911.89	10996.1	4287.79	20419.7	14474.2	1222.24	1676.88	110.842	10433.8	20658.1
1637.3	3908		1705.88	19168	8871.05	10884.8	4239.47	20250.3	14433.8	1203.38	1691.01	111	10357.1	20524.6
1639.76	3978		1708.35	19116	8831.32	10902.4	4234.95	20223	14420.2	1209.46	1676.06	110.211	10314.4	20513.8
1642.22	4108		1710.81	19256	8921.26	10977.3	4291.79	20430.8	14397.6	1211.68	1667.39	110.105	10281.8	20529
1644.67	4239		1713.28	18931	8795.11	10921.4	4236	20241.8	14445.8	1214.98	1683.8	109.368	10295.7	20601.5
1647.13	4461		1715.74	19128	8881.79	11011.2	4269.63	20387.5	14462.8	1214.77	1691.74	107.632	10293.8	20596.9
1649.59	4720		1718.2	18877	8914.21	10955.2	4281.42	20383	14448.9	1211.81	1674.77	111.053	10275.4	20543.2
1652.05	4831		1720.66	18792	8824.53	10973.5	4250	20302.3	14380.8	1212.12	1656.15	106.737	10215.3	20429.4
1654.5	4852		1723.13	18818	8849.53	10953.4	4240.79	20301.7	14319.7	1214.95	1652.73	106.789	10192.1	20348.7
1656.96	4959		1725.59	18815	8779.95	10897.7	4222.05	20147.3	14343.1	1202.28	1662.46	104.842	10196.9	20357.1
1659.41	5043		1728.06	18777	8849.95	10945.3	4232.1	20363.6	14341.9	1199.23	1673.98	104.737	10157	20335.6
1661.86	5146		1730.52	18709	8880.16	11010.8	4284.21	20426.5	14325.5	1214.66	1672.58	108.316	10148.4	20341.2
1664.32	5252		1732.98	18628	8868.26	11019.2	4260.84	20360.4	14283	1200.81	1665.85	105.789	10151.2	20326.7
1666.77	5200		1735.45	18449	8776.9	10908.4	4208.42	20234.2	14255.8	1186.63	1673.76	106.263	10167.9	20283.2
1669.22	5163		1737.91	18527	8860.68	10980.5	4246.74	20372.3	14329.4	1204.55	1673.31	102.053	10218.2	20305.5
1671.67	5091		1740.37	18462	8755.74	10898.7	4194.74	20212.3	14310.4	1211.33	1654.81	104.158	10244.1	20258.9
1674.12	5061		1742.84	18317	8753.42	10840.8	4188.68	20153.5	14398.6	1207.53	1662.32	105.474	10428.4	20389
1676.57	4900		1745.3	18426	8839.05	10993.8	4246.47	20341.9	14269.5	1213.41	1652.48	102.789	10540.5	20281.9
1679.02	4918		1747.76	18064	8726.05	10839.5	4206.37	20105.2	14210.1	1207.69	1645.61	106.053	10544.9	20102.8
1681.46	4665		1750.23	18223	8758.63	10875.1	4202.79	20188	14216.1	1191.41	1648.14	107.684	10532.2	20152.7
1683.91	4426		1752.69	18361	8847.47	10966.8	4223.16	20342.8	14312.7	1216.83	1656.72	102.526	10504.7	20269.6
1686.36	4345		1755.15	18054	8760.05	10874.8	4213.74	20198.2	13976.1	1175.52	1629.6	107.526	10133.8	19806.9
1688.8	4076		1757.62	17948	8702.32	10794.6	4212.32	20037.6	14354.1	1209.34	1648.61	109.316	10351.9	20267.8
1691.24	3883		1760.08	18101	8773.63	10887.1	4206.84	20190.6	14142.3	1193.2	1634.02	109.053	10111.3	19975.7
1693.69	3799		1762.55	17942	8725.16	10885.7	4196.95	20113	14277.3	1190.37	1649.36	103.263	10175.4	20165.7
1696.13	3674		1765.01	17660	8685.68	10804	4185.68	20011.6	14042.2	1183.52	1637.71	104.895	10012.7	19893.6
1698.57	3506		1767.47	17649	8674.42	10803.5	4171.47	20039	14255.9	1208.83	1654.74	105.053	10069	20139.6
1701.01	3398		1769.94	17815	8742.68	10903.7	4205.37	20206.5	14042.1	1186.04	1613.25	109.789	9954.34	19841
1703.46	3257		1772.4	17563	8668.21	10856.6	4191.58	20064.5	14101.8	1205.86	1632.22	106.579	9887.88	19891.8
1705.9	3127		1774.86	17797	8721	10916.3	4178.26	20190	14132.8	1207.6	1636.42	107.895	9945.01	19958.4
1708.33	3015		1777.33	17403	8714.05	10847.4	4183.42	20069.2	14002.7	1180.79	1637.67	104.789	9824.02	19744.4
1710.77	2952		1779.79	17627	8701.42	10888.1	4181.05	20138.5	14132.3	1199.67	1612.11	104.053	9974.81	19922.2
1713.21	2860		1782.25	17531	8664.16	10857.7	4170.79	20057.5	13915.9	1188.12	1619.89	106.684	9812.32	19635.9
1715.65	2889		1784.72	17480	8704.84	10847.5	4201.58	20133.6	14025.4	1184.18	1629.94	105.737	9856.08	19776.8
1718.08	2925		1787.18	17538	8746.16	10888.8	4205.53	20164.2	14001.9	1188.48	1632.82	103.947	9886.81	19744.9
1720.52	2872		1789.64	17369	8628.95	10771.6	4155.26	20023.7	13962.9	1184.04	1611.87	104.368	9830.82	19637.4
1722.95	2804		1792.11	17436	8678.21	10876.2	4192.26	20165	13912.9	1180.94	1597.8	103.789	9752.1	19559.8
1725.39	2775		1794.57	17352	8650.26	10842.9	4179.16	20075.4	13869.1	1186.3	1599.78	102	9786.66	19555.9
1727.82	2798		1797.04	17228	8670.05	10840.7	4171.79	20071.1	14027.1	1205.41	1611.33	103.789	9801.55	19708.1
1730.25	2742		1799.5	17248	8664.26	10869.7	4167.21	20065.1	14085.5	1195.59	1615.41	105.368	9829.69	19775.2
1732.69	2774		1801.96	17057	8629.21	10832.9	4146.74	19990.9	13906.3	1178.75	1600.81	101.368	9747.92	19586.1
1735.12	2833		1804.43	17248	8660	10862.4	4150.53	20045	13896.3	1184.12	1603.16	103.684	9704.59	19538.9
1737.55	2773		1806.89	17076	8681.53	10890.2	4195.53	20186.4	13921.9	1196.15	1600.76	105.263	9754.14	19577.2
1739.98	2774		1809.35	17056	8556.79	10732.7	4119.26	19868.4	13817	1185.11	1581.11	101.211	9675.76	19385.7
1742.4	2778		1811.82	16947	8583.37	10793.7	4131.63	19958.4	13862.4	1179.41	1592.74	100.053	9677.92	19403.6
1744.83	2861		1814.28	17108	8607.37	10803.1	4165.05	20031.2	13887.2	1180.16	1610.33	108.368	9721.91	19485.3
1747.26	2900		1816.74	16957	8611.05	10862.1	4155.32	20015.6	13898.8	1178.66	1608.26	104.053	9711.42	19472
1749.69	2855		1819.21	16943	8616	10791.2	4128.31	19979.6	13901.7	1179.84	1609.91	104.842	9690.83	19436.4
1752.11	2935		1821.67	16927	8607.32	10810.7	4152.79	19992.3	13795.7	1178.88	1608.54	100.947	9629.37	19325.7
1754.54	2867		1824.13	16842	8616.32	10795.3	4132.79	19943	13897.1	1191.01	1605.06	101.632	9709.5	19458.3
1756.96	2902		1826.6	16818	8681.16	10915.2	4173.63	20127.3	13896.2	1193.66	1590.89	102.842	9700.37	19446
1759.39	2849		1829.06	16745	8621.79	10812.7	4145.21	20020.8	13757.5	1176.56	1568.13	102.632	9555.02	19230
1761.81	2821		1831.53	16665	8579.47	10775.1	4142.84	19949.4	13803.8	1173.9	1580.91	102.263	9633	19260.1
1764.23	2894		1833.99	16622	8570.58	10796.3	4110.9	19951.4	13817.1	1184.07	1603.27	101.263	9629.57	19308.8
1766.65	2852		1836.45	16776	8651.53	10875.7	4160.05	20071.1	13910.9	1184.88	1603.37	102.684	9748.75	19492.1
1769.07	2905		1838.92	16750	8607.37	10866.1	4145.47	20088.7	13660.6	1174.62	1586.92	101.105	9587.25	19155.9
1771.49	2982		1841.38	16480	8573.89	10752.5	4140	19905.6	13684.6	1180.55	1601.46	104.211	9577.88	19181.4
1773.91	2975		1843.84	16509	8565.63	10774.5	4121.26	19880.6	13648.5	1175.75	1583.03	104.316	9573.79	19167
1776.33	2924		1846.31	16404	8583	10836.6	4159.16	19952.6	13844.5	1177.18	1597.74	102.421	9618.71	19331.4
1778.75	2965		1848.77	16745	8615.58	10871.5	4150.79	20043.6	13753.3	1169.18	1568.91	102.263	9478.68	19154.1
1781.16	2996		1851.23	16599	8535.89	10809.8	4127.58	19961.3	13815.6	1176.62	1593.81	101.632	9563.16	19239
1783.58	2908		1853.7	16098	8512.79	10766.5	4122.53	19814.9	13569.6	1155.47	1580.8	102.579	9475.03	18980.3
1786	2798		1856.16	16313	8594.63	10834.4	4132.26	19976.1	13797.9	1175.26	1608.49	101.053	9673.52	19320.8
1788.41	2883		1858.62	16365	8543.58	10789.9	4119.68	19879.7	13484	1156.14	1548.66	101.632	9438.51	18862.5
1790.83	2899		1861.09	16362	8560.42	10796.2	4114.68	19913.9	13673.3	1168.44	1582.54	98.842	9495.39	19072.1
1793.24	2875		1863.55	16222	8556.16	10790.6	4120.68	19877.2	13757.3	1186.82	1575.54	100.105	9552.12	19090.8
1795.65	2855		1866.02	16139	8455.26	10707.1	4067.37	19774.1	13556.7	1159.49	1556.8	98.158	9404.26	18934.5
1798.06	2855		1868.48	16171	8556.47	10794.1	4120.95	19894	13604.8	1154.12	1580.1	100.579	9396.09	18947.4
1800.47	2762		1870.94	15958	8457.21	10679.8	4065.84	19657.4	13532.6	1153.87	1565.88	103.053	9451.47	18873.2
1802.88	2829		1873.41	16095	8519.11	10803.3	4124.53	19913.3	13624.8	1154.99	1576.68	104.053	9422.91	18902
1805.29	2827		1875.87	16182	8545.74	10844.3	4130.84	19909.2	13610.4	1170.05	1565.97	101.895	9422.59	18950.8
1807.7	2774		1878.33	15916	8421.53	10695.4	4072.05	19699.4	13515.5	1169.15	1556.38	101.316	9350.04	18829.6
1810.11	2717		1880.8	15826	8444.26	10668.2	4075.68	19685.5	13432.3	1163.31	1542.41	100.947	9321.31	18727.6
1812.52	2772		1883.26	15732	8421.74	10665.7	4049.63	19681.2	13400	1157.24	1565.2	99.053	9352.31	18679.4
1814.93	2762		1885.72	15771	8446.58	10668.8	4061.47	19633.3	13526.2	1164.25	1566.24	97.947	9377.55	18790.2
1817.33	2755		1888.19	15662	8379.05	10613.3	4043.42	19524.9	13416.2	1156.1	1558.73	98	9326.99	18680.2
1819.74	2733		1890.65	15904	8496.79	10774.5	4086.58	19826.9	13376.6	1146.23	1544.3	103.368	9264.52	18549.5
1822.14	2714		1893.11	15621	8378.11	10656.2	4044	19588.4	13408.6	1151.65	1530.29	96.368	9261.35	18570.8
1824.55	2768		1895.58	15524	8372.58	10578.7	4059	19560.7	13405.4	1147.43	1530.3	97.684	9302.92	18650
1826.95	2735		1898.04	15589	8372	10638.5	4058.95	19636.8	13366	1152.89	1540.54	99.632	9260.17	18598.4
1829.35	2715		1900.51	15269	8326.9	10611.2	4022.84	19469.6	13292.7	1158.54	1535	99.737	9190.81	18459.3
1831.75	2683		1902.97	15543	8336.84	10603.4	4044.58	19523.5	13286.4	1148.4	1525.99	103.105	9220.04	18445.2
1834.15	2698		1905.43	15515	8342.68	10609.4	4001.79	19507.8	13326.7	1145.58	1530.86	98.632	9217.21	18478.8
1836.55	2664		1907.9	15230	8394.1	10656.9	4061.32	19597.8	13250.1	1147.27	1527.07	102.632	9159.59	18387.2
1838.95	2732		1910.36	15471	8353.79	10658.6	4032.84	19565.6	13207.1	1142.62	1518.76	97.947	9163.49	18319.6
1841.35	2751		1912.82	15499	8372.58	10628.2	4064.84	19511.6	13287.2	1144.95	1521.45	102	9165.54	18381.9
1843.75	2837		1915.29	15310	8289.21	10520.8	4011.32	19379.4	13238.9	1142.26	1519.98	97.421	9153.74	18366.8
1846.15	2826		1917.75	15171	8262.47	10498.7	3981.42	19331.8	13203.7	1133.8	1514.61	98.684	9150.38	18295.9
1848.54	2814		1920.21	15271	8291.58	10568	4012	19416.2	13230.8	1151.18	1507.26	97.842	9094.44	18301.1
1850.94	2727		1922.68	15258	8258.58	10563.1	3998.42	19383.8	13164.5	1144.85	1502.59	98.737	9022.97	18206.6
1853.34	2776		1925.14	15208	8339.74	10620.5	4039.26	19489.1	13186.3	1143.4	1512.3	97.895	9058.92	18286.8
1855.73	2782		1927.6	15078	8214.63	10476.9	3995.74	19263.5	13144.8	1142.8	1507.59	98.789	9062.5	18252.4
1858.12	2722		1930.07	15187	8308.53	10604	4004.58	19453.8	13110.9	1136.92	1505.23	96.895	9015.01	18168.9
1860.52	2791		1932.53	15054	8264.68	10499.8	3997.79	19261.3	13242.7	1151.89	1494.29	98.842	9120.14	18294.9
1862.91	2738		1934.99	15236	8337	10678.2	4038.42	19518.5	13173.8	1135.92	1499.19	98.316	9013.5	18128
1865.3	2760		1937.46	14880	8285.1	10604.7	4017.79	19420.7	13148.5	1150.31	1488.01	99.842	9006.13	18120.4
1867.69	2783		1939.92	14887	8221.37	10469.8	3972.21	19255.9	13050.3	1148.29	1486.17	95.368	9041.97	18077.9
1870.08	2798		1942.38	14908	8234.16	10531.3	3981.53	19234.2	12962.1	1128.26	1495.52	97.684	8944.53	17899.6
1872.47	2728		1944.85	15142	8367.11	10667.5	4031.84	19469.2	13129.7	1142.66	1490.51	99.789	9008.89	18094.6
1874.86	2759		1947.31	14613	8063.05	10324.1	3905.11	18928.8	13193	1129.49	1480.03	94.737	9014.48	18105.2
1877.25	2771		1949.78	14924	8332.69	10659.1	4028.79	19502	12954.7	1134.4	1476.23	99.684	8908.85	17923
1879.63	2789		1952.24	14745	8177.21	10480.1	3977.21	19198.7	12939.3	1135.39	1468.06	97	8870.2	17874.5
1882.02	2758		1954.7	14798	8277.16	10583.7	4022.37	19396.5	13198.6	1156.16	1500.15	100.158	9042.1	18127.2
1884.41	2783		1957.17	14581	8176.47	10439.6	3949.89	19125.7	12979.3	1137.62	1464.9	98.158	8949.69	17895.7
1886.79	2791		1959.63	14874	8308.42	10558.2	4027.68	19355	13047.7	1148.17	1488.72	94	8954.85	17993.3
1889.18	2824		1962.09	14589	8149.05	10486.9	3975.26	19179.3	12956.6	1140.64	1483.29	95.789	8938.26	17881.6
1891.56	2772		1964.56	14700	8166.79	10520.7	3947.16	19163.6	12996.6	1134.47	1474.79	96.579	8962.36	17900.9
1893.94	2743		1967.02	14838	8216.58	10554.8	3991.11	19222.8	12897.8	1124.13	1474.08	96.684	8849.99	17818
1896.32	2715		1969.48	14679	8255.74	10521.1	4005.26	19254.3	12971.1	1130.75	1474.83	97.526	8845.04	17893
1898.71	2854		1971.95	14739	8141.89	10474.5	3951.95	19140.2	12944.8	1126.6	1470.04	95.737	8787.29	17790.2
1901.09	2864		1974.41	14678	8245.79	10522.8	4007.37	19308	12814.4	1114.31	1457.03	99.316	8724.47	17619.7
1903.47	2787		1976.88	14495	8091.16	10398.1	3911.26	18986.4	12874.9	1122.75	1456.84	98.526	8799.68	17662.1
1905.85	2822		1979.34	14537	8212.32	10546.1	3977.42	19259.1	12816.7	1116.57	1449.66	95.895	8852.6	17672.2
1908.22	2801		1981.8	14354	8163.84	10471.1	3970.11	19135.7	12742.4	1105.31	1451.34	97	8739.77	17512
1910.6	2801		1984.27	14322	8121.79	10428.9	3937.53	19054.4	12805.2	1129.96	1461.45	95.737	8768.03	17560.6
1912.98	2786		1986.73	14307	8076.95	10404.1	3924.63	18976.5	12808.7	1126.21	1470.68	93.368	8775.08	17614.1
1915.36	2867		1989.19	14506	8176.11	10550.5	3970.47	19205.5	12814.8	1116.05	1465.87	97.579	8764.31	17612.1
1917.73	2899		1991.66	14291	8178.42	10490.5	3978.32	19157.3	12796.2	1116.63	1448.13	95.526	8712.84	17530.3
1920.11	2866		1994.12	14261	8041	10393.7	3902.47	18905.7	12672.4	1113.69	1433.68	97.947	8636.39	17395.2
1922.48	2923		1996.58	14346	8085.89	10436.4	3933.53	18997.3	12685	1128.84	1434.15	98.947	8690.05	17466.8
1924.85	2919		1999.05	14241	8084.58	10406.9	3914.9	19030.6	12777.3	1131.62	1439.18	98.526	8705.68	17528
1927.23	2905		2001.51	13808	7970.26	10260.4	3869.26	18754.4	12741.1	1113.81	1432.85	92.474	8644	17429.8
1929.6	2860		2003.97	14269	8105.05	10427.8	3942.11	19057.7	12679.2	1104.32	1418.51	95.211	8586.69	17332.2
1931.97	2898		2006.44	14184	8009.84	10310.7	3901.95	18855.3	12628.9	1104.92	1410.66	94.316	8587.63	17269.8
1934.34	2966		2008.9	14034	8111.11	10455.6	3927.11	19007.7	12671.2	1120.13	1425.54	96.474	8667.48	17376.2
1936.71	2986		2011.37	13939	8000.79	10290.7	3875.05	18820.5	12656.5	1115.95	1422.01	95.053	8601.89	17302.7
1939.08	2876		2013.83	13955	8011	10368.8	3893.16	18816.2	12621.4	1108.83	1427.81	95.421	8594.39	17271.7
1941.45	2877		2016.29	14067	8118.11	10462.5	3933	19036	12586.6	1110.35	1425.74	96.842	8534.44	17169.3
1943.82	2880		2018.76	13791	7941.68	10268.8	3878.26	18691.5	12574.5	1116.78	1427.38	92.947	8530.85	17199.3
1946.18	2953		2021.22	13952	7979.16	10320.8	3877.53	18778.3	12645.9	1113.95	1421.49	96.158	8595.04	17323.5
1948.55	2923		2023.68	13803	7961.58	10280.5	3870.58	18710	12575.6	1090.43	1398.86	93.316	8493.55	17111.5
1950.92	2936		2026.15	14126	8090.47	10507.2	3942.05	19064.6	12604.7	1103.54	1418.75	98.579	8573.16	17254.1
1953.28	2964		2028.61	13696	7923	10270.2	3864.16	18643.8	12513	1098.97	1419.33	95.211	8506.77	17065.8
1955.64	2868		2031.07	13704	7949.84	10259.9	3848.42	18645	12551.2	1090.64	1409.51	90.737	8527.18	17125.9
1958.01	2860		2033.54	13610	7922.74	10239.1	3864.68	18645.9	12590.9	1117.41	1426.58	93.474	8501.45	17132.6
1960.37	2895		2036	13867	8001.21	10355.6	3904.53	18841.4	12485.5	1097.56	1401.21	96.211	8525.15	17071.9
1962.73	2879		2038.46	13699	7923.21	10322.6	3871.05	18739.3	12380.6	1099.07	1391.16	90.105	8415.02	16934.5
1965.09	2889		2040.93	13692	7916.47	10278.8	3825.89	18615.8	12469.6	1104.36	1387.11	91.579	8415.31	16925
1967.46	2911		2043.39	13825	7988.16	10346.2	3916.68	18802	12429.2	1105.59	1375.26	96.263	8393.24	16920.3
1969.82	2859		2045.86	13427	7891.05	10250.6	3850.26	18577.6	12491.4	1106.95	1375.51	95.053	8404.61	16962
1972.17	2888		2048.32	13695	8010.05	10422.6	3879.68	18893.2	12403.2	1097.53	1381.8	94.368	8384.68	16927.3
1974.53	2863		2050.78	13424	7848.47	10173.4	3822.05	18487.5	12488.9	1100.27	1406.63	94.526	8460.59	17025
1976.89	2861		2053.24	13336	7928.42	10286.1	3869.05	18668.2	12344.3	1094.38	1372.94	92.105	8426.81	16784.4
1979.25	2826		2055.71	13576	7933.63	10387.8	3878	18753.9	12406.7	1109.59	1385.09	94.263	8453.21	16877.5
1981.6	2867		2058.17	13672	7912.84	10284.8	3856.68	18616.8	12325.4	1097.96	1380.83	92.895	8330.55	16778.2
1983.96	2936		2060.64	13432	7881.53	10207.6	3849.68	18551.4	12319.6	1097.47	1383.32	92.947	8346.98	16842.1
1986.32	2862		2063.1	13494	7898.95	10302.1	3864.95	18654.6	12311.8	1078.82	1373.25	94.947	8370.35	16833.2
1988.67	2849		2065.56	13593	7950.84	10314.1	3880.79	18688.3	12324	1090.41	1374.21	92.842	8366.99	16809.6
1991.02	2886		2068.03	13506	7866.58	10274.7	3839.79	18497.4	12335.9	1101.41	1379.47	91.263	8345.2	16783
1993.38	2905		2070.49	13280	7858.11	10204.1	3811.74	18517.2	12311.5	1097.87	1382.23	92.368	8320.19	16785
1995.73	2904		2072.95	13419	7845.05	10228.5	3826.79	18485.2	12341.2	1090.51	1375.99	95.579	8335.68	16789.2
1998.08	2921		2075.42	13431	7937	10291.3	3867.1	18644.5	12340.6	1088.41	1367.04	92.579	8371.17	16788.1
2000.43	2951		2077.88	13294	7828.26	10180.5	3829.42	18435.1	12276.8	1092.04	1345.95	94.211	8300.17	16663
2002.78	2873		2080.34	13285	7809.47	10173.6	3831.58	18434.5	12279.4	1095.9	1334.58	92.526	8258.57	16619.8
2005.13	2845		2082.81	13240	7837.32	10202.2	3822.68	18503.8	12267.7	1098.4	1346.46	93.263	8267.05	16653.7
2007.48	2868		2085.27	13118	7866.74	10263.5	3835.26	18525.5	12173.8	1101.63	1349.23	93.421	8244.28	16563.6
2009.83	2898		2087.74	13254	7794.79	10223.6	3808.89	18485.6	12154.9	1095.88	1342.62	93.474	8246.93	16512.8
2012.17	2940		2090.2	13230	7800.74	10168.2	3809.21	18386.4	12238.9	1090.89	1341.16	94.158	8261.41	16604
2014.52	2888		2092.66	13320	7838.79	10182.6	3812.53	18413	12218.4	1095.14	1341.23	93.105	8232.61	16592.4
2016.87	2917		2095.13	13102	7814.05	10236.9	3836.26	18496.4	12113.6	1083.92	1346.46	97.105	8181.5	16436.3
2019.21	2978		2097.59	13116	7825.53	10178.8	3807.05	18405.5	12165.6	1082.15	1342.06	94.211	8240.77	16509.2
2021.56	2955		2100.05	13184	7764.42	10143.8	3815.05	18283.4	12142	1085.57	1323.36	92.263	8139.53	16409.6
2023.9	2903		2102.52	13016	7803.68	10196.9	3805.11	18374.2	12194.7	1097.22	1321.06	94.158	8141.26	16458.5
2026.24	2917		2104.98	13108	7785.68	10167.5	3824.11	18395.5	12148.6	1096.79	1340.61	90.211	8176.84	16442.8
2028.59	2961		2107.44	12949	7738.26	10112.8	3778.21	18268.6	12042.7	1095.36	1348.33	90.316	8097.64	16320.9
2030.93	3052		2109.91	13136	7774.26	10182.1	3785.47	18326.1	12109.2	1090.67	1321.1	90	8116.57	16340
2033.27	3032		2112.37	12855	7761	10131.5	3810.63	18304.6	12007.9	1070.28	1312.98	89.632	8066.05	16253.6
2035.61	2974		2114.83	12904	7753.63	10109.4	3772.1	18331.8	12127.9	1085.9	1334.28	93.579	8100.24	16361.9
2037.95	3000		2117.3	12852	7677.21	10051.8	3764.05	18141.6	11958.6	1079.26	1299.11	90.211	8023.44	16167.5
2040.29	2910		2119.76	12979	7788.58	10119.8	3803.42	18276.4	11910.2	1062.85	1292.41	93.579	7986.14	16101.4
2042.62	2938		2122.22	12874	7718.47	10112.9	3768	18231	11956.7	1069.85	1312.41	93.684	8057.74	16146.2
2044.96	2979		2124.69	12670	7703.47	10079.6	3769.74	18141.8	11978.2	1088.32	1304.87	91.684	8035.2	16179.7
2047.3	3045		2127.15	12870	7682.95	10041.1	3744.58	18130.5	11908	1064.88	1301.96	93.421	8024.74	16092.5
2049.63	3001		2129.61	12551	7596	9987.95	3706.42	18002.6	11922.9	1071.19	1301.57	92.947	8074.35	16081.7
2051.97	3091		2132.08	12714	7672.32	10073.7	3780.63	18078.2	12001.3	1061.41	1299.51	93.526	8059.71	16128.8
2054.3	3019		2134.54	12665	7699.26	10105.4	3793.26	18200	11816.3	1061.95	1282.94	92.632	7939.1	15913.4
2056.64	2963		2137.01	12547	7609.58	9984.9	3730.16	17970.9	11879.4	1067.89	1272.14	89.947	7971.37	16040.8
2058.97	2992		2139.47	12345	7566.58	9962	3702.47	17888.2	11779.2	1064.86	1270.03	91.421	7911.37	15853.1
2061.3	2931		2141.93	12707	7695.68	10125.5	3772.42	18201.2	11741.1	1057.53	1286.84	89.947	7925.07	15856.3
2063.64	2972		2144.4	12316	7598.74	9953.32	3739.53	17922.7	11781.1	1056.52	1269.96	94.421	7947.71	15911.3
2065.97	2977		2146.86	12334	7565.84	9889.06	3693.37	17845.6	11825.1	1061.62	1269.68	90	7947.34	15885.5
2068.3	2932		2149.32	12632	7630.95	10051.6	3752.74	18036.4	11640.1	1052.7	1258.82	90.474	7911.33	15780.1
2070.63	3054		2151.79	12513	7589.84	9969.58	3713.21	17909.7	11646.8	1049.87	1247.73	90.526	7864	15723.3
2072.96	2963		2154.25	12403	7619.68	9964.68	3741.58	17965.5	11789	1046.82	1262.13	88.105	7838.82	15774.8
2075.29	2959		2156.71	12429	7570.21	9942.32	3704.84	17879.4	11681	1046.76	1259.98	89.158	7822.78	15729.6
2077.61	3015		2159.18	12397	7563.53	9963.48	3716	17888.3	11616.9	1048.63	1260.47	89.053	7822.15	15646.5
2079.94	3093		2161.64	12213	7488.21	9856.74	3664.16	17681.9	11625.5	1045.88	1249.97	87.316	7815.91	15615.6
2082.27	3106		2164.11	12255	7564.68	10013.8	3710.74	17872.7	11622.2	1047.3	1242.69	85.947	7782.26	15616.2
2084.59	3017		2166.57	12383	7513.89	9903.84	3671.32	17695	11591.2	1045.53	1228.73	89.789	7748.15	15556.6
2086.92	3018		2169.03	12158	7448.42	9870.1	3673.26	17645.7	11614.5	1043.53	1235.06	88.263	7749.3	15565.6
2089.24	3010		2171.5	12244	7572.21	9951.16	3711.58	17843	11581.1	1044.44	1249.08	92.684	7750.71	15541.6
2091.56	3097		2173.96	12221	7492.05	9904.32	3693	17707.1	11520.1	1040.61	1245.85	89	7760	15506.4
2093.89	3094		2176.42	12240	7542.47	9922.47	3719.63	17751.3	11514.4	1034.52	1241.38	90.053	7719.24	15489.1
2096.21	3057		2178.89	12222	7424.9	9811.79	3667.16	17590.8	11451.8	1028.75	1222.56	88.789	7631.73	15365.5
2098.53	3062		2181.35	12048	7417	9773.58	3639.58	17531.5	11492.1	1029.89	1218.01	85.105	7684.54	15415
2100.85	3083		2183.81	12241	7520.89	9904.63	3718.79	17738.3	11546.1	1038.19	1228.54	89	7748.54	15475.9
2103.17	3100		2186.28	12040	7492.37	9867.37	3679.32	17723.6	11473.1	1039.84	1218.16	90.316	7682.66	15374.2
2105.49	3131		2188.74	12078	7481.47	9858.9	3698.32	17697.6	11466.3	1035.63	1214.68	91.526	7638.33	15325.4
2107.81	3132		2191.2	12090	7489.74	9856.84	3659.21	17603.5	11491.5	1035.4	1234.78	92.947	7668.67	15371.3
2110.13	3173		2193.67	11900	7394.47	9799.95	3638.89	17514	11442.1	1039.64	1221.87	91.421	7640.83	15329.7
2112.44	3099		2196.13	12103	7473.53	9830.32	3687.05	17646.6	11402.7	1034.68	1219.27	92.789	7628.38	15266.5
2114.76	3107		2198.59	11914	7456.84	9862.74	3680.63	17622.6	11390.7	1037.04	1216.55	93.368	7615.57	15303.5
2117.08	3135		2201.06	11878	7406.53	9858.26	3660.1	17550	11458	1034.78	1218.67	91.684	7592.94	15251.2
2119.39	3158		2203.52	11972	7440.37	9850	3652.32	17586.5	11340.1	1029.81	1192.53	94.368	7602.49	15171.3
2121.71	3167		2205.99	11921	7478.11	9905.84	3676.42	17670.5	11310.1	1029.37	1198.61	90.211	7543.68	15136.6
2124.02	3205		2208.45	11788	7380.05	9768.58	3642.32	17412	11249.4	1014.69	1195.18	89.474	7513.87	15064.4
2126.33	3112		2210.91	11981	7452.32	9867.21	3676.89	17542.1	11265.8	1018.28	1184.36	86.316	7586.79	15132.3
2128.65	3185		2213.38	11841	7385.84	9796.68	3629	17425	11211.5	1017.21	1170.86	89.474	7451.8	14999.1
2130.96	3208		2215.84	11638	7403.11	9779.37	3621.37	17445.4	11411.5	1039.57	1191.28	89.105	7592.57	15209.5
2133.27	3223		2218.3	11805	7400.16	9875.21	3658.89	17543	11158.8	1006.09	1165.81	94.579	7445.54	14960.7
2135.58	3235		2220.77	11723	7377.42	9760	3639.47	17424.3	11235.6	1029.14	1184.11	88.947	7510.95	15028.1
2137.89	3238		2223.23	11627	7325.53	9750.79	3617.53	17326.4	11180.4	1015.34	1162.61	84.895	7418.62	14893
2140.2	3165		2225.69	11673	7351.16	9771.53	3638.32	17407.4	11311.8	1016.94	1171.03	89.684	7468.01	15009.7
2142.51	3112		2228.16	11531	7339.47	9758.9	3633.37	17331.8	11187.5	1012.29	1166.48	90.526	7388.88	14875.6
2144.81	3140		2230.62	11635	7330.79	9740.58	3634.84	17360.2	11068.6	1002.36	1151.02	90.632	7311.96	14725.3
2147.12	3200		2233.09	11729	7349.63	9765.32	3652.16	17344.4	11074.5	1003.84	1152.16	89.105	7326.22	14738.2
2149.43	3165		2235.55	11654	7305.16	9678	3609.26	17238.8	11092.1	1004.02	1158.32	87.947	7302.59	14699
2151.73	3175		2238.01	11749	7382.95	9828.58	3648.63	17443	11014	992.054	1151.18	89.789	7294.21	14570.7
2154.04	3205		2240.47	11536	7315.79	9771.84	3628.26	17284.3	11038.4	991.067	1158.96	89.842	7264.28	14579.4
2156.34	3191		2242.94	11564	7268.26	9720.95	3594.95	17195.7	11099	1003.81	1159.19	89	7305.33	14661.7
2158.64	3140		2245.4	11539	7283.1	9724.37	3619.26	17253	11079.4	1006.91	1145.85	92.053	7296.27	14636.8
2160.95	3189		2247.87	11353	7262.63	9690.68	3588.9	17175.2	11027.7	996.338	1138.74	87.684	7239.42	14535.5
2163.25	3209		2250.33	11453	7292	9685.79	3589.84	17210.1	11046.2	1008.43	1127.22	89.579	7278.05	14563.1
2165.55	3167		2252.79	11328	7263.42	9699.84	3619.26	17212	11038	1008.91	1125	90.632	7272.82	14540.7
2167.85	3179		2255.26	11507	7290.42	9653.26	3616.84	17177.5	10974.1	1003.89	1135.59	89.684	7227.47	14494.2
2170.15	3141		2257.72	11476	7271.16	9716.47	3594.37	17195.1	10864.6	995.071	1125.15	88.211	7205.7	14408.9
2172.45	3129		2260.18	11291	7224.68	9605.95	3570.16	17035.4	10742.3	977.856	1102.63	85.368	7121.42	14269
2174.75	3165		2262.65	11462	7281.95	9746.95	3592.42	17214.8	10766.4	981.157	1104.77	92.211	7089.03	14270.2
2177.05	3183		2265.11	11207	7203.63	9601.79	3558.53	17014.3	10759.5	985.894	1105.5	89.947	7101.36	14250.8
2179.34	3167		2267.57	11364	7259	9699.26	3593.68	17143.3	10694.5	981.981	1097.12	91.789	7046.05	14196.4
2181.64	3207		2270.04	11212	7198.21	9635.79	3573.79	17052.6	10749.2	984.22	1105.74	94.158	7047.4	14225.1
2183.94	3179		2272.5	11216	7156.21	9605.05	3576.11	16940.6	10662	975.215	1094.09	90.316	7046.24	14134.6
2186.23	3127		2274.97	11425	7277.58	9768.58	3594.74	17183.2	10654.2	975.629	1079.76	93.947	7033.65	14168
2188.53	3212		2277.43	11173	7163.21	9570.37	3565.63	16901.7	10709.9	982.484	1092.47	89.842	7050.31	14166
2190.82	3193		2279.89	11222	7196.63	9649.53	3560.47	16993.4	10708	980.406	1089.76	94.947	7040.6	14108.8
2193.11	3187		2282.36	11006	7148.26	9617.37	3537.47	16928.7	10640.8	968.799	1080.26	90.842	7014	14028.3
2195.41	3158		2284.82	11154	7178.37	9594.68	3581.74	16962	10646.7	961.808	1091.55	90.474	7041.7	14098.5
2197.7	3084		2287.28	11147	7216.53	9661.53	3572.16	17033.2	10566.6	965.871	1085.97	94.474	6989.34	14015.4
2199.99	3200		2289.75	10962	7109.05	9531.79	3538.47	16795.4	10551.9	967.643	1073.69	88.632	7011.81	13956.9
2202.28	3228		2292.21	11067	7143.11	9541.74	3567.74	16856.6	10527.9	966.132	1073.77	85.789	6954.38	13889.1
2204.57	3192		2294.67	10983	7108.63	9549.37	3564.74	16827.9	10613.5	981.851	1089.1	91	6992.93	13999.5
2206.86	3171		2297.14	10900	7094.89	9510.47	3552.26	16775.5	10589.1	972.234	1070.43	86.316	6992.88	13966.4
2209.15	3186		2299.6	11059	7194.05	9658	3589.58	16989.9	10458.8	960.297	1060.09	89.421	6935.22	13806
2211.44	3221		2302.06	10865	7104.58	9534.53	3546.53	16738.4	10440.8	959.454	1069.8	87.421	6898.6	13822.5
2213.72	3215		2304.53	10907	7070.05	9469.32	3519.53	16679.4	10445.9	960.211	1063.32	89.158	6849.73	13753.2
2216.01	3208		2306.99	10968	7121.37	9533.42	3538.47	16840.2	10508	971.29	1054.5	87.842	6997.91	13822.5
2218.29	3220		2309.45	10808	7056.68	9508.68	3526.79	16747.2	10521.3	969.918	1051.11	87.053	6869.16	13803.7
2220.58	3231		2311.92	10832	7071.32	9474.16	3539.63	16688.6	10548.2	965.165	1064.73	85.842	7000.88	13877.7
2222.86	3169		2314.38	10853	7120.05	9575.37	3554.95	16782.6	10537.2	960.681	1061.07	88.158	6962.23	13877.1
2225.15	3209		2316.84	10692	7006.68	9483.21	3521.74	16618.2	10480.2	965.663	1052.62	86.632	6940.53	13849.4
2227.43	3240		2319.31	10855	7085.68	9493.95	3555.63	16653.7	10418.1	955.83	1042.02	87.368	6828.81	13687.8
2229.71	3317		2321.77	10631	7017.79	9465.53	3497.79	16582.5	10434.2	952.564	1044.93	84.263	6835.24	13705.2
2232	3340		2324.24	10680	7013.53	9411.95	3510.37	16600.6	10473.6	960.398	1047.92	83.632	6831.22	13720.7
2234.28	3235		2326.7	10706	7049.16	9465.21	3517.84	16581.6	10504.8	955.031	1049.59	86.579	6873.35	13720.8
2236.56	3211		2329.16	10867	7037	9501.16	3523.53	16602.7	10464.7	965.216	1050.47	87.105	6930.5	13727.7
2238.84	3167		2331.63	10617	7036.95	9500.26	3542.63	16598.2	10343.7	954.732	1047.94	88.842	6833.5	13545.9
2241.11	3245		2334.09	10479	6971.47	9378	3485.58	16407.4	10351.1	946.679	1043.83	84.789	6782.21	13554.8
2243.39	3267		2336.55	10737	7023.1	9499.48	3531.74	16660.5	10319.1	940.77	1021.68	83.421	6712.54	13503.9
2245.67	3304		2339.02	10617	6943.74	9390.63	3494.26	16424.3	10348.3	950.138	1027.74	83.842	6760.09	13578.4
2247.95	3230		2341.48	10596	6975.74	9415.95	3509.89	16434.2	10308.3	945.225	1036.31	82.895	6784.99	13534.5
2250.22	3343		2343.95	10716	6933.05	9371.68	3494.68	16433.3	10256.5	940.421	1023.49	83.316	6720.65	13430.8
2252.5	3247		2346.41	10367	6954.95	9392.42	3519.58	16435.5	10184.8	938.306	1009.9	83.842	6670.33	13324.4
2254.77	3271		2348.87	10253	6902.95	9277.16	3454.05	16277.2	10223.8	936.501	1004.89	79.053	6696.63	13344.8
2257.05	3287		2351.34	10554	6985.84	9427.79	3507.68	16478	10276.5	937.893	1007.59	82.789	6720	13401.7
2259.32	3259		2353.8	10513	7021.21	9472.1	3523.1	16515.6	10222.3	943.43	1014.88	84.368	6709.67	13373.5
2261.6	3248		2356.26	10326	6906.63	9378.21	3463.47	16346	10189.9	942.453	1016.25	78.632	6690.62	13358.1
2263.87	3231		2358.73	10345	6954.58	9376.1	3497.26	16336.3	10127	926.225	1011.77	81.789	6646.48	13274.4
2266.14	3265		2361.19	10222	6893.16	9257.53	3441.37	16180	10172.9	933.495	1009.12	82.526	6676.25	13315.3
2268.41	3284		2363.65	10413	6955.47	9428.84	3508.37	16410.4	10146.8	937.54	995.942	84.211	6661.23	13250.8
2270.68	3321		2366.12	10314	6888.89	9281.37	3473.79	16236.6	10096.5	934.688	986.379	82.053	6587.93	13164.6
2272.95	3336		2368.58	10174	6869.58	9315.52	3473.26	16243.8	10014.3	928.239	985.867	81.895	6548.04	13101
2275.22	3311		2371.04	10363	6909.26	9370.1	3449.05	16310.7	10111.7	934.537	984.544	80.368	6608.77	13207.5
2277.49	3316		2373.51	10151	6886.58	9344	3483.63	16255.8	10091.1	933.147	984.474	82.474	6583.87	13140.2
2279.75	3249		2375.97	10219	6872.68	9310.79	3482.42	16156.6	10079.4	935.287	985.504	80.316	6561.09	13132.9
2282.02	3300		2378.43	10238	6903	9316.58	3458.74	16167.5	9987.67	926.963	973.494	83.947	6506.61	13000.4
2284.29	3272		2380.9	10112	6839.58	9307.84	3450.32	16143	9975.94	932.963	974.888	83.158	6520.02	13041.7
2286.55	3249		2383.36	10120	6866.84	9311.74	3470.95	16195.1	10017.8	925.321	962.757	79.737	6491.88	12988.4
2288.82	3328		2385.82	10040	6851.9	9254.63	3454.84	16065	9965.25	920.859	968.951	81.737	6455.13	12941.3
2291.08	3426		2388.29	10094	6859.47	9280.48	3467.32	16177	9916.51	927.985	961.512	83.737	6487.88	12919.8
2293.34	3377		2390.75	10151	6842.84	9255.26	3462.05	16054.4	9811.74	906.942	967.684	82.158	6469.99	12789.1
2295.61	3380		2393.22	9991	6801.21	9248.32	3428.26	16020.3	9946.8	934.817	968.657	84.632	6497.7	12853.4
2297.87	3313		2395.68	10019	6874.05	9381.58	3480.26	16183.8	9716.88	905.084	946.654	82.105	6334.03	12665.1
2300.13	3331		2398.14	9959	6785.16	9222.42	3419.42	15934.8	9842.44	927.769	948.996	83.526	6400.37	12814.5
2302.39	3363		2400.61	9951	6832.42	9265.16	3441.58	16013.5	9850.28	930.25	951.941	82.368	6418.87	12797.7
2304.65	3408		2403.07	9963	6741.84	9169.32	3422.21	15895.5	9845.52	907.874	943.629	80.579	6381.58	12742.3
2306.91	3380		2405.53	9788	6773.11	9206.68	3424.42	15916.5	9816.33	912.722	946.984	83.526	6395.61	12688.5
2309.17	3324		2408	9766	6802.84	9248.63	3451.79	15985.7	9834.49	907.065	957.478	84.895	6411.35	12723.2
2311.43	3322		2410.46	9832	6745.63	9215.84	3421.84	15895.3	9705.54	908.474	935.057	86	6353.9	12632.6
2313.69	3407		2412.92	9761	6709.9	9138.74	3412.42	15786.7	9691.79	902.82	922.375	85.684	6309.5	12550.4
2315.94	3438		2415.39	9681	6739.05	9216.32	3444.26	15891.3	9692.24	895.951	931.802	77.632	6265.76	12500.1
2318.2	3396		2417.85	9672	6695.11	9060.37	3407.05	15695	9643.42	893.906	935.857	78.368	6268.47	12471.5
2320.45	3395		2420.32	9683	6650.32	9094.74	3384.95	15729.7	9628.9	902.459	916.927	82.158	6285.12	12447.1
2322.71	3392		2422.78	9596	6703.63	9078.95	3408.53	15680	9604.44	898.482	905.665	80.737	6249.08	12406.7
2324.96	3421		2425.24	9587	6684.53	9051.68	3380	15635.5	9627.69	891.884	919.729	78.632	6190.59	12368.4
2327.22	3447		2427.7	9505	6614.74	8988.9	3359.26	15500	9614.79	888.906	924.564	82.211	6185.91	12333.4
2329.47	3379		2430.17	9374	6606.26	8993.79	3356.63	15493.6	9605.42	893.188	907.924	79.684	6220.37	12366.6
2331.72	3419		2432.63	9590	6652.84	9007.53	3385.26	15521.5	9573.31	891.092	906.786	79.579	6200.44	12322.4
2333.97	3332		2435.1	9404	6624.89	9024.63	3377.95	15514.5	9541.33	882.995	910.409	77.211	6170.01	12283.9
2336.22	3390		2437.56	9472	6639.11	8976.26	3384.68	15477.9	9555.69	887.76	900.222	78.895	6166.07	12289.2
2338.47	3401		2440.02	9427	6572.63	8886.68	3342.37	15347.4	9521.44	899.223	894.217	79.789	6194.44	12269.4
2340.72	3397		2442.49	9449	6628.1	9007.21	3381.84	15459.7	9460.08	901.005	898.603	77.737	6172.38	12227.7
2342.97	3475		2444.95	9334	6558.84	8923.68	3359.26	15332.5	9423.59	889.468	896.894	79.737	6095.51	12136.5
2345.22	3496		2447.41	9482	6635.05	9072.63	3395.58	15514.6	9380.42	877.323	887.212	80.526	6099.96	12087.7
2347.47	3494		2449.88	9342	6547.53	8910.68	3341.79	15355.5	9379.55	879.943	887.72	75.684	6090.03	12090.7
2349.72	3470		2452.34	9249	6540.47	8876.63	3320.26	15299.8	9339.49	872.861	883.577	79.105	6041.14	12039.8
2351.96	3373		2454.8	9139	6510.21	8926.53	3341.16	15296.5	9274.67	855.278	871.369	82.263	6006.3	11948
2354.21	3360		2457.27	9192	6565.74	8938.32	3361.84	15318.6	9402.5	872.382	882.809	81.789	6042.69	11995.8
2356.45	3414		2459.73	9158	6505.68	8907.1	3340.63	15302.8	9406.32	875.909	887.803	79.947	6079.68	12022.7
2358.7	3480		2462.2	9107	6464.42	8779.84	3291.21	15105.6	9244.79	857.463	861.082	81.789	6001.76	11864.5
2360.94	3448		2464.66	9218	6511.74	8888.53	3323.11	15229.2	9279.39	862.423	880.111	82.474	5999.56	11896
2363.18	3566		2467.12	9005	6444.21	8733.1	3279.1	15000.8	9302.42	867.306	883.223	84.789	6008.83	11922.7
2365.42	3495		2469.59	8934	6382	8724.37	3283.42	15005.4	9192.1	858.565	858.45	82.421	5941.54	11775.6
2367.67	3491		2472.05	9002	6478.63	8814.53	3313.16	15121.8	9205.44	878.243	841.496	81.579	5944.97	11807.4
2369.91	3509		2474.51	9105	6495.11	8840.84	3344.58	15139.9	9273.75	868.958	869.302	81.211	5992.22	11834.1
2372.15	3604		2476.98	9046	6481.1	8785.68	3306.53	14973.1	9093.66	848.047	842.758	81.737	5893.83	11681.1
2374.39	3535		2479.44	8899	6434.9	8772.84	3292.95	14971.6	9271.17	867.963	855.082	80.789	5980.08	11797.3
2376.63	3514		2481.9	8957	6463.68	8765.63	3324.79	15003.9	9126.72	840.953	838.551	78.789	5822.78	11629.1
2378.86	3477		2484.37	8854	6415.32	8781.26	3318.95	15058.1	9116.76	851.512	857.014	81.158	5864.73	11632.7
2381.1	3547		2486.83	8943	6503.84	8865.68	3340.53	15118.7	9142.3	856.059	847.448	78.579	5900.5	11682.8
2383.34	3564		2489.29	9081	6521.63	8932.42	3370.79	15243.7	9062.97	861.999	848.7	81.947	5869.29	11558.1
2385.57	3577		2491.76	9015	6507.63	8904.16	3367.89	15172.6	9146.55	858.336	848.006	82.421	5922.95	11625.2
2387.81	3611		2494.22	8954	6515.63	8979.53	3350.47	15228.3	9000.65	857.397	845.229	82.632	5830.04	11484.5
2390.05	3664		2496.68	8888	6448.37	8849.9	3324.95	15084.6	9119.72	860	847.077	83.684	5901.34	11657.4
2392.28	3603		2499.15	8996	6482.53	8922.63	3377.26	15143.3	9066.04	865.265	846.667	84.842	5865.18	11555.2
2394.51	3581		2501.61	8894	6432.26	8866.37	3356.58	15073	9043.97	852.543	828.338	82.789	5833.74	11503.2
2396.75	3635		2504.08	8922	6497	8878.74	3350.21	15144.3	8970.77	856.884	830.861	84.053	5806.16	11465.6
2398.98	3616		2506.54	8961	6484	8933.9	3372.11	15211	8948.33	845.2	833.237	88.211	5809.97	11453.7
2401.21	3749		2509	8835	6508.84	8937.74	3393.16	15160.8	8992.08	847.258	838.703	92.158	5818.12	11485.8
2403.44	3759		2511.47	8814	6468.74	8886.58	3371.95	15098.6	8928	846.883	822.924	93.053	5758.41	11337.3
2405.67	3739		2513.93	8712	6393.53	8793.16	3335.63	14921	8900.62	844.466	814.965	90.158	5751.09	11325.9
2407.9	3769		2516.39	8833	6518.53	8935.26	3398.21	15140.2	8916.38	837.42	818.809	92.368	5731.06	11316.5
2410.13	3855		2518.86	8745	6424.26	8878.58	3320.53	15003.1	8893.89	832.421	820.971	87.579	5691.21	11267.3
2412.36	3820		2521.32	8638	6470.89	8892.47	3361.37	15037.2	8930.34	835.121	820.499	89.684	5700.41	11303.1
2414.59	3875		2523.78	8770	6432.21	8813.63	3350.32	14971.6	8887.44	839.004	813.139	88.158	5707.25	11260.7
2416.81	3994		2526.25	8589	6354.11	8722.95	3329	14777.8	8833.16	829.538	800.445	86.737	5693.41	11186.9
2419.04	4014		2528.71	8733	6501.63	8929.79	3372.58	15086.4	8840.36	822.201	799.139	86.105	5702.73	11171.1
2421.27	4057		2531.18	8631	6389.1	8805.32	3336.95	14865.8	8802.28	828.718	797.771	83.421	5710.02	11166.5
2423.49	4280		2533.64	8636	6363.95	8783.74	3327.47	14827	8829.29	835.785	792.891	85	5695.04	11180.7
2425.71	4403		2536.1	8555	6449.74	8901.68	3366.16	14978.4	8828.51	830.292	792.931	87.632	5639.23	11109
2427.94	4541		2538.57	8568	6426.9	8813.32	3354.89	14885.1	8747.88	814.096	789.833	87	5592.13	11026.1
2430.16	4793		2541.03	8534	6382.74	8828.84	3329.9	14862.3	8785.2	820.11	802.407	89.053	5642.78	11060.5
2432.38	5098		2543.49	8676	6373.63	8829.21	3349.79	14854	8776.18	826.172	799.772	86.947	5637.4	11053.4
2434.61	5356		2545.96	8457	6306.53	8723.84	3310.84	14701.3	8780.09	823.299	792.632	88.368	5617.87	11042.7
2436.83	5584		2548.42	8543	6390.21	8829.63	3381.11	14861.6	8698.15	826.516	786.474	91.842	5574.32	10939.5
2439.05	5886		2550.88	8479	6380.16	8815.74	3359.21	14823.3	8681.85	835.429	775.572	92.737	5583.51	10946.9
2441.27	5988		2553.35	8245	6309.58	8641.74	3324.37	14574	8672.88	814.552	783.981	92.211	5537.01	10911.3
2443.49	5942		2555.81	8432	6354.42	8758	3350.42	14736.2	8656.77	823.644	781.837	94.632	5602.18	10901.9
2445.71	5866		2558.27	8256	6358.42	8725.95	3337.95	14670.6	8652.66	813.79	761.909	97.684	5515.03	10868.5
2447.92	5598		2560.74	8341	6353.21	8778.79	3339.89	14696.5	8645.97	806.351	764.357	97.211	5527.91	10810.5
2450.14	5357		2563.2	8426	6393.84	8772	3370.68	14738.8	8643.52	807.528	772.005	97.368	5551.4	10812.1
2452.36	4991		2565.66	8225	6336.84	8753.74	3337.68	14664	8517.1	799.432	772.575	96.211	5518	10742.7
2454.57	4802		2568.13	8249	6314.05	8691.37	3329.26	14553.8	8577.11	818.561	758.677	100.474	5450.67	10743
2456.79	4763		2570.59	8287	6347.42	8813.1	3363.79	14741.6	8521.58	797.385	746.252	104.368	5457.23	10695.8
2459	4586		2573.05	8272	6304.53	8724.53	3332.21	14588	8522.85	809.62	762.497	102.368	5548.65	10723.3
2461.22	4407		2575.52	8179	6329.95	8779.26	3344.05	14653	8515.24	811.989	751.482	101	5426.64	10640.5
2463.43	4344		2577.98	8229	6294.47	8680.42	3325.74	14542.4	8491.5	825.933	754.233	98.263	5440.49	10668.2
2465.64	4305		2580.45	7989	6288.05	8691.58	3338.84	14493.3	8463.7	803.566	745.783	96.158	5420.99	10577.1
2467.86	4153		2582.91	7923	6233.16	8618.42	3281.89	14439.2	8486.22	811.915	757.554	93.263	5388.18	10609.4
2470.07	4164		2585.37	8065	6329.79	8770.1	3359.05	14572.8	8442.2	794.461	756.154	92.158	5372.65	10550.3
2472.28	4244		2587.84	8177	6234.53	8600.05	3319.42	14357.3	8372.6	789.931	735.883	86.684	5354.43	10469
2474.49	4169		2590.3	8017	6241.21	8631.58	3310.21	14408.6	8442.35	787.794	740.858	86.947	5374.37	10544.8
2476.7	4080		2592.76	8028	6218.79	8573	3304.68	14366.8	8394.44	789.719	744.915	89.474	5336.14	10494.2
2478.91	4078		2595.23	8043	6265.89	8633.1	3339.42	14379.8	8387.13	805.056	745.734	83.789	5364.25	10473.7
2481.11	3955		2597.69	7931	6237.68	8611.21	3329.37	14331.7	8292.05	793.487	738.339	83.632	5282.2	10348.5
2483.32	4080		2600.15	7977	6228.42	8672.74	3319.63	14372.6	8226.77	790.474	725.977	83.211	5260.79	10282.1
2485.53	4109		2602.62	7940	6224.05	8626.42	3318.05	14329.4	8300.72	787.247	724.919	81.737	5287.95	10324.5
2487.74	4037		2605.08	7814	6197.32	8609.32	3302.42	14300.5	8298.14	789.399	720.11	83.421	5282.36	10301
2489.94	4075		2607.55	7938	6236	8615.74	3325.11	14332.4	8345.77	804.756	721.928	81.105	5323.39	10362.4
2492.15	4100		2610.01	7891	6214.26	8645.47	3322.26	14309.6	8304.8	798.784	716.593	80.421	5339.25	10324.7
2494.35	4101		2612.47	7874	6246.58	8689.84	3329.21	14363.1	8224.53	786.994	711.824	80.789	5289.26	10233.3
2496.55	4130		2614.94	7880	6218.47	8596.42	3321	14243.7	8261.21	789.832	722.219	85.579	5290.36	10279.8
2498.76	4101		2617.4	7809	6227.84	8591.53	3326.89	14207.6	8221.61	791.886	720.764	81.368	5293.56	10215.8
2500.96	4015		2619.86	7781	6235.21	8645.37	3339.11	14317.6	8164.29	798.492	712.481	81.789	5262.44	10130.4
2503.16	4042		2622.33	7742	6179.63	8582.16	3321.37	14235.2	8167.64	800.781	716.786	78.105	5243.43	10160
2505.36	4106		2624.79	7777	6182.84	8529.95	3316.32	14135.7	8134.63	786.214	717.801	79.368	5219.7	10115.7
2507.56	4146		2627.25	7755	6207.37	8626	3333.74	14232.4	8163.11	780.747	710.526	81.947	5215.75	10109.3
2509.76	4054		2629.72	7533	6091.26	8455.1	3259.95	13954.7	8157.16	779.549	698.846	76.947	5190.24	10074.3
2511.96	4081		2632.18	7672	6221.37	8702.37	3349.89	14273.9	8120.65	772.492	694.15	82.632	5170.08	10006.2
2514.16	4083		2634.64	7533	6098.74	8443.37	3278.95	13947.4	8078.47	771.544	695.593	83.737	5153.89	9985.89
2516.36	3984		2637.11	7615	6161.42	8596.05	3334.05	14179.3	8003.49	766.337	687.472	81.895	5135.63	9901.47
2518.55	3973		2639.57	7495	6119.58	8506.63	3280.05	14001.9	8051.48	768.264	686.799	79.211	5130.41	9936.83
2520.75	4003		2642.03	7599	6153.63	8555.1	3316.32	14057.6	8010.17	760.454	684.107	79.789	5085.9	9887.01
2522.95	4017		2644.5	7416	6070.84	8436.05	3265.37	13977	7949.33	763.132	686.524	79	5072.52	9858.12
2525.14	4197		2646.96	7467	6088.05	8488.9	3305.26	13964.5	7939.4	765.231	675.546	83.211	5085.7	9795.54
2527.34	4213		2649.43	7397	6007.16	8363.05	3234.37	13763	7892.45	768.28	673.805	83.579	5061.77	9747.42
2529.53	4163		2651.89	7525	6118.1	8480.32	3303.89	14036.3	7949.96	775.212	677.261	83.368	5082.28	9781.2
2531.72	4072		2654.35	7391	6070.84	8374.26	3261.42	13740.4	7952.44	767.514	682.897	81.053	5083.09	9794.45
2533.92	4158		2656.82	7402	6102.68	8479.16	3294.74	13925.1	7935.73	740.818	669.773	88	4998.72	9699.14
2536.11	4084		2659.28	7386	6037.11	8420.95	3278.84	13795.4	7749.85	734.794	658.59	87.158	4906.6	9505.94
2538.3	4096		2661.74	7428	6075.79	8446.1	3299	13889.2	7861.02	744.518	679.441	82.526	4978.81	9588.37
2540.49	3988		2664.21	7277	6032.58	8426.9	3268.11	13783.4	7899.54	761.707	671.588	85.684	5005.12	9660.26
2542.68	3997		2666.67	7232	6025.16	8386.58	3256.53	13731.3	7872.97	759.604	659.474	87.105	5047.14	9647.07
2544.87	4121		2669.13	7352	6147.47	8558.9	3335.37	14025.7	7793.12	747.65	671.711	86.789	4956.3	9574.39
2547.06	4158		2671.6	7230	6050.53	8383.16	3288	13780.9	7808.22	745.743	667.58	92.421	4939.36	9559.56
2549.25	4134		2674.06	7273	6061.68	8431.79	3276.63	13825.6	7831.98	756.532	666.945	96.684	4973.81	9599.88
2551.44	4045		2676.52	7233	6049.37	8438	3291.32	13765.8	7722.44	745.921	650.305	104.158	4941.78	9489.1
2553.62	4010		2678.99	7215	6006.11	8404.74	3258.21	13713.4	7775.4	751.301	666.887	116.632	4929.57	9495.42
2555.81	3937		2681.45	7280	6032.16	8394.37	3274.84	13762.4	7872.89	751.576	668.821	128	4984.61	9589.75
2558	3984		2683.91	7048	5985.79	8322.42	3237.89	13633.6	7749.27	742.592	645.163	138.737	4905.32	9448.59
2560.18	4064		2686.38	7087	5995.58	8361.74	3252.89	13669.5	7687.57	752.621	645.58	144.684	4933.11	9421.72
2562.36	3974		2688.84	7086	6064.32	8445.68	3299.68	13811.4	7673.32	740.475	650.56	158	4908.53	9404.95
2564.55	3977		2691.31	7061	5998.58	8380.05	3276.05	13661.4	7695.48	747.647	651.182	154.842	4896.46	9391.88
2566.73	3946		2693.77	6941	5972.89	8343.37	3238.95	13582.7	7647.77	735.601	645.147	160.053	4885.37	9312.19
2568.91	3985		2696.23	7107	6065.53	8448.63	3304.74	13795.7	7607.54	730.986	640.29	161.474	4844.9	9270.95
2571.1	4010		2698.7	6949	5962.21	8319.53	3244.89	13534.7	7604.24	734.02	645.081	153.158	4839.42	9264.48
2573.28	4081		2701.16	7063	5937.74	8335.63	3254.84	13571.7	7641.27	725.94	635.097	151.158	4854.59	9254.01
2575.46	3984		2703.62	6981	5968.47	8325.74	3264	13607	7649.54	731.464	624.179	147.947	4844.03	9256.03
2577.64	4020		2706.09	7067	5986.74	8446.68	3274.79	13665.6	7614.98	736.654	623.721	151.526	4804.8	9225.34
2579.82	3980		2708.55	7054	5972.47	8359.53	3276.26	13540.7	7576.37	730.341	627.712	151.842	4778.29	9186.52
2582	4027		2711.01	6944	5881.74	8276.26	3219.47	13419.4	7514.2	728.966	630.508	151.737	4759.58	9121.63
2584.17	4063		2713.48	7030	5974.42	8336	3234.26	13488.6	7514.08	728.349	626.045	156.895	4756.49	9075.99
2586.35	4103		2715.94	6928	5921.58	8332.26	3258.16	13539.3	7543.35	729.173	626.075	153.211	4773.34	9121.34
2588.53	4075		2718.41	6804	5896.95	8322.53	3242	13484.8	7483.47	727.903	618.881	156.474	4738.73	9079.71
2590.7	4071		2720.87	6839	5934.74	8288.42	3243.68	13444.8	7460.47	725.373	619.223	158.421	4742.42	9041.41
2592.88	4037		2723.33	6832	5927.32	8277.05	3252.53	13427.8	7462	727.413	620.06	155.737	4727.82	9033.73
2595.06	3942		2725.8	6813	5932.05	8355.26	3248.53	13488.7	7419.14	724.618	615.895	159.053	4728.76	9021.62
2597.23	4051		2728.26	6755	5917.74	8237.84	3239.74	13389.3	7414.06	719.694	626.186	156.526	4743.37	8989.96
2599.4	3997		2730.72	6891	5903.95	8278.63	3215.58	13426	7523.4	725.052	637.807	159.474	4762.97	9089.93
2601.58	4074		2733.19	6692	5911.58	8312.84	3215.47	13440.3	7393.78	706.176	617.187	160.263	4673.96	8929.41
2603.75	3973		2735.65	6650	5862.58	8228.32	3202.21	13292.4	7366.79	713.26	605.59	163.684	4685.21	8904.53
2605.92	4058		2738.11	6770	5908.32	8322.74	3222.89	13478.5	7403.9	726.512	606.989	162.211	4702.35	8934.81
2608.09	4089		2740.58	6681	5864.05	8228.1	3216.74	13307.3	7291.29	715.271	601.977	161.526	4645.71	8828.17
2610.26	4013		2743.04	6730	5857.58	8232.9	3218.84	13321	7361.85	715.744	611.595	163.895	4676.92	8903.38
2612.43	4072		2745.5	6632	5872.37	8292.79	3221.89	13368	7332.98	715.11	605.531	165.895	4612.08	8818.32
2614.6	4092		2747.97	6617	5813.32	8211.26	3180.58	13226.6	7360.22	711.801	611.126	167.474	4671.95	8867.7
2616.77	4094		2750.43	6659	5800.68	8167.26	3185.63	13178.3	7203.45	696.351	594.164	167.421	4573	8697.11
2618.94	4112		2752.89	6669	5860.63	8258	3202	13326.4	7248.58	699.38	604.446	164.947	4651.3	8759.8
2621.1	4177		2755.36	6608	5843.74	8220.53	3215.42	13259.8	7215.54	694.43	598.849	161.474	4580.54	8731.46
2623.27	4169		2757.82	6651	5803.1	8236.21	3202.42	13251.5	7224.09	697.381	602.212	150.789	4613.63	8684.38
2625.44	4144		2760.28	6276	5765.9	8145.47	3169.58	13123.3	7161.65	695.754	594.282	146.158	4574.02	8583.39
2627.6	4029		2762.75	6573	5818.84	8236.95	3199.21	13204	7194.34	703.749	599.065	147.632	4540.38	8609.81
2629.77	4134		2765.21	6540	5820.84	8217.26	3184.74	13201.2	7185.67	703.259	594.45	150.316	4548.44	8614.41
2631.93	4156		2767.68	6414	5730.74	8073.42	3135.74	13032.3	7197.2	705.131	586.4	155.684	4569.34	8619.14
2634.1	4167		2770.14	6565	5848.16	8308.74	3223.95	13277.5	7128.65	698.213	583.043	171.789	4528.86	8523.86
2636.26	4231		2772.6	6453	5741.21	8053.95	3149.47	12979.5	7134.13	697.884	590.736	182	4511.52	8540.1
2638.42	4264		2775.07	6424	5779.16	8144.95	3181.47	13113.5	7135.15	705.916	588.789	207.368	4532.07	8542.44
2640.58	4211		2777.53	6285	5717.1	8084.84	3151	12959.9	7136.16	701.515	582.325	231.263	4523.91	8504.48
2642.74	4209		2779.99	6458	5837.58	8273.32	3205.16	13281.2	7110.66	687.046	587.619	260.789	4512.11	8486.97
2644.9	4227		2782.46	6385	5716.47	8133.63	3160.1	13045.3	7078.36	680.355	583.697	287.895	4491.24	8432.01
2647.06	4235		2784.92	6266	5722.63	8033.9	3119.42	12963.8	7069.33	685.666	573.855	294	4455.43	8406.69
2649.22	4218		2787.38	6415	5811.16	8255	3214.89	13229	7057.45	693.045	566.942	310.632	4465.34	8395.91
2651.38	4230		2789.85	6212	5677.63	8034.26	3134	12890	7023.11	689.419	568.09	299.421	4434.88	8361.42
2653.54	4237		2792.31	6362	5741.21	8125.84	3165.74	12978	6990.72	682.816	566.595	308.158	4407.12	8326.26
2655.7	4200		2794.78	6231	5729.32	8054.1	3155.26	12910	7023.36	696.016	561.675	318.947	4419.05	8347.89
2657.85	4313		2797.24	6329	5748.84	8152.21	3177.95	13015	7004.32	694.305	562.148	350.158	4401.83	8323.94
2660.01	4349		2799.7	6304	5678.58	8028.26	3096.89	12826.2	6945.97	679.578	564.51	357.789	4393.61	8266.62
2662.16	4299		2802.17	6170	5692.21	8047.37	3145.32	12916.5	6944.82	685.153	556.274	369.105	4387.57	8268.52
2664.32	4366		2804.63	6241	5687.74	8111	3149.42	12915.5	6912.74	681.985	552.487	392	4388.86	8231.54
2666.47	4416		2807.09	6121	5607.37	7959.42	3097.79	12752	6910.45	679.566	564.996	409.684	4405.52	8208.99
2668.63	4354		2809.56	6234	5671.42	8111.84	3140.89	12893.6	6869.72	674.701	554.407	436.579	4366.3	8173.16
2670.78	4347		2812.02	6168	5627.84	7992.95	3120.42	12747.3	6878.55	677.481	559.481	457.263	4368.24	8171.08
2672.93	4405		2814.48	6208	5710.26	8126.05	3176.89	13025.1	6869.17	670.244	551.372	496.316	4325.52	8111.44
2675.08	4530		2816.95	6167	5619.84	7989.69	3116	12735.8	6918.12	678.411	556.555	506	4348.02	8178.75
2677.23	4421		2819.41	6008	5607.84	7907.69	3069.68	12671.1	6815.02	682.343	554.988	524.895	4295.75	8099.08
2679.38	4517		2821.87	6035	5639.42	8015.05	3137.16	12766.7	6854.3	677.928	556.014	542.368	4327.39	8102.35
2681.53	4405		2824.34	6091	5652.32	8044.21	3141.53	12806.9	6854.15	670.33	550.456	565.895	4337.43	8051.36
2683.68	4375		2826.8	5910	5513.16	7825.9	3022.84	12503.3	6782.57	665.372	558.68	577.474	4263.71	8008.27
2685.83	4499		2829.26	5977	5622.63	7975.95	3108.05	12702.5	6783.87	671.086	547.727	612.105	4316.71	8038.69
2687.98	4507		2831.73	6001	5578.21	7950.42	3101.95	12670	6758.82	668.233	543.092	618.105	4312.38	8011.75
2690.13	4467		2834.19	5894	5594.95	7986.74	3117.37	12648.3	6686.74	662.537	546.029	629.684	4224.14	7888.87
2692.27	4510		2836.66	5933	5606.1	7984.9	3110.47	12714.1	6787.09	676.022	546.68	621.947	4317.4	7965.33
2694.42	4598		2839.12	5936	5528.16	7919.9	3072.05	12548.5	6659.33	644.138	536.628	634.895	4255.64	7861.04
2696.57	4603		2841.58	5884	5579.63	7971.16	3092.79	12610.3	6747.65	658.293	544.82	636.526	4286.46	7949.15
2698.71	4496		2844.05	5857	5536.47	7930.21	3078.21	12570.8	6674.68	660.853	543.678	626.211	4245.14	7912.07
2700.85	4496		2846.51	5698	5524.05	7857.68	3066	12482	6636.58	656.603	535.162	636	4242.65	7831.75
2703	4427		2848.97	5849	5551.42	7889.21	3069	12552.9	6628.84	647.301	532.673	630.316	4245.58	7788.76
2705.14	4356		2851.44	5908	5620.74	8027.1	3123.53	12740.9	6680.81	667.937	541.631	638.474	4295.15	7865.42
2707.28	4337		2853.9	5793	5485.32	7835.79	3056.95	12425.6	6530.07	655.317	539.888	616.368	4214.91	7709.59
2709.42	4460		2856.36	5841	5502.68	7870.74	3050.79	12460.5	6527.88	642.883	534.468	612.421	4223.92	7680.79
2711.57	4770		2858.83	5785	5498.26	7880.42	3054.74	12508.8	6533.96	651.033	526.04	626.053	4218.82	7703.19
2713.71	4736		2861.29	5760	5512.95	7878.63	3078.84	12482.3	6555.08	652.052	529.562	624.526	4206.87	7686.72
2715.85	4738		2863.75	5670	5454.37	7814.26	3045.84	12376.4	6530.44	650.674	530.021	631.158	4225.15	7649.25
2717.99	4712		2866.22	5740	5492.21	7831.37	3044.11	12381.2	6539.14	651.198	527.075	642.211	4261.95	7647.36
2720.12	4676		2868.68	5718	5475.26	7867.05	3045.16	12431.5	6526.3	646.571	524.122	672.526	4275.41	7640.95
2722.26	4695		2871.14	5663	5448.95	7806.63	3036.47	12329.7	6492.92	647.277	517.026	723.789	4232.88	7598.41
2724.4	4731		2873.61	5617	5488	7839.58	3052.11	12409.7	6490.91	643.45	511.945	772.947	4231.98	7575.76
2726.54	4702		2876.07	5613	5457	7805.37	3047.53	12342.5	6493.26	643.855	515.033	804.474	4259.91	7566.27
2728.67	4638		2878.54	5703	5477.21	7825.53	3046.68	12338.6	6488.12	646.623	520.868	841.947	4250.99	7545.75
2730.81	4780		2881	5510	5381.37	7730.63	3024.05	12209.2	6464.89	640.54	520.38	866.421	4226.15	7521.54
2732.94	4715		2883.46	5585	5449.95	7768.74	3025.68	12257.2	6437.38	634.684	518.635	919.263	4213.11	7501.4
2735.08	4798		2885.93	5565	5497	7853.74	3066.47	12368.4	6398.56	636.949	512.013	942.053	4200.04	7481.03
2737.21	4772		2888.39	5390	5390.32	7765.1	3020.95	12189.4	6388	643.334	502.841	936.526	4196.14	7476.11
2739.34	4734		2890.85	5586	5397.74	7776.69	3018.42	12233.8	6416.89	645.594	508.441	927.842	4207.91	7481.79
2741.48	4616		2893.32	5523	5436.05	7772.95	3002.42	12242	6416.73	639.889	516.723	900.421	4194.79	7471.35
2743.61	4697		2895.78	5364	5389.32	7731.9	3012.16	12145.6	6418.18	641.622	515.022	870	4182.26	7466.6
2745.74	4703		2898.24	5426	5273.84	7596.9	2964.95	11915	6382.99	646.614	509.788	816.105	4194.15	7435.11
2747.87	4722		2900.71	5536	5394.32	7717.42	3001.58	12131.8	6362.63	629.789	503.236	801.632	4154.34	7370.97
2750	4716		2903.17	5413	5381.42	7744.9	3006.21	12128.8	6338.24	632.99	501.314	780.474	4152.46	7363.11
2752.13	4790		2905.64	5458	5410.32	7780.32	3029.79	12206.6	6358.23	634.119	501.014	769.368	4182.78	7393.38
2754.26	4742		2908.1	5465	5306.16	7653.63	2974.42	12018.2	6281.21	623.529	493.042	729.579	4153.45	7317.95
2756.39	4755		2910.56	5334	5358.42	7689.05	2998.26	12093.2	6245.64	622.581	494.814	672.316	4230.35	7313.08
2758.51	4715		2913.03	5355	5358.58	7661	2963.58	12019.5	6286.93	621.293	504.449	624.263	4228.39	7301.19
2760.64	4716		2915.49	5409	5390.16	7773.21	3039.95	12149	6246.61	624.516	505.049	572.421	4225.48	7273.75
2762.77	4659		2917.95	5370	5260.68	7593.79	2958.74	11942	6208.2	623.247	494.689	507.579	4210.06	7220.87
2764.89	4681		2920.42	5308	5347.42	7706.32	3009.16	12041.9	6196.34	627.37	483.089	463.263	4214.73	7162.42
2767.02	4746		2922.88	5355	5326.05	7680.16	2966	11999	6196.32	610.262	491.621	419.526	4211.06	7187
2769.14	4686		2925.34	5406	5330.95	7674.84	2998.32	12039	6262.76	618.95	488.011	373.842	4288.21	7246.83
2771.26	4849		2927.81	5212	5232.21	7565.21	2931.95	11867.8	6253.46	623.272	488.767	354.368	4321.52	7249.21
2773.39	4771		2930.27	5220	5301.79	7623.68	2966.37	11897.2	6192.44	622.375	476.322	358.316	4222.59	7156.17
2775.51	4799		2932.73	5232	5272.68	7653.9	2963.74	11916.2	6164.64	604.749	496.671	361.842	4275.02	7147.16
2777.63	4846		2935.2	5280	5299.58	7652.16	2969.84	11942.2	6182.35	609.366	488.988	366.632	4276.77	7122.03
2779.75	4870		2937.66	5221	5280.63	7627.47	2968.74	11902.3	6203.99	612.82	483.624	379	4219.17	7093.97
2781.87	4870		2940.12	5151	5253.47	7607.68	2952.16	11852.4	6126.69	612.562	468.96	376.421	4218.63	7054.85
2783.99	4841		2942.59	5223	5243.26	7560.74	2965.11	11799.6	6106.32	608.344	468.267	375.684	4185.56	7018.94
2786.11	4833		2945.05	5145	5206.89	7527.42	2903.21	11750.8	6123.23	614.84	473.597	370.053	4148.88	7007.34
2788.23	4797		2947.51	5151	5230.79	7560.1	2929.58	11810.4	6128	616.778	474.889	359.053	4141.25	7006
2790.35	4771
2792.47	4781
2794.59	4938
2796.7	4934
2798.82	4901
2800.93	4893
2803.05	4843
2805.16	4928
2807.28	4984
2809.39	4999
2811.5	4886
2813.61	4833
2815.72	4973
2817.83	5032
2819.94	5109
2822.05	5064
2824.16	5030
2826.27	5108
2828.38	5297
2830.48	5289
2832.59	5214
2834.69	5323
2836.8	5518
2838.9	5547
2841.01	5646
2843.11	5795
2845.21	6053
2847.32	6195
2849.42	6372
2851.52	6713
2853.62	6900
2855.72	6788
2857.82	6904
2859.91	7105
2862.01	7624
2864.11	8010
2866.21	8279
2868.3	8456
2870.4	8731
2872.49	8921
2874.58	9029
2876.68	9381
2878.77	9185
2880.86	9043
2882.96	9209
2885.05	8972
2887.14	8938
2889.23	9087
2891.32	9332
2893.4	9378
2895.49	9714
2897.58	9640
2899.67	9817
2901.75	10276
2903.84	10407
2905.92	10596
2908.01	11102
2910.09	11266
2912.18	11548
2914.26	12260
2916.34	12836
2918.42	12949
2920.5	13160
2922.58	13723
2924.66	13674
2926.74	13935
2928.82	13932
2930.9	14245
2932.98	14519
2935.05	14519
2937.13	14311
2939.2	14299
2941.28	13620
2943.35	12920
2945.43	12448
2947.5	12416
2949.57	12127
2951.64	11748
2953.72	11258
2955.79	10937
2957.86	10837
2959.93	10589
2962	10681
2964.06	10331
2966.13	10320
2968.2	10096
2970.27	9829
2972.33	9741
2974.4	9695
2976.46	9526
2978.53	9255
2980.59	9211
2982.65	9058
2984.72	8763
2986.78	8481
2988.84	8354
2990.9	8160
2992.96	7917
2995.02	7530
2997.08	7573
2999.14	7275
3001.19	7046
3003.25	6990
3005.31	6741
3007.36	6687
3009.42	6361
3011.47	6292
3013.53	6292
3015.58	6349
3017.64	6176
3019.69	6016
3021.74	6138
3023.79	5988
3025.84	5855
3027.89	5831
3029.94	5819
3031.99	5906
3034.04	5997
3036.09	5925
3038.14	5892
3040.18	6011
3042.23	6070
3044.27	6046
3046.32	5983
3048.36	6094
3050.41	6194
3052.45	6262
3054.49	6221
3056.53	6409
3058.58	6389
3060.62	6354
3062.66	6418
3064.7	6193
3066.74	6248
3068.77	6184
3070.81	5992
3072.85	5958
3074.89	5854
3076.92	5613
3078.96	5672
3080.99	5621
3083.03	5548
3085.06	5576
3087.1	5591
3089.13	5589
3091.16	5427
3093.19	5426
3095.22	5520
3097.25	5536
3099.28	5606
3101.31	5421
3103.34	5444
3105.37	5479
3107.4	5413
3109.43	5487
3111.45	5473
3113.48	5439
3115.5	5447
3117.53	5491
3119.55	5570
3121.58	5520
3123.6	5625
3125.62	5602
3127.64	5483
3129.66	5516
3131.68	5482
3133.7	5499
3135.72	5551
3137.74	5503
3139.76	5389
3141.78	5551
3143.8	5620
3145.81	5731
3147.83	5642
3149.85	5595
3151.86	5534
3153.87	5542
3155.89	5443
3157.9	5479
3159.91	5546
3161.93	5542
3163.94	5505
3165.95	5534
3167.96	5557
3169.97	5640
3171.98	5595
3173.99	5542
3176	5595
3178	5591
3180.01	5517
3182.02	5515
3184.02	5532
3186.03	5458
3188.03	5488
3190.04	5653
3192.04	5558
3194.04	5597
3196.05	5708
3198.05	5580
3200.05	5617
3202.05	5692
3204.05	5573
3206.05	5674
3208.05	5791
3210.05	5648
3212.05	5602
3214.04	5680
3216.04	5733
3218.04	5830
3220.03	5712
3222.03	5699
3224.02	5795
3226.02	5918
3228.01	5796
3230	5792
3232	5887
3233.99	5960
3235.98	5973
3237.97	5881
3239.96	6009
3241.95	5986
3243.94	5966
3245.93	5963
3247.92	6009
3249.9	5938
3251.89	5945
3253.88	6044
3255.86	6073
3257.85	5929
3259.83	6023
3261.81	5953
3263.8	5886
3265.78	6016
3267.76	5963
3269.75	6015
3271.73	6036
3273.71	6046
3275.69	5900
3277.67	6113
3279.65	6133
3281.62	6011
3283.6	5776
3285.58	6026
3287.56	6059
3289.53	6292
3291.51	5969
3293.48	5841
3295.46	6007
3297.43	5960
3299.41	5883
3301.38	5831
3303.35	5881
3305.32	6048
3307.29	5985
3309.26	5892
3311.23	6051
3313.2	6081
3315.17	5992
3317.14	6042
3319.11	6114
3321.08	6039
3323.04	6101
3325.01	5990
3326.98	6027
3328.94	6099
3330.9	6007
3332.87	5803
3334.83	5999
3336.8	5974
3338.76	5888
3340.72	5837
3342.68	5957
3344.64	5885
3346.6	6106
3348.56	5936
3350.52	5746
3352.48	5939
3354.44	5950
3356.39	5834
3358.35	5720
3360.31	5717
3362.26	5756
3364.22	5854
3366.17	5823
3368.13	5658
3370.08	5886
3372.03	5966
3373.99	5808
3375.94	5758
3377.89	5772
3379.84	5775
3381.79	5769
3383.74	5728
3385.69	5681
3387.64	5924
3389.59	5667
3391.54	5577
3393.48	5709
3395.43	5711
3397.37	5626
3399.32	5503
3401.27	5527
3403.21	5619
3405.15	5761
3407.1	5686
3409.04	5631
3410.98	5850
3412.92	5677
3414.86	5703
3416.81	5721
3418.75	5584
3420.68	5557
3422.62	5671
3424.56	5708
3426.5	5550
3428.44	5565
3430.37	5512
3432.31	5493
3434.25	5666
3436.18	5661
3438.12	5442
3440.05	5479
3441.98	5336
3443.92	5322
3445.85	5368
3447.78	5488
3449.71	5403
3451.64	5415
3453.57	5463
3455.5	5487
3457.43	5446
3459.36	5467
3461.29	5359
3463.22	5384
3465.14	5487
3467.07	5452
3469	5419
3470.92	5326
3472.85	5201
3474.77	5235
3476.7	5233
3478.62	5303
3480.54	5229
3482.46	5276
3484.39	5288
3486.31	5374
3488.23	5052
3490.15	5049
3492.07	5235
3493.99	5128
3495.91	4964
3497.82	4940
3499.74	4993
3501.66	4987
3503.57	5045
3505.49	4800
3507.41	4841
3509.32	4975
3511.23	5122
3513.15	4969
3515.06	4796
3516.97	4903
3518.89	4880
3520.8	4784
3522.71	4882
3524.62	4883
3526.53	4780
3528.44	4723
3530.35	4713
3532.26	4703
3534.16	4870
3536.07	4902
3537.98	4781
3539.89	4698
3541.79	4746
3543.7	4800
3545.6	4670
3547.51	4645
3549.41	4643
3551.31	4758
3553.21	4708
3555.12	4683
3557.02	4437
3558.92	4589
3560.82	4785
3562.72	4635
3564.62	4589
3566.52	4536
3568.42	4508
3570.32	4581
3572.21	4579
3574.11	4577
3576.01	4515
3577.9	4558
3579.8	4564
3581.69	4704
3583.59	4528
3585.48	4326
3587.37	4365
3589.27	4403
3591.16	4432
3593.05	4308
3594.94	4307
3596.83	4270
3598.72	4460
3600.61	4412
3602.5	4321
3604.39	4373
3606.28	4446
3608.16	4466
3610.05	4419
3611.94	4301
3613.82	4298
3615.71	4259
3617.59	4344
3619.48	4463
3621.36	4453
3623.24	4267
3625.13	4220
3627.01	4319
3628.89	4371
3630.77	4282
3632.65	4214
3634.53	4359
3636.41	4443
3638.29	4352
3640.17	4278
3642.05	4277
3643.93	4326
3645.8	4268
3647.68	4362
3649.56	4328
3651.43	4352
3653.31	4272
3655.18	4191
3657.06	4167
3658.93	4221
3660.8	4160
3662.67	4247
3664.55	4273
3666.42	4251
3668.29	4208
3670.16	4141
3672.03	4321
3673.9	4319
3675.77	4162
3677.64	4208
3679.5	4211
3681.37	4241
3683.24	4272
3685.1	4251
3686.97	4158
3688.83	4114
3690.7	4080
3692.56	4049
3694.43	4361
3696.29	4433
3698.15	4393
3700.02	4174
3701.88	4223
3703.74	4188
3705.6	4231
3707.46	4371
3709.32	4266
3711.18	4311
3713.04	4214
3714.89	4245
3716.75	4266
3718.61	4352
3720.47	4212
3722.32	4118
3724.18	4095
3726.03	4219
3727.89	4210
3729.74	4200
3731.59	4263
3733.45	4230
3735.3	4241
